# Supplementary material for: Electrochemical remote C(sp3)–H thiocyanation
Source: Royal Society of Chemistry journal article supplement (doi:10.1039/d4qo00032c), 2024-01-01
Supplement: d4qo00032c1.pdf [file d4qo00032c1.pdf]

## Table of Contents

|                              |     |
|------------------------------|-----|
| 1. General information       | S2  |
| 2. General procedure         | S2  |
| 3. Characterization data     | S3  |
| 4. Scaled-up reaction        | S15 |
| 5. Follow-up transformations | S17 |
| 6. Mechanism study           | S18 |
| 7. Unsuccessful substrates   | S20 |
| 8. Synthesis of substrates   | S20 |
| 9. Copies of NMR spectra     | S30 |
| 10. Theoretical calculations | S66 |
| 11. References               | S74 |

## 1. General information

All reagents and solvents were commercially available and used as received. The electrochemical instrument is HONGSHENGFENG DPS-305BM. Column chromatography was performed on silica gel (200-300 mesh). NMR spectra were recorded in  $\text{CDCl}_3$  on Bruker AV-500 MHz spectrometers. The chemical shifts ( $\delta$ ) are reported in parts per million (ppm) relative to the residue signal of  $\text{CDCl}_3$  ( $\delta/\text{ppm} = 7.26$  for  $^1\text{H}$  NMR and  $\delta/\text{ppm} = 77.16$  for  $^{13}\text{C}$  NMR). The following abbreviations are used for multiplicities: s = singlet, d = doublet, t = triplet, q = quartet, dd = doublet of doublets, m = multiplet. The coupling constants  $J$  have been given in Hertz (Hz). HRMS were obtained on an Ultima Global spectrometer with an ESI source. Cyclic voltammograms (CV) were performed with a CS electrochemical workstation (CS300H, CorrTest).

## 2. General procedure

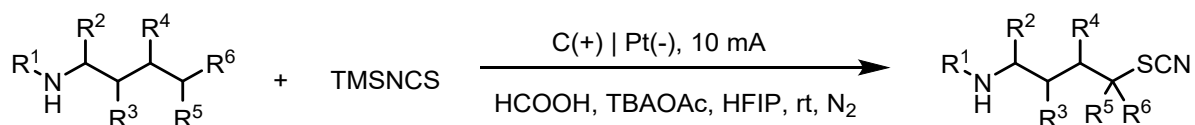

**Procedure:** To a 10 mL three-necked flask equipped with a carbon plate anode (3 cm x 1 cm x 0.3 cm, about 1.5 cm immersion depth in solution) and a platinum plate cathode (1 cm x 1 cm x 0.1 mm) was charged with substrate (0.2 mmol, 1.0 equiv.), TMSNCS (0.3 mmol, 1.5 equiv.), HCOOH (0.4 mmol, 2.0 equiv.), TBAOAc (0.1 mmol, 0.5 equiv.) and HFIP (5 mL). The electrolysis was carried out at room temperature using a constant current of 10 mA under  $\text{N}_2$  for 2-8 h (3.7-14.9 F/mol). After completion of the reaction, the mixture was concentrated under reduced pressure. The residue was purified by column chromatography on silica gel eluting with petroleum ether/ethyl acetate to give the product.

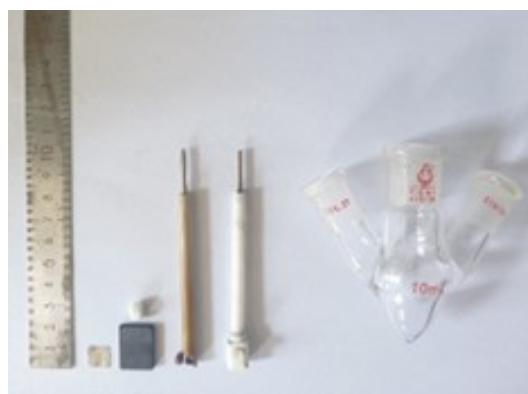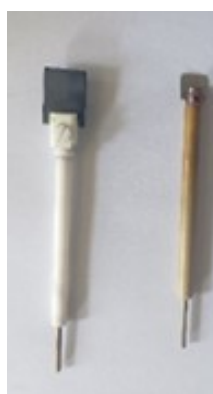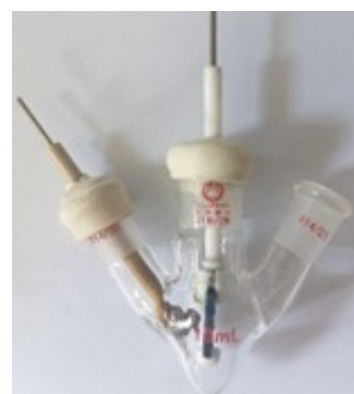

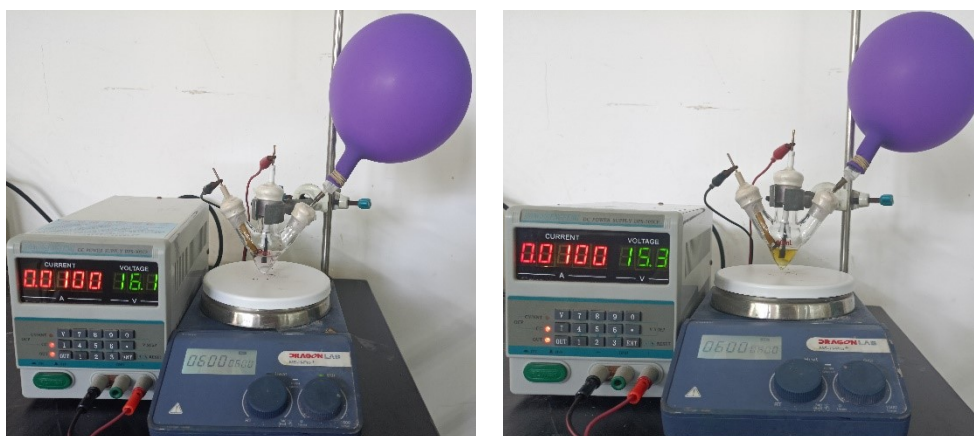

At the beginning of the reaction

At the end of the reaction

**Figure S1.** Electrolysis cell for small scale reaction

### 3. Characterization data

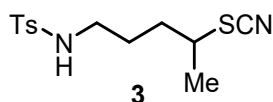

The reaction was conducted following the general procedure in a 0.2 mmol scale for 4.5 h (8.4 F/mol). The residue was purified by column chromatography on silica gel with petroleum ether/ethyl acetate (3:1) to afford **3** (38 mg, 63% yield) as a yellow oil. The spectra matched with the previous report. <sup>[1]</sup>

**<sup>1</sup>H NMR** (500 MHz, CDCl<sub>3</sub>) δ 7.74 (d, *J* = 7.9 Hz, 2H), 7.33 (d, *J* = 7.9 Hz, 2H), 4.48 (t, *J* = 6.5 Hz, 1H), 3.23 – 3.16 (m, 1H), 2.98 (q, *J* = 6.6 Hz, 2H), 2.44 (s, 3H), 1.79 – 1.71 (m, 2H), 1.69 – 1.61 (m, 2H), 1.48 (d, *J* = 6.7 Hz, 3H).

**<sup>13</sup>C NMR** (125 MHz, CDCl<sub>3</sub>) δ 143.8, 136.9, 130.0, 127.2, 111.1, 45.2, 42.6, 34.0, 27.3, 22.1, 21.7.

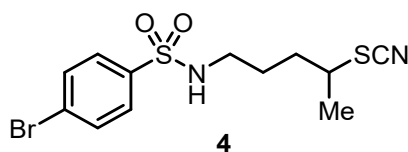

The reaction was conducted following the general procedure in a 0.2 mmol scale for 6 h (11.2 F/mol). The residue was purified by column chromatography on silica gel with petroleum ether/ethyl acetate (5:1) to afford **4** (37 mg, 51% yield) as a yellow oil.

**<sup>1</sup>H NMR** (500 MHz, CDCl<sub>3</sub>) δ 7.72 (d, *J* = 8.6 Hz, 2H), 7.67 (d, *J* = 8.6 Hz, 2H), 4.85 (t, *J* = 6.3 Hz, 1H), 3.24 – 3.17 (m, 1H), 2.98 (q, *J* = 6.6 Hz, 2H), 1.77 – 1.72 (m, 2H), 1.68 – 1.60 (m, 2H), 1.49 (d, *J* = 6.8 Hz, 3H).

**<sup>13</sup>C NMR** (125 MHz, CDCl<sub>3</sub>) δ 138.9, 132.7, 128.7, 128.0, 111.1, 45.1, 42.7, 34.0, 27.3, 22.1.

**HRMS** (ESI-TOF)  $m/z$ :  $[M + Na]^+$  calcd for  $C_{12}H_{15}BrN_2O_2S_2Na$ , 384.9651, found 384.9651.

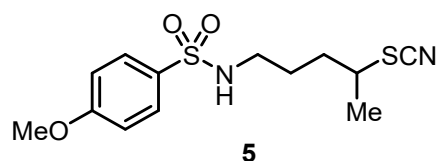

The reaction was conducted following the general procedure in a 0.2 mmol scale for 5 h (9.3 F/mol). The residue was purified by column chromatography on silica gel with petroleum ether/ethyl acetate (3:1) to afford **5** (41 mg, 65% yield) as a yellow oil.

**$^1H$  NMR** (500 MHz,  $CDCl_3$ )  $\delta$  7.79 (d,  $J = 8.9$  Hz, 2H), 6.99 (d,  $J = 8.8$  Hz, 2H), 4.71 (s, 1H), 3.87 (s, 3H), 3.23 – 3.16 (m, 1H), 2.95 (q,  $J = 6.6$  Hz, 2H), 1.78 – 1.70 (m, 2H), 1.67 – 1.62 (m, 2H), 1.48 (d,  $J = 6.8$  Hz, 3H).

**$^{13}C$  NMR** (125 MHz,  $CDCl_3$ )  $\delta$  163.2, 131.4, 129.3, 114.5, 111.2, 55.8, 45.2, 42.6, 34.0, 27.2, 22.1.

**HRMS** (ESI-TOF)  $m/z$ :  $[M + Na]^+$  calcd for  $C_{13}H_{18}N_2O_3S_2Na$ , 337.0651, found 337.0652.

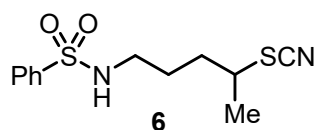

The reaction was conducted following the general procedure in a 0.2 mmol scale for 4.5 h (8.4 F/mol). The residue was purified by column chromatography on silica gel with petroleum ether/ethyl acetate (3:1) to afford **6** (35 mg, 61% yield) as a yellow oil.

**$^1H$  NMR** (500 MHz,  $CDCl_3$ )  $\delta$  7.86 (d,  $J = 7.2$  Hz, 2H), 7.59 (t,  $J = 7.4$  Hz, 1H), 7.53 (t,  $J = 7.6$  Hz, 2H), 5.04 (s, 1H), 3.22 – 3.15 (m, 1H), 2.97 (t,  $J = 6.7$  Hz, 2H), 1.75 – 1.69 (m, 2H), 1.66 – 1.56 (m, 2H), 1.46 (d,  $J = 6.8$  Hz, 3H).

**$^{13}C$  NMR** (125 MHz,  $CDCl_3$ )  $\delta$  139.8, 132.9, 129.4, 127.1, 111.2, 45.1, 42.6, 33.9, 27.2, 22.1.

**HRMS** (ESI-TOF)  $m/z$ :  $[M + Na]^+$  calcd for  $C_{12}H_{16}N_2O_2S_2Na$ , 307.0545, found 307.0554.

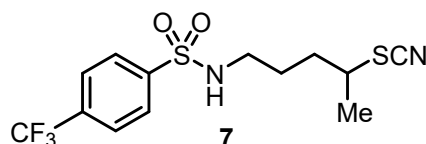

The reaction was conducted following the general procedure in a 0.2 mmol scale for 8 h (14.9 F/mol). The residue was purified by column chromatography on silica gel with petroleum ether/ethyl acetate (5:1) to afford **7** (24 mg, 34% yield) as a yellow oil.

**<sup>1</sup>H NMR** (500 MHz, CDCl<sub>3</sub>) δ 8.00 (d, *J* = 8.1 Hz, 2H), 7.81 (d, *J* = 8.1 Hz, 2H), 4.80 (s, 1H), 3.25 – 3.18 (m, 1H), 3.07 – 3.02 (m, 2H), 1.79 – 1.72 (m, 2H), 1.71 – 1.62 (m, 2H), 1.49 (d, *J* = 6.7 Hz, 3H).

**<sup>13</sup>C NMR** (125 MHz, CDCl<sub>3</sub>) δ 143.7, 134.7 (q, *J*<sub>C-F</sub> = 34.9 Hz), 127.7, 126.6 (d, *J*<sub>C-F</sub> = 3.9 Hz), 123.3 (q, *J*<sub>C-F</sub> = 272.9 Hz), 111.1, 45.1, 42.8, 34.0, 27.4, 22.0.

**<sup>19</sup>F NMR** (376 MHz, CDCl<sub>3</sub>) δ -63.14.

**HRMS** (ESI-TOF) *m/z*: [M + Na]<sup>+</sup> calcd for C<sub>13</sub>H<sub>15</sub>F<sub>3</sub>N<sub>2</sub>O<sub>2</sub>S<sub>2</sub>Na, 375.0419, found 375.0421.

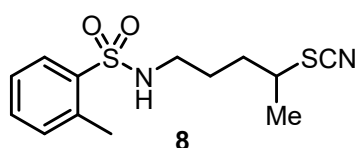

The reaction was conducted following the general procedure in a 0.2 mmol scale for 5 h (9.3 F/mol). The residue was purified by column chromatography on silica gel with petroleum ether/ethyl acetate (3:1) to afford **8** (31 mg, 52% yield) as a yellow oil.

**<sup>1</sup>H NMR** (500 MHz, CDCl<sub>3</sub>) δ 7.94 (d, *J* = 7.9 Hz, 1H), 7.47 (t, *J* = 7.3 Hz, 1H), 7.32 (t, *J* = 6.9 Hz, 2H), 4.94 (s, 1H), 3.19 – 3.12 (m, 1H), 2.97 (q, *J* = 6.5 Hz, 2H), 2.64 (s, 3H), 1.75 – 1.68 (m, 2H), 1.65 – 1.57 (m, 2H), 1.45 (d, *J* = 6.8 Hz, 3H).

**<sup>13</sup>C NMR** (125 MHz, CDCl<sub>3</sub>) δ 137.9, 137.1, 133.0, 132.8, 129.5, 126.4, 111.1, 45.1, 42.4, 34.0, 27.4, 22.0, 20.4.

**HRMS** (ESI-TOF) *m/z*: [M + Na]<sup>+</sup> calcd for C<sub>13</sub>H<sub>18</sub>N<sub>2</sub>O<sub>2</sub>S<sub>2</sub>Na, 321.0702, found 321.0710.

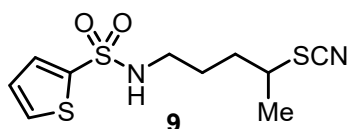

The reaction was conducted following the general procedure in a 0.2 mmol scale for 5 h (9.3 F/mol). The residue was purified by column chromatography on silica gel with petroleum ether/ethyl acetate (3:1) to afford **9** (32 mg, 55% yield) as a yellow oil.

**<sup>1</sup>H NMR** (500 MHz, CDCl<sub>3</sub>) δ 7.63 – 7.60 (m, 2H), 7.11 (t, *J* = 4.4 Hz, 1H), 4.85 (t, *J* = 6.4 Hz, 1H), 3.26 – 3.19 (m, 1H), 3.07 (q, *J* = 6.5 Hz, 2H), 1.80 – 1.73 (m, 2H), 1.70 – 1.62 (m, 2H), 1.50 (d, *J* = 6.8 Hz, 3H).

**<sup>13</sup>C NMR** (125 MHz, CDCl<sub>3</sub>) δ 140.8, 132.4, 132.2, 127.7, 111.2, 45.2, 42.9, 34.0, 27.2, 22.2.

**HRMS** (ESI-TOF) *m/z*: [M + H]<sup>+</sup> calcd for C<sub>19</sub>H<sub>30</sub>N<sub>3</sub>O<sub>4</sub>S<sub>2</sub>, 291.0290, found 291.0298.

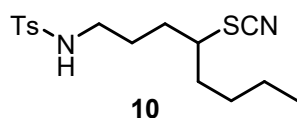

The reaction was conducted following the general procedure in a 0.2 mmol scale for 5 h (9.3 F/mol). The residue was purified by column chromatography on silica gel with petroleum ether/ethyl acetate (3:1) to afford **10** (39 mg, 58% yield) as a colorless oil.

**<sup>1</sup>H NMR** (500 MHz, CDCl<sub>3</sub>) δ 7.74 (d, *J* = 7.9 Hz, 2H), 7.31 (d, *J* = 7.9 Hz, 2H), 4.98 (t, *J* = 6.3 Hz, 1H), 3.00 – 2.93 (m, 3H), 2.42 (s, 3H), 1.82 – 1.77 (m, 1H), 1.73 – 1.57 (m, 5H), 1.48 – 1.42 (m, 1H), 1.35 – 1.26 (m, 3H), 0.90 (t, *J* = 7.0 Hz, 3H).

**<sup>13</sup>C NMR** (125 MHz, CDCl<sub>3</sub>) δ 143.7, 136.8, 129.9, 127.2, 111.2, 51.2, 42.6, 35.2, 32.4, 29.0, 27.0, 22.3, 21.6, 14.0.

**HRMS** (ESI-TOF) *m/z*: [M + H]<sup>+</sup> calcd for C<sub>16</sub>H<sub>25</sub>N<sub>2</sub>O<sub>2</sub>S<sub>2</sub>, 341.1352, found 341.1352.

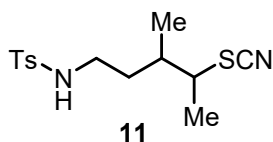

The reaction was conducted following the general procedure in a 0.2 mmol scale for 5 h (9.3 F/mol). The residue was purified by column chromatography on silica gel with petroleum ether/ethyl acetate (3:1) to afford **11** (32 mg, 51% yield, dr = 1:1) as a yellow oil. The spectra matched with the previous report.<sup>[1]</sup>

**<sup>1</sup>H NMR** (500 MHz, CDCl<sub>3</sub>) δ 7.75 (d, *J* = 8.3 Hz, 2H), 7.32 (d, *J* = 8.0 Hz, 2H), 4.86 (s, 1H), 3.38 – 3.28 (m, 1H), 3.05 – 2.97 (m, 1H), 2.95 – 2.90 (m, 1H), 2.43 (s, 3H), 1.95 – 1.88 (m, 1H), 1.69 – 1.62 (m, 1H), 1.44 – 1.37 (m, 4H), 0.95 (dd, *J* = 6.3, 3.3 Hz, 3H).

**<sup>13</sup>C NMR** (125 MHz, CDCl<sub>3</sub>) δ 143.8, 136.8, 130.0, 127.2, 112.2, 112.0, 51.2, 50.7, 41.0, 40.9, 35.8, 35.7, 33.6, 21.7, 19.2, 17.4, 15.33, 15.26.

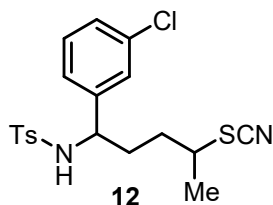

The reaction was conducted following the general procedure in a 0.2 mmol scale for 3.5 h (6.5 F/mol). The residue was purified by column chromatography on silica gel with petroleum ether/ethyl acetate (5:1) to afford **12** (42 mg, 52% yield, dr = 3:2) as a yellow oil.

**<sup>1</sup>H NMR** (500 MHz, CDCl<sub>3</sub>) δ 7.52 (d, *J* = 7.9 Hz, 2H), 7.14 – 7.10 (m, 4H), 6.95 – 6.93 (m, 1H), 6.83 (d, *J* = 5.6 Hz, 1H), 5.46 (s, 1H), 4.23 – 4.19 (m, 1H), 3.21 – 3.13 (m, 1H), 2.37 (s, 3H), 1.92 – 1.75 (m, 3H), 1.65 – 1.55 (m, 1H), 1.45 – 1.43 (m, 3H).

**<sup>13</sup>C NMR** (125 MHz, CDCl<sub>3</sub>) δ 143.8, 142.3, 142.2, 137.3, 134.7, 130.2, 130.1, 129.6, 128.0, 127.9, 127.1, 126.9, 126.8, 124.6, 111.0, 57.7, 57.3, 45.3, 45.0, 34.8, 34.7, 33.5, 33.3, 22.3, 22.1, 21.6.

**HRMS** (ESI-TOF) *m/z*: [M + Na]<sup>+</sup> calcd for C<sub>19</sub>H<sub>21</sub>ClN<sub>2</sub>O<sub>2</sub>S<sub>2</sub>Na, 431.0625, found 431.0631.

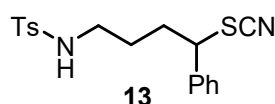

The reaction was conducted following the general procedure in a 0.2 mmol scale for 4 h (7.5 F/mol). The residue was purified by column chromatography on silica gel with petroleum ether/ethyl acetate (5:1) to afford **13** (59 mg, 82% yield) as a colorless oil. The spectra matched with the previous report. <sup>[1]</sup>

**<sup>1</sup>H NMR** (500 MHz, CDCl<sub>3</sub>) δ 7.72 (d, *J* = 7.9 Hz, 2H), 7.37 – 7.23 (m, 7H), 4.83 (s, 1H), 4.26 (t, *J* = 7.8 Hz, 1H), 2.93 (q, *J* = 6.2 Hz, 2H), 2.42 (s, 3H), 2.21 – 2.09 (m, 2H), 1.55 – 1.45 (m, 2H).

**<sup>13</sup>C NMR** (125 MHz, CDCl<sub>3</sub>) δ 143.7, 137.9, 136.8, 129.9, 129.3, 129.2, 127.5, 127.2, 111.6, 53.0, 42.4, 32.7, 27.6, 21.7.

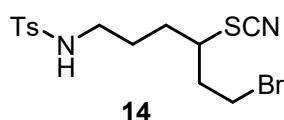

The reaction was conducted following the general procedure in a 0.2 mmol scale for 5 h (9.3 F/mol). The residue was purified by column chromatography on silica gel with petroleum ether/ethyl acetate (3:1) to afford **14** (41 mg, 52% yield) as a colorless oil. The spectra matched with the previous report. <sup>[1]</sup>

**<sup>1</sup>H NMR** (500 MHz, CDCl<sub>3</sub>) δ 7.75 (d, *J* = 8.0 Hz, 2H), 7.33 (d, *J* = 7.8 Hz, 2H), 4.83 (t, *J* = 6.4 Hz, 1H), 3.55 (t, *J* = 6.2 Hz, 2H), 3.00 – 2.97 (m, 1H), 2.99 (q, *J* = 6.4 Hz, 2H), 2.43 (s, 3H), 2.20 (q, *J* = 6.4 Hz, 2H), 1.91 – 1.70 (m, 3H), 1.69 – 1.56 (m, 1H).

**<sup>13</sup>C NMR** (125 MHz, CDCl<sub>3</sub>) δ 143.8, 136.9, 130.0, 127.2, 109.9, 48.7, 42.5, 37.7, 32.2, 29.9, 27.2, 21.7.

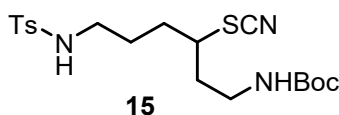

The reaction was conducted following the general procedure with 12 mA in a 0.2 mmol scale for 6 h (13.4 F/mol). The residue was purified by column chromatography on silica gel with petroleum ether/ethyl acetate (2:1) to afford **15** (36 mg, 42% yield) as a yellow oil.

**<sup>1</sup>H NMR** (500 MHz, CDCl<sub>3</sub>) δ 7.73 (d, *J* = 8.1 Hz, 2H), 7.30 (d, *J* = 8.0 Hz, 2H), 5.26 (s, 1H), 4.82 (s, 1H), 3.32 – 3.21 (m, 2H), 3.11 – 3.03 (m, 1H), 2.97 – 2.92 (m, 2H), 2.42 (s, 3H), 1.97 – 1.83 (m, 4H), 1.77 – 1.67 (m, 2H), 1.42 (s, 9H).

**<sup>13</sup>C NMR** (125 MHz, CDCl<sub>3</sub>) δ 156.4, 143.7, 137.1, 129.9, 127.2, 110.8, 79.9, 47.9, 42.2, 38.0, 36.5, 31.9, 28.5, 27.0, 21.6.

**HRMS** (ESI-TOF) *m/z*: [M + Na]<sup>+</sup> calcd for C<sub>19</sub>H<sub>29</sub>N<sub>3</sub>O<sub>4</sub>S<sub>2</sub>Na, 450.1497, found 450.1503.

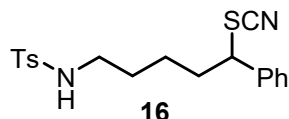

The reaction was conducted following the general procedure in a 0.2 mmol scale for 4 h (7.5 F/mol). The residue was purified by column chromatography on silica gel with petroleum ether/ethyl acetate (5:1) to afford **16** (59 mg, 79% yield) as a colorless oil.

**<sup>1</sup>H NMR** (500 MHz, CDCl<sub>3</sub>) δ 7.72 (d, *J* = 8.2 Hz, 2H), 7.40 – 7.26 (m, 7H), 4.90 (t, *J* = 6.2 Hz, 1H), 4.25 (t, *J* = 7.7 Hz, 1H), 2.87 (q, *J* = 6.7 Hz, 2H), 2.42 (s, 3H), 2.10 – 2.04 (m, 2H), 1.51 – 1.46 (m, 2H), 1.38 – 1.32 (m, 1H), 1.28 – 1.23 (m, 1H).

**<sup>13</sup>C NMR** (125 MHz, CDCl<sub>3</sub>) δ 143.6, 138.1, 137.0, 129.8, 129.2, 129.1, 127.5, 127.2, 111.7, 53.4, 42.8, 35.2, 29.0, 24.5, 21.6.

**HRMS** (ESI-TOF) *m/z*: [M + Na]<sup>+</sup> calcd for C<sub>19</sub>H<sub>22</sub>N<sub>2</sub>O<sub>2</sub>S<sub>2</sub>Na, 397.1015, found 397.1022.

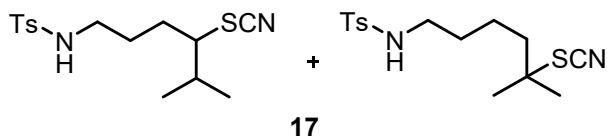

The reaction was conducted following the general procedure in a 0.2 mmol scale for 8 h (14.9 F/mol). The residue was purified by column chromatography on silica gel with petroleum ether/ethyl acetate (3:1) to afford **17** (35 mg, 53% yield, *rr* = 3:1) as a yellow oil. The spectra matched with the previous report.<sup>[1]</sup>



**<sup>1</sup>H NMR** (500 MHz, CDCl<sub>3</sub>) δ 7.74 (d, *J* = 8.2 Hz, 2H), 7.31 (d, *J* = 7.9 Hz, 2H), 5.00 (t, *J* = 6.3 Hz, 0.74H), 4.93 (t, *J* = 6.2 Hz, 0.22H), 3.04 – 2.87 (m, 2.87H), 2.42 (s, 3H), 2.05 – 1.94 (m, 0.86H), 1.88 – 1.70 (m, 1.95H), 1.68 – 1.54 (m, 2.22H), 1.52 – 1.35 (m, 2.45H), 0.99 (dd, *J* = 19.4, 6.7 Hz, 4.77H).

**<sup>13</sup>C NMR** (125 MHz, CDCl<sub>3</sub>) δ 143.70, 143.67, 136.9, 136.8, 129.93, 129.91, 127.2, 112.3, 112.2, 58.7, 55.78, 55.74, 42.9, 42.6, 42.3, 33.4, 29.7, 28.8, 27.5, 22.1, 21.64, 21.60, 20.1, 18.7.

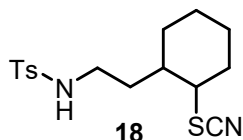

The reaction was conducted following the general procedure in a 0.2 mmol scale for 5 h (9.3 F/mol). The residue was purified by column chromatography on silica gel with petroleum ether/ethyl acetate (8:1) to afford **18** (43 mg, 63% yield, dr = 1.2:1) as a colorless oil. The spectra matched with the previous report. <sup>[1]</sup>

**<sup>1</sup>H NMR** (500 MHz, CDCl<sub>3</sub>) δ = 7.75 (dd, *J* = 8.3, 2.3 Hz, 2H), 7.33 (d, *J* = 7.9 Hz, 2H), 4.84 (t, *J* = 6.5 Hz, 0.47H), 4.76 (t, *J* = 6.3 Hz, 0.55H), 3.77 – 3.76 (m, 0.47H), 3.11 – 2.92 (m, 2H), 2.80 – 2.74 (m, 0.56H), 2.44 (s, 3H), 2.25 – 2.20 (m, 0.56H), 2.09 – 2.03 (m, 0.54H), 1.98 – 1.64 (m, 5H), 1.56 – 1.45 (m, 2.27H), 1.41 – 1.32 (m, 1H), 1.30 – 1.16 (m, 2.33H), 1.05 – 0.97 (m, 0.63H).

**<sup>13</sup>C NMR** (125 MHz, CDCl<sub>3</sub>) δ 143.8, 143.7, 136.79, 136.76, 130.0, 129.9, 127.24, 127.20, 112.9, 111.3, 54.6, 54.0, 40.5, 40.4, 40.0, 37.5, 35.1, 33.9, 33.1, 31.8, 29.8, 27.6, 26.5, 24.9, 24.5, 21.7, 21.4.

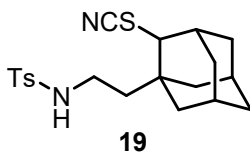

The reaction was conducted following the general procedure in a 0.2 mmol scale for 5 h (9.3 F/mol). The residue was purified by column chromatography on silica gel with petroleum ether/ethyl acetate (10:1) to afford **19** (72 mg, 92% yield) as a yellow oil. The spectra matched with the previous report. <sup>[1]</sup>

**<sup>1</sup>H NMR** (500 MHz, CDCl<sub>3</sub>) δ 7.75 (d, *J* = 8.3 Hz, 2H), 7.32 (d, *J* = 8.0 Hz, 2H), 4.70 (t, *J* = 6.1 Hz, 1H), 3.64 (s, 1H), 3.06 – 2.89 (m, 2H), 2.43 (s, 3H), 2.28 – 2.27 (m, 1H), 1.97 – 1.88 (m, 4H), 1.75 – 1.68 (m, 2H), 1.65 – 1.54 (m, 5H), 1.49 – 1.36 (m, 3H).

$^{13}\text{C}$  NMR (125 MHz,  $\text{CDCl}_3$ )  $\delta$  143.7, 136.8, 129.9, 127.3, 113.1, 62.6, 42.0, 40.7, 37.8, 37.7, 36.54, 36.45, 34.5, 31.1, 27.64, 27.58, 21.7.

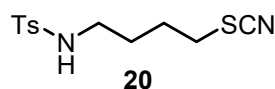

The reaction was conducted following the general procedure in a 0.2 mmol scale for 5 h (9.3 F/mol). The residue was purified by column chromatography on silica gel with petroleum ether/ethyl acetate (3:1) to afford **20** (30 mg, 53% yield) as a yellow oil.

$^1\text{H}$  NMR (500 MHz,  $\text{CDCl}_3$ )  $\delta$  7.74 (d,  $J = 7.6$  Hz, 2H), 7.32 (d,  $J = 7.8$  Hz, 2H), 4.91 (s, 1H), 2.96 (q,  $J = 6.0$  Hz, 2H), 2.90 (t,  $J = 7.0$  Hz, 2H), 2.43 (s, 3H), 1.86 – 1.80 (m, 2H), 1.66 – 1.60 (m, 2H).

$^{13}\text{C}$  NMR (125 MHz,  $\text{CDCl}_3$ )  $\delta$  143.8, 136.8, 130.0, 127.2, 112.2, 42.4, 33.5, 27.9, 27.0, 21.7.

HRMS (ESI-TOF)  $m/z$ :  $[\text{M} + \text{Na}]^+$  calcd for  $\text{C}_{12}\text{H}_{16}\text{N}_2\text{O}_2\text{S}_2\text{Na}$ , 307.0545, found 307.0551.

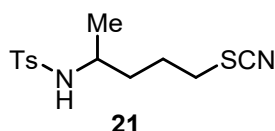

The reaction was conducted following the general procedure in a 0.2 mmol scale for 5 h (9.3 F/mol). The residue was purified by column chromatography on silica gel with petroleum ether/ethyl acetate (3:1) to afford **21** (29 mg, 48% yield) as a yellow oil.

$^1\text{H}$  NMR (500 MHz,  $\text{CDCl}_3$ )  $\delta$  7.76 (d,  $J = 7.8$  Hz, 2H), 7.32 (d,  $J = 7.8$  Hz, 2H), 4.62 (d,  $J = 8.5$  Hz, 1H), 3.34 – 3.29 (m, 1H), 2.86 (t,  $J = 8.6$  Hz, 2H), 2.43 (s, 3H), 1.85 – 1.75 (m, 2H), 1.58 – 1.47 (m, 2H), 1.00 (d,  $J = 5.9$  Hz, 3H).

$^{13}\text{C}$  NMR (125 MHz,  $\text{CDCl}_3$ )  $\delta$  143.7, 138.0, 130.0, 127.1, 112.3, 49.3, 35.6, 33.6, 26.1, 21.8, 21.7.

HRMS (ESI-TOF)  $m/z$ :  $[\text{M} + \text{Na}]^+$  calcd for  $\text{C}_{13}\text{H}_{18}\text{N}_2\text{O}_2\text{S}_2\text{Na}$ , 321.0702, found 321.0708.

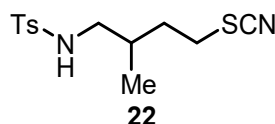

The reaction was conducted following the general procedure in a 0.2 mmol scale for 5 h (9.3 F/mol). The residue was purified by column chromatography on silica gel with petroleum ether/ethyl acetate (3:1) to afford **22** (35 mg, 59% yield) as a yellow oil.

$^1\text{H}$  NMR (500 MHz,  $\text{CDCl}_3$ )  $\delta$  7.74 (d,  $J = 8.4$  Hz, 2H), 7.32 (d,  $J = 8.0$  Hz, 2H), 4.94 (s, 1H),

3.00 – 2.94 (m, 1H), 2.90 – 2.85 (m, 1H), 2.82 (t,  $J = 5.2$  Hz, 2H), 2.43 (s, 3H), 1.92 – 1.86 (m, 1H), 1.82 – 1.76 (m, 1H), 1.65 – 1.59 (m, 1H), 0.92 (d,  $J = 6.7$  Hz, 3H).

$^{13}\text{C NMR}$  (125 MHz,  $\text{CDCl}_3$ )  $\delta$  143.8, 136.8, 130.0, 127.1, 112.3, 48.4, 34.1, 32.1, 31.6, 21.7, 17.3.

**HRMS** (ESI-TOF)  $m/z$ :  $[\text{M} + \text{Na}]^+$  calcd for  $\text{C}_{13}\text{H}_{18}\text{N}_2\text{O}_2\text{S}_2\text{Na}$ , 321.0702, found 321.0712.

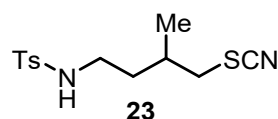

The reaction was conducted following the general procedure in a 0.2 mmol scale for 4.5 h (8.4 F/mol). The residue was purified by column chromatography on silica gel with petroleum ether/ethyl acetate (3:1) to afford **23** (24 mg, 41% yield) as a yellow oil.

$^1\text{H NMR}$  (500 MHz,  $\text{CDCl}_3$ )  $\delta$  7.75 (d,  $J = 8.1$  Hz, 2H), 7.32 (d,  $J = 7.9$  Hz, 2H), 4.77 (t,  $J = 5.0$  Hz, 1H), 3.04 – 2.98 (m, 1H), 2.97 – 2.90 (m, 2H), 2.83 – 2.79 (m, 1H), 2.43 (s, 3H), 2.01 – 1.94 (m, 1H), 1.71 – 1.64 (m, 1H), 1.46 – 1.39 (m, 1H), 1.02 (d,  $J = 6.4$  Hz, 3H).

$^{13}\text{C NMR}$  (125 MHz,  $\text{CDCl}_3$ )  $\delta$  143.8, 136.8, 130.0, 127.2, 112.7, 41.0, 40.8, 34.9, 31.4, 21.7, 18.3.

**HRMS** (ESI-TOF)  $m/z$ :  $[\text{M} + \text{Na}]^+$  calcd for  $\text{C}_{13}\text{H}_{18}\text{N}_2\text{O}_2\text{S}_2\text{Na}$ , 321.0702, found 321.0710.

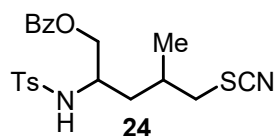

The reaction was conducted following the general procedure in a 0.2 mmol scale for 5 h (9.3 F/mol). The residue was purified by column chromatography on silica gel with petroleum ether/ethyl acetate (5:1) to afford **24** (47 mg, 54% yield, dr = 1.7:1) as a yellow oil.

$^1\text{H NMR}$  (500 MHz,  $\text{CDCl}_3$ )  $\delta$  7.92 – 7.87 (m, 2H), 7.75 – 7.71 (m, 2H), 7.57 (t,  $J = 7.6$  Hz, 1H), 7.43 – 7.39 (m, 2H), 7.21 – 7.15 (m, 2H), 5.26 (s, 1H), 4.23 – 4.03 (m, 2H), 3.73 – 3.63 (m, 1H), 3.00 – 2.82 (m, 2H), 2.34 (s, 1.09H), 2.31 (s, 1.87H), 2.20 – 2.02 (m, 1H), 1.78 – 1.72 (m, 1H), 1.60 – 1.54 (m, 1H), 1.10 (d,  $J = 6.7$  Hz, 1.80H), 0.97 (d,  $J = 6.6$  Hz, 1.05H).

$^{13}\text{C NMR}$  (125 MHz,  $\text{CDCl}_3$ )  $\delta$  166.5, 166.4, 143.8, 137.8, 137.6, 133.5, 130.0, 129.8, 129.4, 129.2, 128.6, 128.5, 127.0, 126.9, 112.9, 112.7, 66.8, 65.9, 51.1, 51.0, 41.5, 40.5, 38.4, 37.9, 30.7, 30.4, 21.7, 19.1, 18.2.

**HRMS** (ESI-TOF)  $m/z$ :  $[\text{M} + \text{Na}]^+$  calcd for  $\text{C}_{21}\text{H}_{24}\text{N}_2\text{O}_4\text{S}_2\text{Na}$ , 455.1070, found 455.1066.

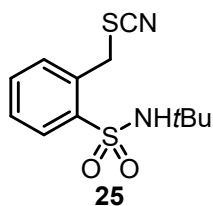

The reaction was conducted following the general procedure in a 0.2 mmol scale for 4 h (7.5 F/mol). The residue was purified by column chromatography on silica gel with petroleum ether/ethyl acetate (5:1) to afford **25** (29 mg, 51% yield) as a yellow oil.

**<sup>1</sup>H NMR** (500 MHz, CDCl<sub>3</sub>) δ 8.06 (d, *J* = 7.8 Hz, 1H), 7.63 – 7.60 (m, 1H), 7.56 – 7.50 (m, 2H), 4.74 (s, 1H), 4.57 (s, 2H), 1.27 (s, 9H).

**<sup>13</sup>C NMR** (125 MHz, CDCl<sub>3</sub>) δ 140.8, 133.8, 133.4, 132.3, 130.0, 129.4, 112.8, 55.9, 35.8, 30.3.

**HRMS** (ESI-TOF) *m/z*: [M + Na]<sup>+</sup> calcd for C<sub>12</sub>H<sub>16</sub>N<sub>2</sub>O<sub>2</sub>S<sub>2</sub>Na, 307.0551, found 307.0558.

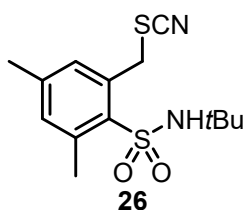

The reaction was conducted following the general procedure in a 0.2 mmol scale for 3.5 h (6.5 F/mol). The residue was purified by column chromatography on silica gel with petroleum ether/ethyl acetate (5:1) to afford **26** (36 mg, 57% yield) as a white solid.

**<sup>1</sup>H NMR** (500 MHz, CDCl<sub>3</sub>) δ 7.15 (s, 1H), 7.08 (s, 1H), 4.64 (s, 1H), 4.52 (s, 2H), 2.68 (s, 3H), 2.37 (s, 3H), 1.24 (s, 9H).

**<sup>13</sup>C NMR** (125 MHz, CDCl<sub>3</sub>) δ 143.1, 139.5, 136.2, 135.9, 135.1, 131.8, 113.9, 55.5, 39.2, 30.3, 22.1, 21.1.

**HRMS** (ESI-TOF) *m/z*: [M + Na]<sup>+</sup> calcd for C<sub>14</sub>H<sub>20</sub>N<sub>2</sub>O<sub>2</sub>S<sub>2</sub>Na, 335.0864, found 335.0874.

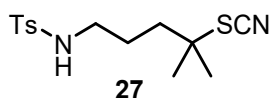

The reaction was conducted following the general procedure in a 0.2 mmol scale for 4 h (7.5 F/mol). The residue was purified by column chromatography on silica gel with petroleum ether/ethyl acetate (5:1) to afford **27** (24 mg, 38% yield) as a yellow oil. The spectra matched with the previous report.<sup>[2]</sup>

**<sup>1</sup>H NMR** (500 MHz, CDCl<sub>3</sub>) δ 7.75 (d, *J* = 8.1 Hz, 2H), 7.32 (d, *J* = 8.4 Hz, 2H), 4.95 (t, *J* = 6.1 Hz, 1H), 2.95 (q, *J* = 6.6 Hz, 2H), 2.42 (s, 3H), 1.73 – 1.64 (m, 2H), 1.66 – 1.55 (m, 2H), 1.44 (s, 6H).

**<sup>13</sup>C NMR** (125 MHz, CDCl<sub>3</sub>) δ 143.7, 136.9, 130.0, 127.2, 111.7, 55.4, 43.1, 39.8, 28.9, 25.4, 21.6.

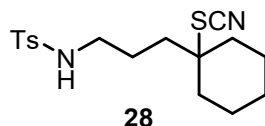

The reaction was conducted following the general procedure in a 0.2 mmol scale for 4.5 h (8.4 F/mol). The residue was purified by column chromatography on silica gel with petroleum ether/ethyl acetate (3:1) to afford **28** (37 mg, 52% yield) as a yellow oil. The spectra matched with the previous report. <sup>[1]</sup>

**<sup>1</sup>H NMR** (400 MHz, CDCl<sub>3</sub>) δ 7.75 (d, *J* = 8.2 Hz, 2H), 7.32 (d, *J* = 8.0 Hz, 2H), 4.78 (s, 1H), 2.97 (q, *J* = 6.4 Hz, 2H), 2.43 (s, 3H), 1.83 – 1.80 (m, 2H), 1.76 – 1.71 (m, 5H), 1.60 – 1.53 (m, 7H).

**<sup>13</sup>C NMR** (125 MHz, CDCl<sub>3</sub>) δ 143.7, 137.0, 129.9, 127.2, 111.6, 61.0, 43.3, 38.9, 36.4, 25.4, 24.3, 22.3, 21.7.

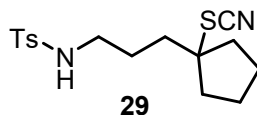

The reaction was conducted following the general procedure in a 0.2 mmol scale for 4.5 h (8.4 F/mol). The residue was purified by column chromatography on silica gel with petroleum ether/ethyl acetate (3:1) to afford **29** (43 mg, 64% yield) as a yellow oil. The spectra matched with the previous report. <sup>[1]</sup>

**<sup>1</sup>H NMR** (500 MHz, CDCl<sub>3</sub>) δ 7.75 (d, *J* = 8.2 Hz, 2H), 7.32 (d, *J* = 7.9 Hz, 2H), 4.67 (s, 1H), 2.98 (q, *J* = 6.6 Hz, 2H), 2.43 (s, 3H), 1.95 – 1.78 (m, 6H), 1.78 – 1.63 (m, 6H).

**<sup>13</sup>C NMR** (125 MHz, CDCl<sub>3</sub>) δ 143.7, 136.9, 123.0, 127.2, 112.3, 66.8, 43.2, 39.2, 38.4, 26.5, 23.9, 21.7.

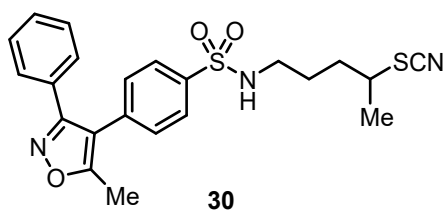

The reaction was conducted following the general procedure in a 0.2 mmol scale for 5 h (9.3 F/mol). The residue was purified by column chromatography on silica gel with petroleum ether/ethyl acetate (3:1) to afford **30** (60 mg, 68% yield) as a yellow oil.

**<sup>1</sup>H NMR** (500 MHz, CDCl<sub>3</sub>) δ 7.84 (d, *J* = 8.4 Hz, 2H), 7.49 – 7.29 (m, 7H), 4.91 (t, *J* = 6.5 Hz, 1H), 3.26 – 3.19 (m, 1H), 3.03 (q, *J* = 6.6 Hz, 2H), 2.49 (s, 3H), 1.97 – 1.73 (m, 2H), 1.72 – 1.61 (m, 2H), 1.49 (d, *J* = 6.6 Hz, 3H).

**<sup>13</sup>C NMR** (125 MHz, CDCl<sub>3</sub>) δ 167.4, 161.2, 139.2, 135.5, 130.5, 129.9, 128.9, 128.6, 127.5, 114.6, 111.1, 45.2, 42.7, 34.0, 27.4, 22.1, 11.9.

**HRMS** (ESI-TOF) *m/z*: [M + Na]<sup>+</sup> calcd for C<sub>22</sub>H<sub>23</sub>N<sub>3</sub>O<sub>3</sub>S<sub>2</sub>Na, 464.1073, found 464.1077.

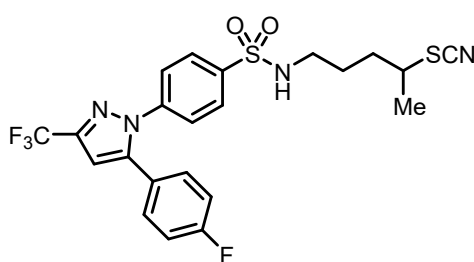

**31**

The reaction was conducted following the general procedure with TFA (0.4 mmol, 2.0 equiv.) in a 0.2 mmol scale for 3 h (5.6 F/mol). The residue was purified by column chromatography on silica gel with petroleum ether/ethyl acetate (3:1) to afford **31** (43 mg, 42% yield) as a colorless oil.

**<sup>1</sup>H NMR** (500 MHz, CDCl<sub>3</sub>) δ 7.86 (d, *J* = 8.5 Hz, 2H), 7.47 (d, *J* = 8.5 Hz, 2H), 7.24 – 7.21 (m, 2H), 7.08 (t, *J* = 8.4 Hz, 2H), 6.76 (s, 1H), 4.90 (t, *J* = 6.3 Hz, 1H), 3.24 – 3.19 (m, 1H), 2.98 (q, *J* = 6.7 Hz, 2H), 1.77 – 1.66 (m, 4H), 1.49 (d, *J* = 6.8 Hz, 3H).

**<sup>13</sup>C NMR** (125 MHz, CDCl<sub>3</sub>) δ 163.5 (d, *J*<sub>C-F</sub> = 251.3 Hz), 144.4 (q, *J*<sub>C-F</sub> = 35.1 Hz), 142.5, 139.8, 131.0 (d, *J*<sub>C-F</sub> = 8.4 Hz), 128.3, 128.2 (q, *J*<sub>C-F</sub> = 282.0 Hz), 125.8, 124.9 (d, *J*<sub>C-F</sub> = 3.5 Hz), 116.5 (d, *J*<sub>C-F</sub> = 22.1 Hz), 111.1, 106.8, 45.2, 42.7, 34.0, 27.4, 22.1.

**HRMS** (ESI-TOF) *m/z*: [M + Na]<sup>+</sup> calcd for C<sub>22</sub>H<sub>20</sub>F<sub>4</sub>N<sub>4</sub>O<sub>2</sub>S<sub>2</sub>Na, 535.0856, found 535.0859.

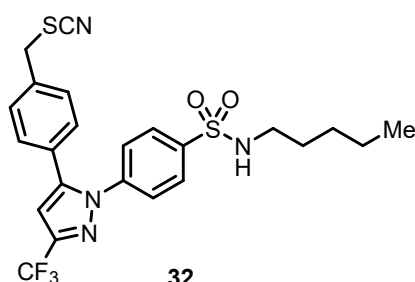

**32**

The reaction was conducted following the general procedure in a 0.2 mmol scale for 4 h (7.5 F/mol). The residue was purified by column chromatography on silica gel with petroleum ether/ethyl acetate (5:1) to afford **32** (77 mg, 76% yield) as a colorless oil.

**<sup>1</sup>H NMR** (500 MHz, CDCl<sub>3</sub>) δ 7.86 (d, *J* = 8.7 Hz, 2H), 7.45 (d, *J* = 8.8 Hz, 2H), 7.39 (d, *J* = 8.3 Hz, 2H), 7.27 (d, *J* = 8.8 Hz, 2H), 6.82 (s, 1H), 4.82 (s, 1H), 4.16 (s, 2H), 2.92 (t, *J* = 7.3 Hz, 2H), 1.49 – 1.41 (m, 2H), 1.28 – 1.22 (m, 4H), 0.86 (t, *J* = 6.7 Hz, 3H).

**<sup>13</sup>C NMR** (125 MHz, CDCl<sub>3</sub>) δ 144.33 (q, *J*<sub>C-F</sub> = 38.5 Hz), 144.29, 142.2, 140.1, 136.2, 129.8, 129.7, 128.3, 125.7, 121.1 (q, *J*<sub>C-F</sub> = 269.2 Hz), 111.4, 106.8, 43.4, 37.6, 29.3, 28.7, 22.2, 14.0.

**HRMS** (ESI-TOF) *m/z*: [M + Na]<sup>+</sup> calcd for C<sub>23</sub>H<sub>23</sub>F<sub>3</sub>N<sub>4</sub>O<sub>2</sub>S<sub>2</sub>Na, 531.1107, found 531.1112.

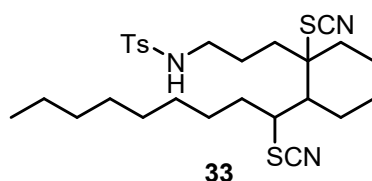

The reaction was conducted following the general procedure in a 0.2 mmol scale for 2 h (3.7 F/mol). The residue was purified by column chromatography on silica gel with petroleum ether/ethyl acetate (10:1) to afford **33** (57 mg, 53% yield) as a colorless oil.

**<sup>1</sup>H NMR** (500 MHz, CDCl<sub>3</sub>) δ 7.73 (d, *J* = 7.8 Hz, 2H), 7.29 (d, *J* = 7.9 Hz, 2H), 4.82 (t, *J* = 6.4 Hz, 1H), 3.53 (t, *J* = 6.4 Hz, 1H), 2.88 (q, *J* = 6.8 Hz, 2H), 2.41 (s, 3H), 2.04 – 1.93 (m, 2H), 1.71 (t, *J* = 12.0 Hz, 2H), 1.62 – 1.51 (m, 2H), 1.42 (q, *J* = 7.1 Hz, 4H), 1.36 – 1.15 (m, 18H), 0.87 (t, *J* = 6.7 Hz, 3H).

**<sup>13</sup>C NMR** (125 MHz, CDCl<sub>3</sub>) δ 143.3, 137.1, 129.7, 127.1, 110.5, 110.4, 55.6, 55.5, 43.2, 31.8, 31.2, 31.1, 29.5, 29.3, 29.2, 29.0, 28.9, 28.8, 28.7, 27.2, 27.1, 26.4, 22.7, 21.6, 14.2.

**HRMS** (ESI-TOF) *m/z*: [M + Na]<sup>+</sup> calcd for C<sub>27</sub>H<sub>41</sub>N<sub>3</sub>O<sub>2</sub>S<sub>3</sub>Na, 558.2253, found 558.2263.

#### 4. Scaled-up reaction

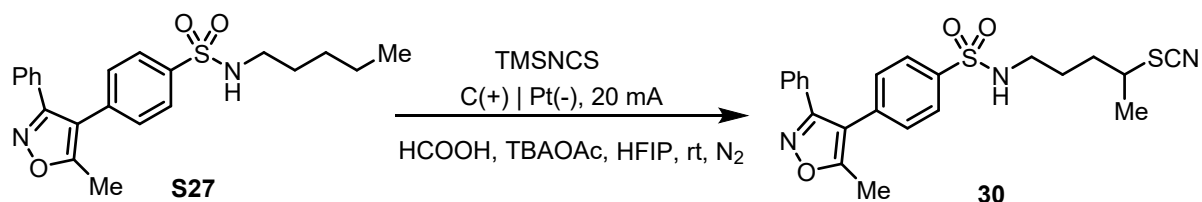

To a 150 mL beaker-type cell equipped with a carbon plate anode (3 cm x 3 cm x 0.3 cm, about 1.5 cm immersion depth in solution) and a platinum plate cathode (3 cm x 3 cm x 0.1 mm, about 1.5 cm immersion depth in solution) was charged with **S27** (0.38 g, 1.0 mmol, 1.0 equiv.), TMSNCS (0.20 g, 1.5 mmol, 1.5 equiv.), HCOOH (92 mg, 2.0 mmol, 2.0 equiv.), TBAOAc

(0.15 g, 0.5 mmol, 0.5 equiv.) and HFIP (20 mL). The electrolysis was carried out at room temperature using a constant current of 20 mA under N<sub>2</sub> for 15 h (11.2 F/mol). After completion of the reaction, the mixture was concentrated under reduced pressure. The residue was purified by column chromatography on silica gel eluting with petroleum ether/ethyl acetate (3:1) to give **30** as a yellow oil (0.28 g, 64% yield).

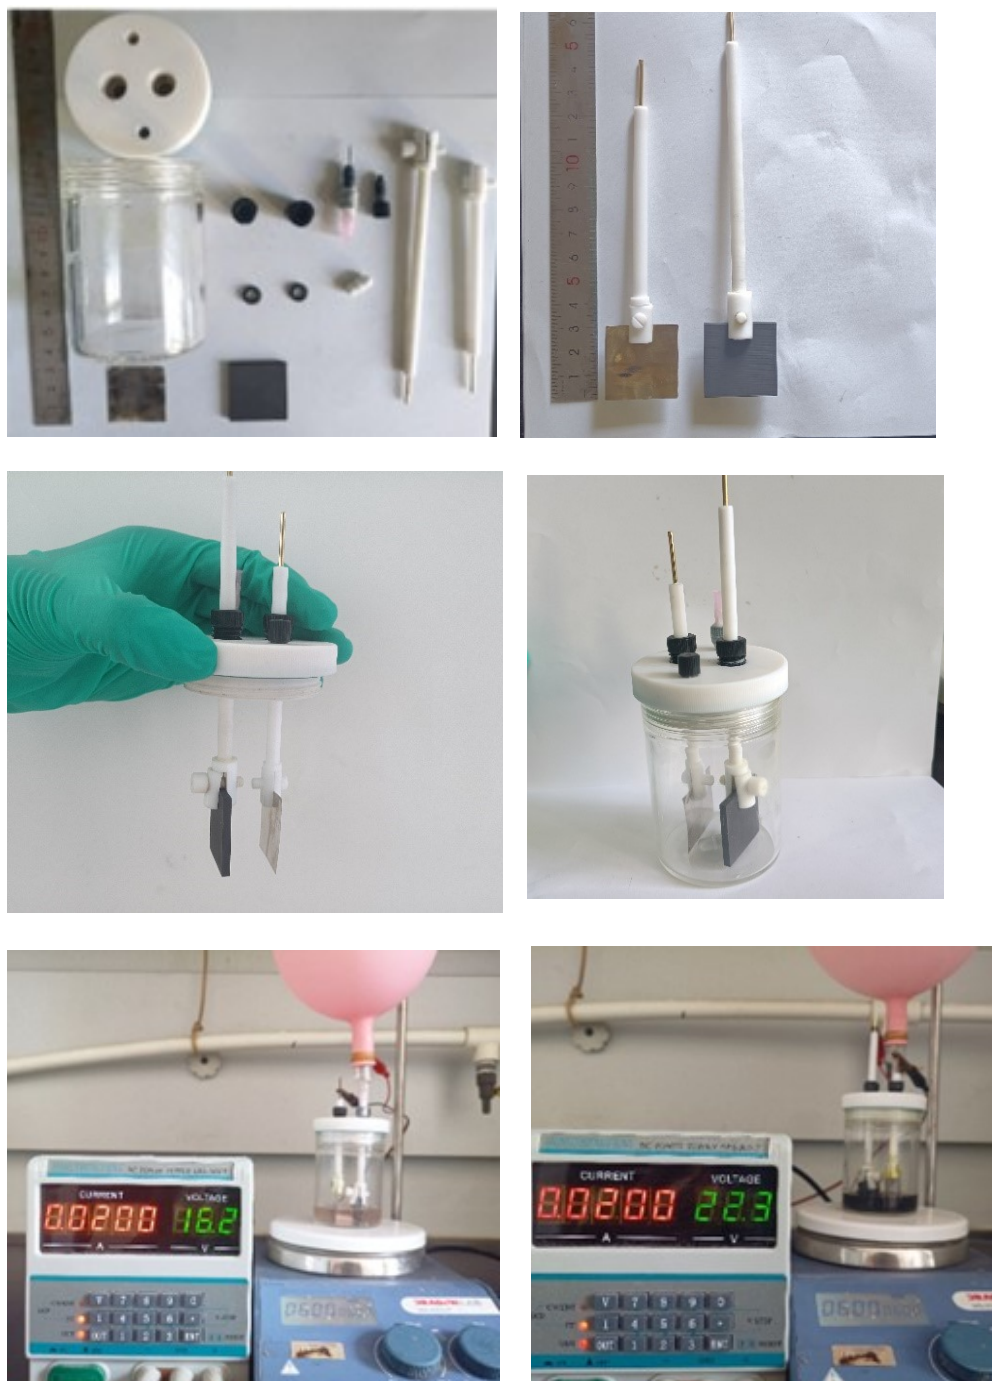

At the beginning of the reaction

At the end of the reaction

**Figure S2.** Electrolysis cell for large scale reaction



## 5. Follow-up transformations

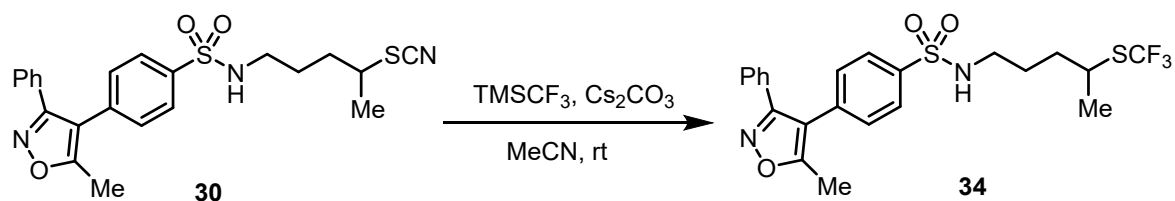

To a solution of **30** (88 mg, 0.2 mmol, 1.0 equiv.) in  $\text{CH}_3\text{CN}$  (1.5 mL) was added  $\text{TMSCF}_3$  (57 mg, 0.4 mmol, 2.0 equiv.) and  $\text{Cs}_2\text{CO}_3$  (65 mg, 0.2 mmol, 1.0 equiv.). The reaction mixture was stirred at room temperature for 5 h. After completion of the reaction (monitored by TLC), water (5 mL) was added to quench the reaction and the mixture was extracted with DCM. The organic layers were washed with brine, dried over  $\text{Na}_2\text{SO}_4$ , filtered, and evaporated. The residue was purified by column chromatography on silica gel with petroleum ether/ethyl acetate (5:1) to give **34** (72 mg, 74% yield) as a colorless oil.

$^1\text{H NMR}$  (500 MHz,  $\text{CDCl}_3$ )  $\delta$  7.85 (d,  $J = 7.9$  Hz, 2H), 7.45 – 7.28 (m, 7H), 4.70 (s, 1H), 3.26 (q,  $J = 6.3$  Hz, 1H), 3.03 (d,  $J = 5.3$  Hz, 2H), 2.49 (s, 3H), 1.69 – 1.62 (m, 4H), 1.39 (d,  $J = 6.9$  Hz, 3H).

$^{13}\text{C NMR}$  (125 MHz,  $\text{CDCl}_3$ )  $\delta$  167.4, 161.3, 139.4, 135.5, 131.2 (q,  $J_{\text{C-F}} = 304.5$  Hz), 130.5, 129.9, 128.9, 128.6, 127.5, 114.6, 43.0, 40.8, 33.9, 27.0, 22.5, 11.9.

**HRMS** (ESI-TOF)  $m/z$ :  $[\text{M} + \text{H}]^+$  calcd for  $\text{C}_{22}\text{H}_{24}\text{F}_3\text{N}_2\text{O}_3\text{S}_2$ , 485.1175, found 485.1169.

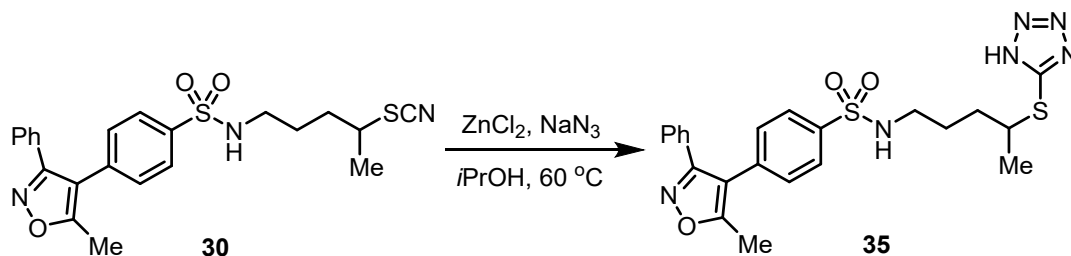

To a solution of **30** (88 mg, 0.2 mmol, 1.0 equiv.),  $\text{ZnCl}_2$  (27 mg, 0.2 mmol, 1.0 equiv.) in  $i\text{PrOH}$  (1.0 mL) was added  $\text{NaN}_3$  (33 mg, 0.5 mmol, 2.5 equiv.) in one portion. The reaction mixture was stirred at  $60^\circ\text{C}$  for 15 h. After cooling, the mixture was acidified with 10% HCl. The aqueous layer was extracted with ethyl acetate. The organic layers were washed with brine, dried over  $\text{Na}_2\text{SO}_4$ , filtered, and evaporated. The residue was purified by column chromatography on silica gel with (DCM/MeOH = 8:1) to give **35** (66 mg, 68% yield) as a white solid.

$^1\text{H NMR}$  (500 MHz,  $\text{CDCl}_3$ )  $\delta$  7.82 (d,  $J = 4.6$  Hz, 2H), 7.36 – 7.22 (m, 7H), 3.63 (s, 1H), 3.01 (s, 3H), 2.45 (s, 3H), 1.76 (s, 1H), 1.62 (s, 3H), 1.31 (s, 3H).

$^{13}\text{C}$  NMR (125 MHz,  $\text{CDCl}_3$ )  $\delta$  167.5, 161.0, 156.9, 139.0, 135.1, 130.3, 129.8, 128.8, 128.5, 127.6, 114.5, 42.0, 41.4, 33.6, 25.7, 20.5, 11.8.

HRMS (ESI-TOF)  $m/z$ :  $[\text{M} + \text{H}]^+$  calcd for  $\text{C}_{22}\text{H}_{25}\text{N}_6\text{O}_3\text{S}_2$ , 485.1424, found 485.1434.

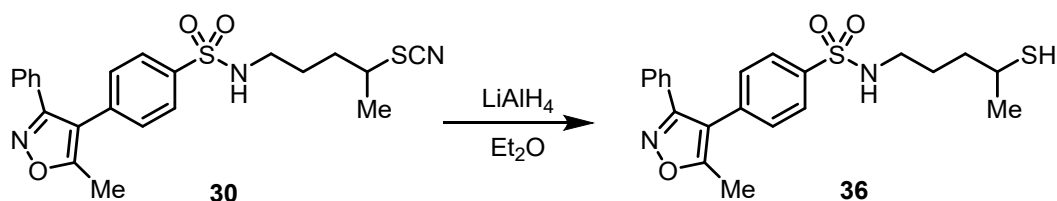

To a solution of **30** (88 mg, 0.2 mmol, 1.0 equiv.) was added dry  $\text{Et}_2\text{O}$  (3 mL) under  $\text{N}_2$ , and the suspension was cooled to  $0^\circ\text{C}$ . A solution of  $\text{LiAlH}_4$  (15 mg, 0.4 mmol, 2.0 equiv.) in dry  $\text{Et}_2\text{O}$  (3 mL) was slowly added, and the reaction was stirred at  $0^\circ\text{C}$  for 20 min. After completion of the reaction (monitored by TLC), the mixture was quenched by dropwise addition of 0.5 M  $\text{HCl}$ , diluted with  $\text{H}_2\text{O}$  and extracted with ethyl acetate. The organic layers were washed with brine, dried over  $\text{Na}_2\text{SO}_4$ , filtered, and evaporated. The residue was purified by column chromatography on silica gel with petroleum ether/ethyl acetate (6:1) to give **36** (79 mg, 95% yield) as a colorless oil.

$^1\text{H}$  NMR (500 MHz,  $\text{CDCl}_3$ )  $\delta$  7.84 (d,  $J = 8.3$  Hz, 2H), 7.40 – 7.28 (m, 7H), 4.96 (t,  $J = 6.3$  Hz, 1H), 3.01 (q,  $J = 6.4$  Hz, 2H), 2.87 – 2.81 (m, 1H), 2.48 (s, 3H), 1.67 – 1.54 (m, 3H), 1.49 – 1.43 (m, 1H), 1.40 (d,  $J = 6.5$  Hz, 1H), 1.28 (d,  $J = 6.7$  Hz, 3H).

$^{13}\text{C}$  NMR (100 MHz,  $\text{CDCl}_3$ )  $\delta$  167.4, 161.2, 139.3, 135.2, 130.4, 129.8, 128.8, 128.6, 128.5, 127.5, 114.6, 43.0, 37.6, 35.2, 27.6, 25.9, 11.9.

HRMS (ESI-TOF)  $m/z$ :  $[\text{M} + \text{H}]^+$  calcd for  $\text{C}_{21}\text{H}_{25}\text{N}_2\text{O}_3\text{S}_2$ , 417.1301, found 417.1299.

## 6. Mechanism study

### Cyclic voltammetry experiments

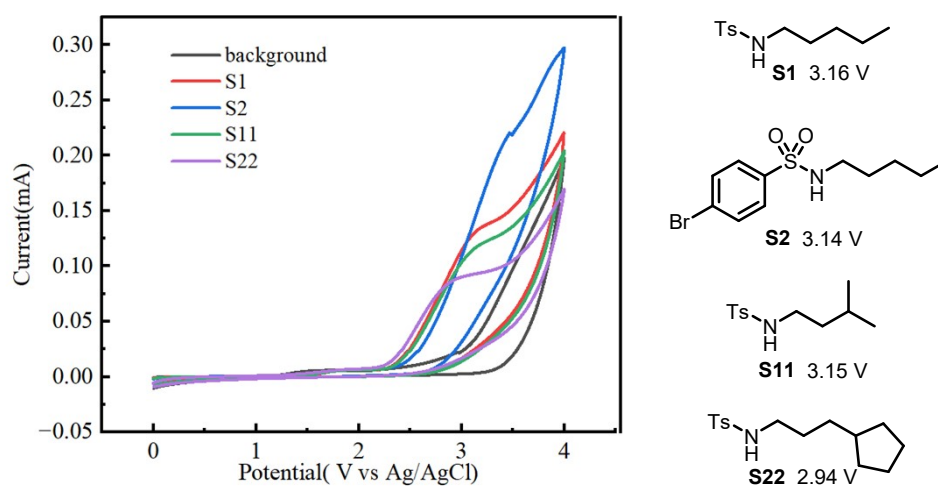

Figure S3. Cyclic voltammograms for sulfonamides

Cyclic voltammograms (CV) were performed with a CS electrochemical workstation (CS300H, CorrTest, China). CV analysis conditions: working electrode: glassy carbon disk; counter electrode: Pt wire; reference electrode: The reference was an Ag/AgCl electrode submerged in saturated aqueous KCl solution; solvent: HFIP (5 mL); scan rate:  $\nu = 100$  mV/s;  $c = 0.005$  M; supporting electrolyte:  $n\text{Bu}_4\text{NBF}_4$  (0.1 M).

### Radical probe experiments

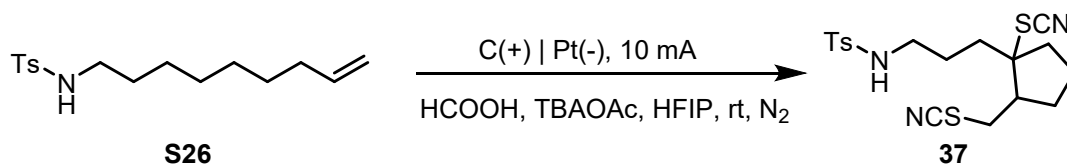

To a 10 mL three-necked flask equipped with a carbon plate anode (3 cm x 1 cm x 0.3 cm, about 1.5 cm immersion depth in solution) and a platinum plate cathode (1 cm x 1 cm x 0.1 mm) was charged with **S26** (59 mg, 0.2 mmol, 1.0 equiv.), TMSNCS (39 mg, 0.3 mmol, 1.5 equiv.), HCOOH (18 mg, 0.4 mmol, 2.0 equiv.), TBAOAc (30 mg, 0.1 mmol, 0.5 equiv.) and HFIP (5 mL). The electrolysis was carried out at room temperature using a constant current of 10 mA under  $\text{N}_2$  for 2 h (3.7 F/mol). After completion of the reaction, the mixture was concentrated under reduced pressure. The residue was purified by column chromatography on silica gel with petroleum ether/ethyl acetate (5:1) to give **37** as a yellow oil (51 mg, 62% yield).

**$^1\text{H}$  NMR** (500 MHz,  $\text{CDCl}_3$ )  $\delta$  7.73 (d,  $J = 8.2$  Hz, 2H), 7.29 (d,  $J = 7.9$  Hz, 2H), 4.86 (t,  $J = 6.3$  Hz, 1H), 3.35 – 3.31 (m, 2H), 2.89 (q,  $J = 6.7$  Hz, 2H), 2.41 (s, 3H), 2.04 – 1.93 (m, 1H), 1.77 – 1.69 (m, 1H), 1.62 – 1.49 (m, 1H), 1.47 – 1.37 (m, 3H), 1.30 – 1.23 (m, 5H).

**$^{13}\text{C}$  NMR** (125 MHz,  $\text{CDCl}_3$ )  $\delta$  143.4, 137.0, 129.8, 127.1, 111.1, 109.3, 50.8, 50.0, 43.1, 39.1, 33.2, 29.4, 28.6, 26.6, 26.3, 21.6.

**HRMS** (ESI-TOF)  $m/z$ :  $[\text{M} + \text{Na}]^+$  calcd for  $\text{C}_{18}\text{H}_{23}\text{N}_3\text{O}_2\text{S}_3\text{Na}$ , 432.0845, found 432.0848.

## 7. Unsuccessful substrates

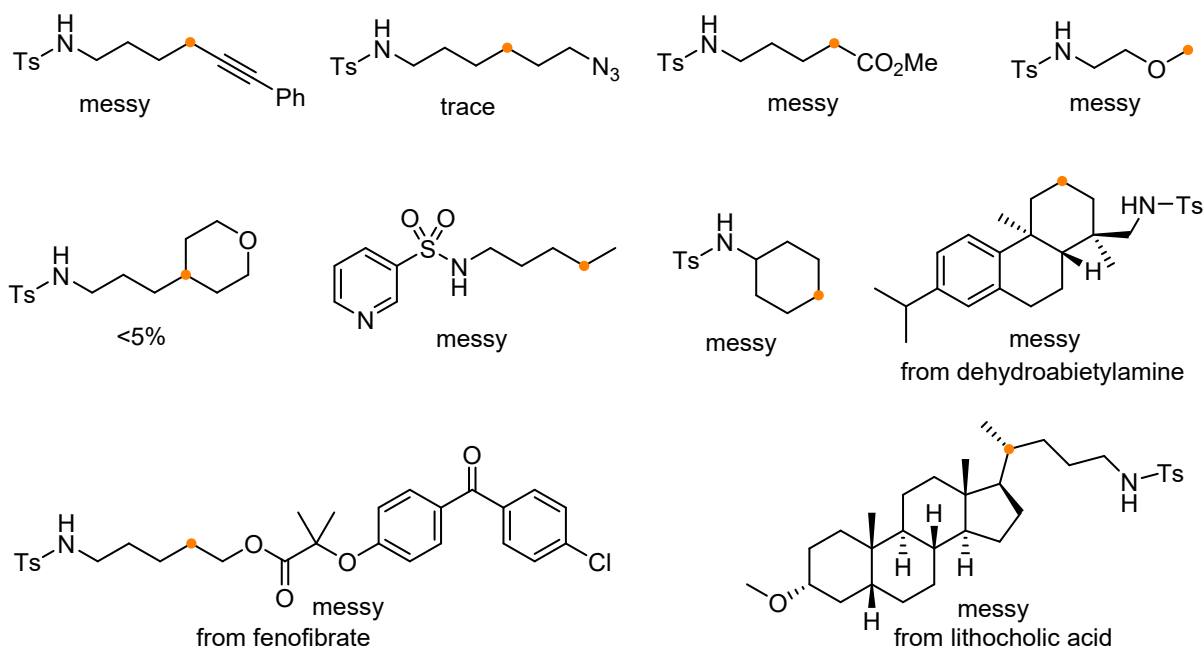

## 8. Synthesis of substrates

### General procedure for the synthesis of sulfonamide (GP1)

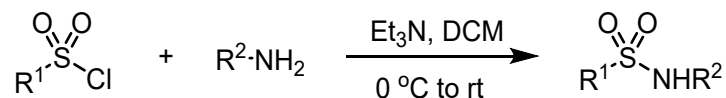

To a round bottom flask was added sulfonyl chloride (3 mmol, 1.0 equiv.) and dry DCM (12 mL), the mixture was cooled to 0 °C. Amine (3.3 mmol, 1.1 equiv.) and Et<sub>3</sub>N (3.6 mmol, 1.2 equiv.) were added into the solution. The reaction mixture was warmed to room temperature and the stirring was continued until the starting material was consumed completely as indicated by TLC. The reaction mixture was quenched with 1.0 M HCl and extracted with DCM. The organic layers were combined, washed with brine, dried over anhydrous Na<sub>2</sub>SO<sub>4</sub>, and concentrated in vacuo. The residue was purified by column chromatography on silica gel to afford the corresponding sulfonamide.

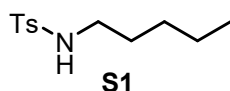

Following **GP1** with tosyl chloride and amylamine. The crude was purified by column chromatography on silica gel with petroleum ether/ethyl acetate (10:1) to give **S1** (0.67 g, 92%) as a yellow oil. <sup>[3]</sup>

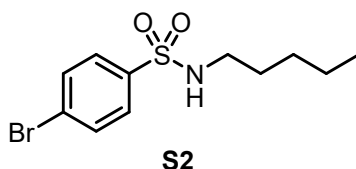

Following **GP1** with 4-bromobenzenesulfonyl chloride and amylamine. The crude was purified by column chromatography on silica gel with petroleum ether/ethyl acetate (10:1) to give **S2** (0.69 g, 75%) as a yellow oil. [4]

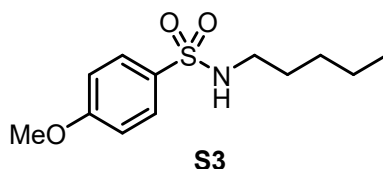

Following **GP1** with 4-methoxybenzenesulfonyl chloride and amylamine. The crude was purified by column chromatography on silica gel with petroleum ether/ethyl acetate (8:1) to give **S3** (0.66 g, 86%) as a yellow oil. [5]

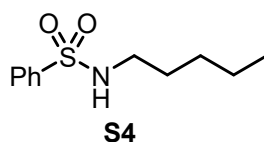

Following **GP1** with benzenesulfonyl chloride and amylamine. The crude was purified by column chromatography on silica gel with petroleum ether/ethyl acetate (10:1) to give **S4** (0.61 g, 89%) as a colorless oil. [5]

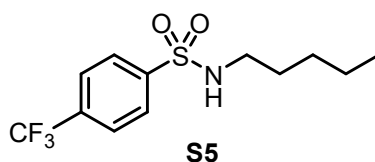

Following **GP1** with 4-(trifluoromethyl)benzene sulfonyl chloride and amylamine. The crude was purified by column chromatography on silica gel with petroleum ether/ethyl acetate (8:1) to give **S5** (0.80 g, 90%) as a white solid.

**<sup>1</sup>H NMR** (400 MHz, CDCl<sub>3</sub>) δ 8.01 (d, *J* = 8.2 Hz, 2H), 7.78 (d, *J* = 8.3 Hz, 2H), 4.96 (t, *J* = 6.1 Hz, 1H), 2.96 (q, *J* = 6.8 Hz, 2H), 1.50 – 1.43 (m, 2H), 1.26 – 1.20 (m, 4H), 0.82 (t, *J* = 6.8 Hz, 3H).

**<sup>13</sup>C NMR** (100 MHz, CDCl<sub>3</sub>) δ 143.8, 134.4 (q, *J*<sub>C-F</sub> = 33.1 Hz), 127.7, 126.4 (q, *J*<sub>C-F</sub> = 3.7 Hz), 123.4 (q, *J*<sub>C-F</sub> = 272.8 Hz), 43.4, 29.4, 28.7, 22.2, 13.9.

HRMS (ESI-TOF) *m/z*: [M + H]<sup>+</sup> calcd for C<sub>12</sub>H<sub>17</sub>F<sub>3</sub>NO<sub>2</sub>S, 296.0927, found 296.0933.

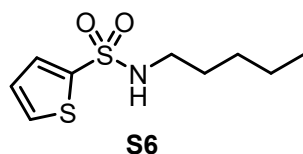

Following **GP1** 2-thiophenesulfonyl chloride and amylamine. The crude was purified by column chromatography on silica gel with petroleum ether/ethyl acetate (10:1) to give **S6** (0.60 g, 86%) as a colorless oil. [6]

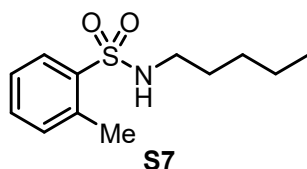

Following **GP1** *o*-toluenesulfonyl chloride and amylamine. The crude was purified by column chromatography on silica gel with petroleum ether/ethyl acetate (10:1) to give **S7** (0.57 g, 79%) as a colorless oil. [6]

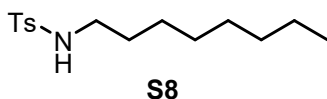

Following **GP1** tosyl chloride and octylamine. The crude was purified by column chromatography on silica gel with petroleum ether/ethyl acetate (10:1) to give **S8** (0.76 g, 90%) as a colorless oil. [7]

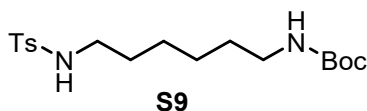

Following **GP1** tosyl chloride and *N*-Boc-1,6-diaminohexane. The crude was purified by column chromatography on silica gel with petroleum ether/ethyl acetate (3:1) to give **S9** (0.94 g, 85%) as a white solid.

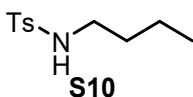

Following **GP1** with tosyl chloride and butylamine. The crude was purified by column chromatography on silica gel with petroleum ether/ethyl acetate (10:1) to give **S10** (0.61 g, 90%) as a yellow oil. [8]

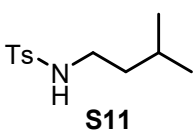

Following **GP1** with tosyl chloride and isoamylamine. The crude was purified by column chromatography on silica gel with petroleum ether/ethyl acetate (10:1) to give **S11** (0.59 g, 82%) as a yellow oil. <sup>[9]</sup>

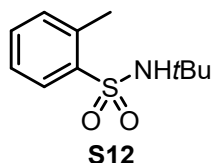

Following **GP1** with *o*-toluenesulfonyl chloride and tert-butylamine. The crude was purified by column chromatography on silica gel with petroleum ether/ethyl acetate (15:1) to give **S12** (0.55 g, 80%) as a white solid. <sup>[10]</sup>

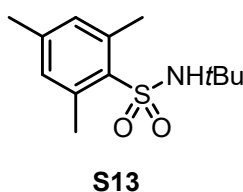

Following **GP1** with mesitylene-2-sulfonyl chloride and tert-butylamine. The crude was purified by column chromatography on silica gel with petroleum ether/ethyl acetate (15:1) to give **S13** (0.60 g, 79%) as a white solid. <sup>[11]</sup>

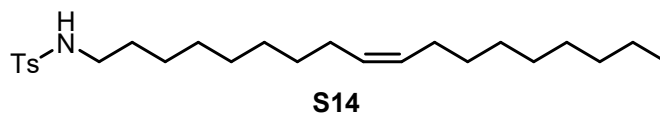

Following **GP1** tosyl chloride and oleylamine. The crude was purified by column chromatography on silica gel with petroleum ether/ethyl acetate (8:1) to give **S14** (1.02 g, 81%) as a white solid. <sup>[12]</sup>

### General procedure for the synthesis of sulfonamide (**GP2**)

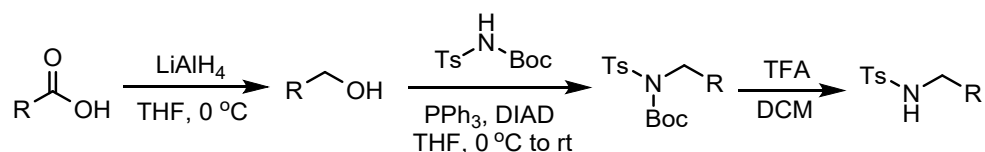

To a round bottom flask was added the acid (3 mmol, 1.0 equiv.) and dry THF (12 mL), the mixture was cooled to 0 °C. LiAlH<sub>4</sub> (0.17 g, 4.5 mmol, 1.5 equiv.) was added into the solution under N<sub>2</sub>. The reaction mixture was warmed to room temperature and the stirring was continued until the starting material was consumed completely as indicated by TLC. The reaction mixture was quenched carefully with water at 0 °C and allowed to stir for about 10 min. The mixture was filtered and extracted with ethyl acetate. The organic extracts were combined, washed with

brine, and dried over anhydrous Na<sub>2</sub>SO<sub>4</sub>. The organic layer was concentrated in vacuo to obtain the alcohol.

To a round bottom flask was added alcohol, PPh<sub>3</sub> (1.1 equiv.), tert-butyl tosylcarbamate (1.1 equiv.) and dry THF (12 mL). The mixture was stirred for 10 min then cooled to 0 °C. DIAD (1.1 equiv.) was added and the mixture was stirred overnight at room temperature. Upon completion, the mixture was concentrated and purified by column chromatography on silica gel to give the Boc-protected amide.

To a round bottom flask was added Boc-protected amide and DCM (0.25 M), then TFA (5.0 equiv.) was added. The reaction was stirred for 3 h at room temperature. The mixture was concentrated and purified by column chromatography on silica gel to give the corresponding amide.

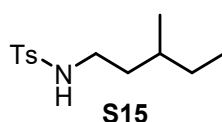

Following **GP2** with 3-methylpentanoic acid. The crude was purified by column chromatography on silica gel with petroleum ether/ethyl acetate (10:1) to give **S15** (0.60 g, 78%) as a colorless oil. [13]

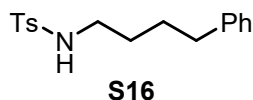

Following **GP2** with 4-phenylbutyric acid. The crude was purified by column chromatography on silica gel with petroleum ether/ethyl acetate (5:1) to give **S16** (0.64 g, 70%) as a white solid. [3]

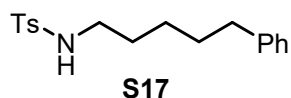

Following **GP2** with 5-phenylvaleric acid. The crude was purified by column chromatography on silica gel with petroleum ether/ethyl acetate (8:1) to give **S17** (0.74 g, 78%) as a white solid. [14]

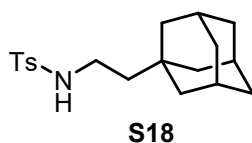

Following **GP2** with 1-adamantaneacetic acid. The crude was purified by column chromatography on silica gel with petroleum ether/ethyl acetate (10:1) to give **S18** (0.65 g, 65%) as a white solid. [14]



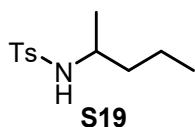

Following **GP2** with 2-pentanol. The crude was purified by column chromatography on silica gel with petroleum ether/ethyl acetate (8:1) to give **S19** (0.45 g, 62%) as a colorless oil.<sup>[13]</sup>

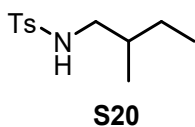

Following **GP2** with 2-methyl-1-butanol. The crude was purified by column chromatography on silica gel with petroleum ether/ethyl acetate (8:1) to give **S20** (0.53 g, 73%) as a colorless oil.<sup>[16]</sup>

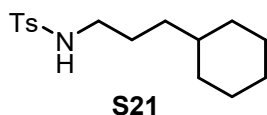

Following **GP2** with cyclohexanepropionic acid. The crude was purified by column chromatography on silica gel with petroleum ether/ethyl acetate (10:1) to give **S21** (0.56 g, 63%) as a white solid.<sup>[14]</sup>

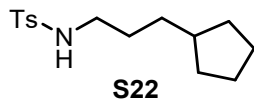

Following **GP2** with 3-cyclopentylpropionic acid. The crude was purified by column chromatography on silica gel with petroleum ether/ethyl acetate (10:1) to give **S22** (0.48 g, 57%) as a white solid.<sup>[13]</sup>

### General procedure for the synthesis of sulfonamide (GP3)

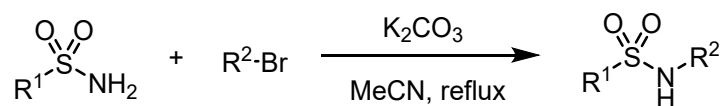

To a round bottom flask was added alkyl bromide (3 mmol, 1.0 equiv.), sulfonamide (6 mmol, 2.0 equiv.),  $\text{K}_2\text{CO}_3$  (0.83 g, 6 mmol, 2.0 equiv.) and MeCN (12 mL). The reaction mixture was heated to reflux for 5 h. The mixture was filtrated through celite and concentrated in vacuo. The crude was purified by column chromatography on silica gel to give the corresponding amide.

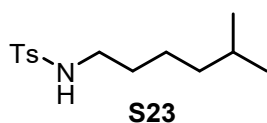

Following **GP3** with *p*-toluenesulfonamide and 1-bromo-5-methylhexane. The crude was purified by column chromatography on silica gel with petroleum ether/ethyl acetate (8:1) to give **S23** (0.63 g, 78%) as a colorless oil. [13]

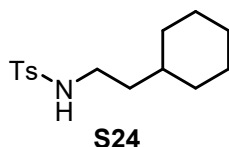

Following **GP3** with *p*-toluenesulfonamide and 1-bromo-2-cyclohexyl. The crude was purified by column chromatography on silica gel with petroleum ether/ethyl acetate (10:1) to give **S24** (0.53 g, 63%) as a white solid. [4]

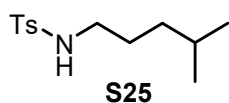

Following **GP3** with *p*-toluenesulfonamide and 1-bromo-4-methylpentane. The crude was purified by column chromatography on silica gel with petroleum ether/ethyl acetate (8:1) to give **S25** (0.57 g, 75%) as a colorless oil. [7]

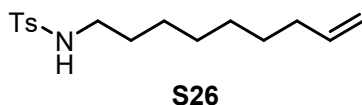

Following **GP3** with *p*-toluenesulfonamide and 9-bromo-1-decene. The crude was purified by column chromatography on silica gel with petroleum ether/ethyl acetate (10:1) to give **S26** (0.71 g, 80%) as a white solid. [17]

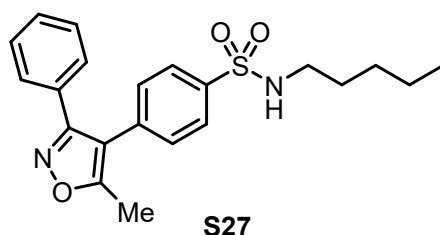

Following **GP3** with valdecoxib and 1-bromopentane. The crude was purified by column chromatography on silica gel with petroleum ether/ethyl acetate (5:1) to give **S27** (0.75 g, 65%) as a white solid.

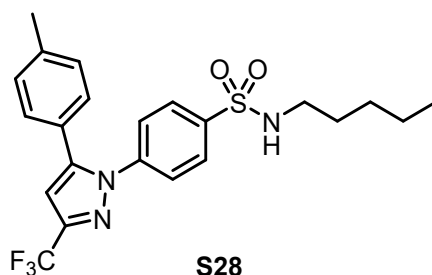

Following **GP3** with celecoxib and 1-bromopentane. The crude was purified by column chromatography on silica gel with petroleum ether/ethyl acetate (5:1) to give **S28** (0.69 g, 51%) as a white solid.

**(S)-4-methyl-2-((4-methylphenyl) sulfonamido) pentyl benzoate (S29)**

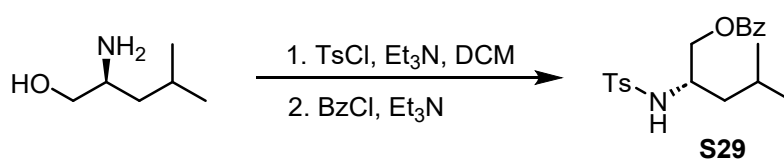

To a round bottom flask was added L(+)-Leucinol (0.35 g, 3 mmol, 1.0 equiv.) and dried DCM (6 mL). The mixture was cooled to 0 °C, Et<sub>3</sub>N (1.25 mL, 9 mmol, 3.0 equiv.) and tosyl chloride (0.57 g, 3 mmol, 1.0 equiv.) were added slowly. The reaction was warmed to room temperature and stirred overnight. After completion, the solvent was evaporated and the residue was dissolved in dried DCM (6 mL), then Et<sub>3</sub>N (1.25 mL, 9 mmol, 3.0 equiv.) and BzCl (0.51 g, 3.6 mmol, 1.2 equiv.) were added. The reaction mixture was warmed to room temperature and stirred for 8 h. The mixture was quenched by water and extracted with DCM. The organic layers were combined, washed with brine, and dried over anhydrous Na<sub>2</sub>SO<sub>4</sub>. The crude was purified by column chromatography on silica gel with petroleum ether/ethyl acetate (5:1) to give **S29** (0.57 g, 51%) as a yellow solid. <sup>[18]</sup>

**N-(1-(3-chlorophenyl) pentyl)-4-methylbenzenesulfonamide (S30)**

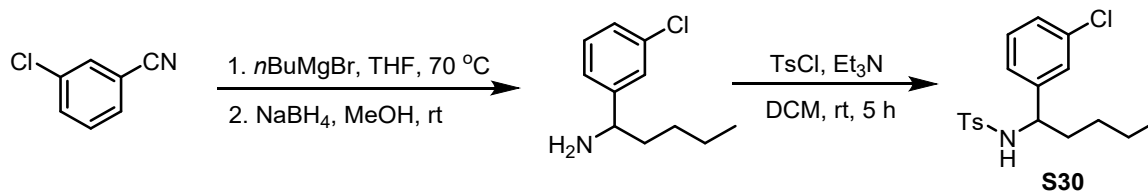

To a solution of *n*BuMgBr (15 mmol, 3.0 equiv.) in THF (20 mL) was added 3-chlorobenzonitrile (0.69 g, 5 mmol, 1.0 equiv.). The reaction mixture was heated at 70 °C for 4 h under vigorous stirring. After cooling to room temperature, a solution of sodium borohydride (0.38 g, 10 mmol, 2.0 equiv.) in MeOH (25 mL) was added to the reaction mixture. After stirring for 15 min, the mixture was quenched with aqueous NaOH solution (1.0 M), and extracted with

ethyl acetate. The combined organic layers were washed with brine, dried over anhydrous  $\text{Na}_2\text{SO}_4$  and concentrated to give the crude amine.

The last step was following **GP1** with 1-(3-chlorophenyl) pentan-1-amine (0.65 g, 3.3 mmol, 1.1 equiv.) and tosyl chloride (0.57 g, 3 mmol, 1.0 equiv.). The crude was purified by column chromatography on silica gel with petroleum ether/ethyl acetate (8:1) to give **S30** (0.66 g, 63%) as a yellow oil. [19]

#### ***N*-(6-bromohexyl)-4-methylbenzenesulfonamide (S31)**

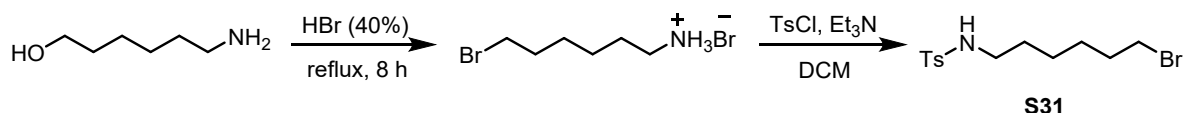

To a round bottom flask was added 6-aminohexanol (0.70 g, 5 mmol) and 40% HBr (6 mL). The mixture was refluxed for 8 h, and concentrated to give 6-bromohexylamine hydrobromide (1.14 g, 88%) as a yellow solid.

The last step was following **GP1** with 6-bromohexan-1-aminium bromide (0.85 g, 3.3 mmol, 1.1 equiv.) and tosyl chloride (0.57 g, 3 mmol, 1.0 equiv.). The crude was purified by column chromatography on silica gel with petroleum ether/ethyl acetate (5:1) to give **S31** (0.83 g, 83%) as a yellow solid. [20]

#### **4-(5-(4-fluorophenyl)-3-(trifluoromethyl)-1H-pyrazol-1-yl)-*N*-pentylbenzenesulfonamide (S32)**

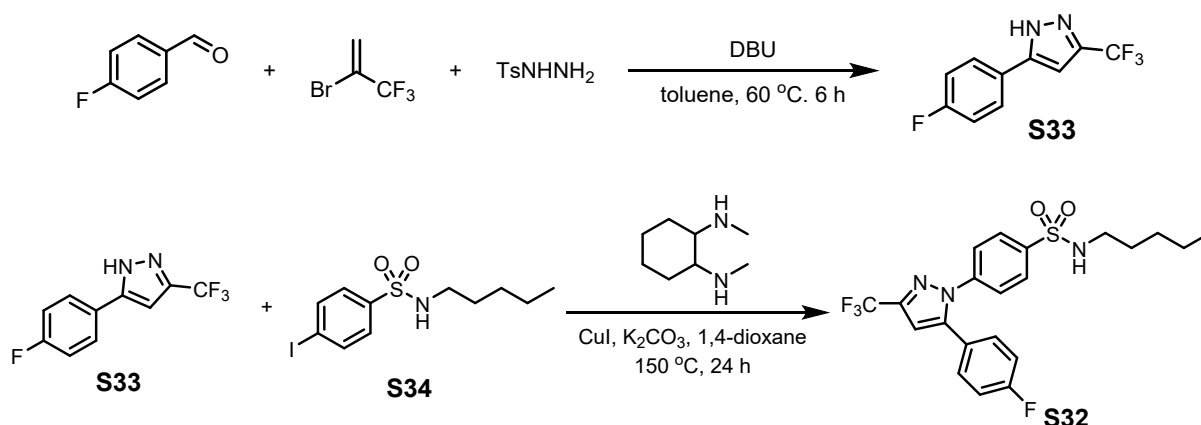

To a round bottom flask was added 4-fluorobenzaldehyde (0.37 g, 3 mmol, 1.0 equiv.), 4-methylbenzenesulfonohydrazide (0.67 g, 3.6 mmol, 1.2 equiv.), 1,8-diazabicyclo[5.4.0]undec-7-ene (1.37 g, 9 mmol, 3.0 equiv.), 2-bromo-3,3,3-trifluoropropene (1.05 g, 6 mmol, 2.0 equiv.), and toluene (18 mL). The resulting mixture was vigorously stirred at 60 °C for 6 h. The reaction mixture was quenched with water and extracted with ethyl acetate. The combined organic layers

were washed with brine, dried over anhydrous Na<sub>2</sub>SO<sub>4</sub>, and concentrated in vacuo. The crude was purified by column chromatography on silica gel with petroleum ether/ethyl acetate (10:1) to give **S33** (0.50 g, 72%) as a yellow solid.

The **S34** was synthesized following **GP1** with 4-iodobenzenesulfonyl chloride (3.63 g, 12 mmol, 1.0 equiv.) and amylamine (1.15 g, 13.2 mmol, 1.1 equiv.). The crude was purified by column chromatography on silica gel with petroleum ether/ethyl acetate (10:1) to give **S34** (4.15 g, 98%) as a white solid.

To a Schlenk tube was added **S33** (0.46 g, 2 mmol, 1.0 equiv.), **S34** (3.18 g, 9 mmol, 4.5 equiv.), CuI (0.19 g, 1 mmol, 0.5 equiv.), K<sub>2</sub>CO<sub>3</sub> (0.55 g, 4 mmol, 2.0 equiv.) and 1,4-dioxane (8 mL). *N, N'*-dimethyl-1,2-cyclohexanediamine (0.14 g, 1 mmol, 1.0 equiv.) was slowly injected into the system under Ar. The resulting mixture was vigorously stirred at 150 °C for 24 h under Ar. The mixture was concentrated in vacuo and purified by column chromatography on silica gel with petroleum ether/ethyl acetate (20:1) to give **S32** (0.30 g, 33%) as a colorless oil.

## 9. Copies of NMR spectra

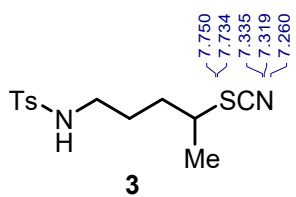

<sup>1</sup>H NMR  
 500 MHz  
 CDCl<sub>3</sub>

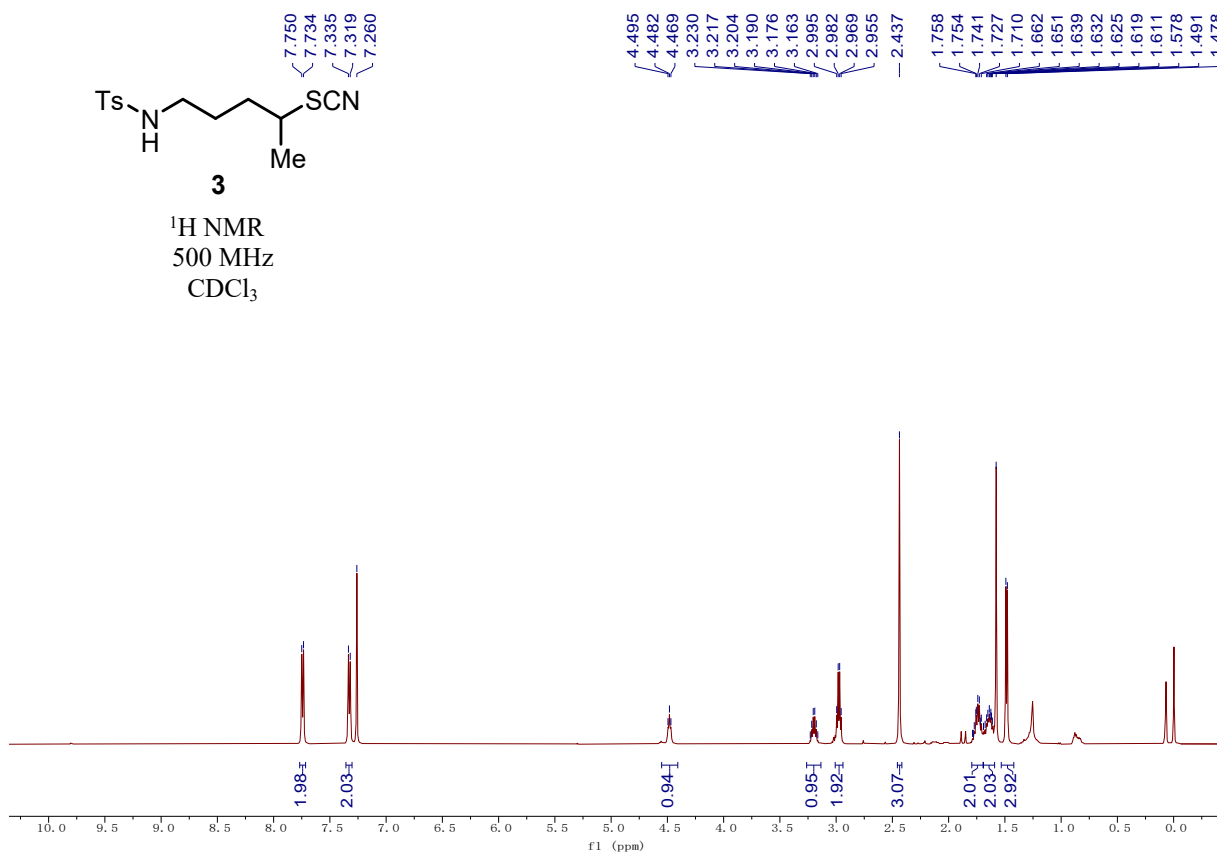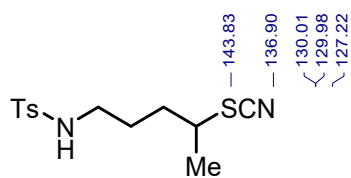

<sup>13</sup>C NMR  
 125 MHz  
 CDCl<sub>3</sub>

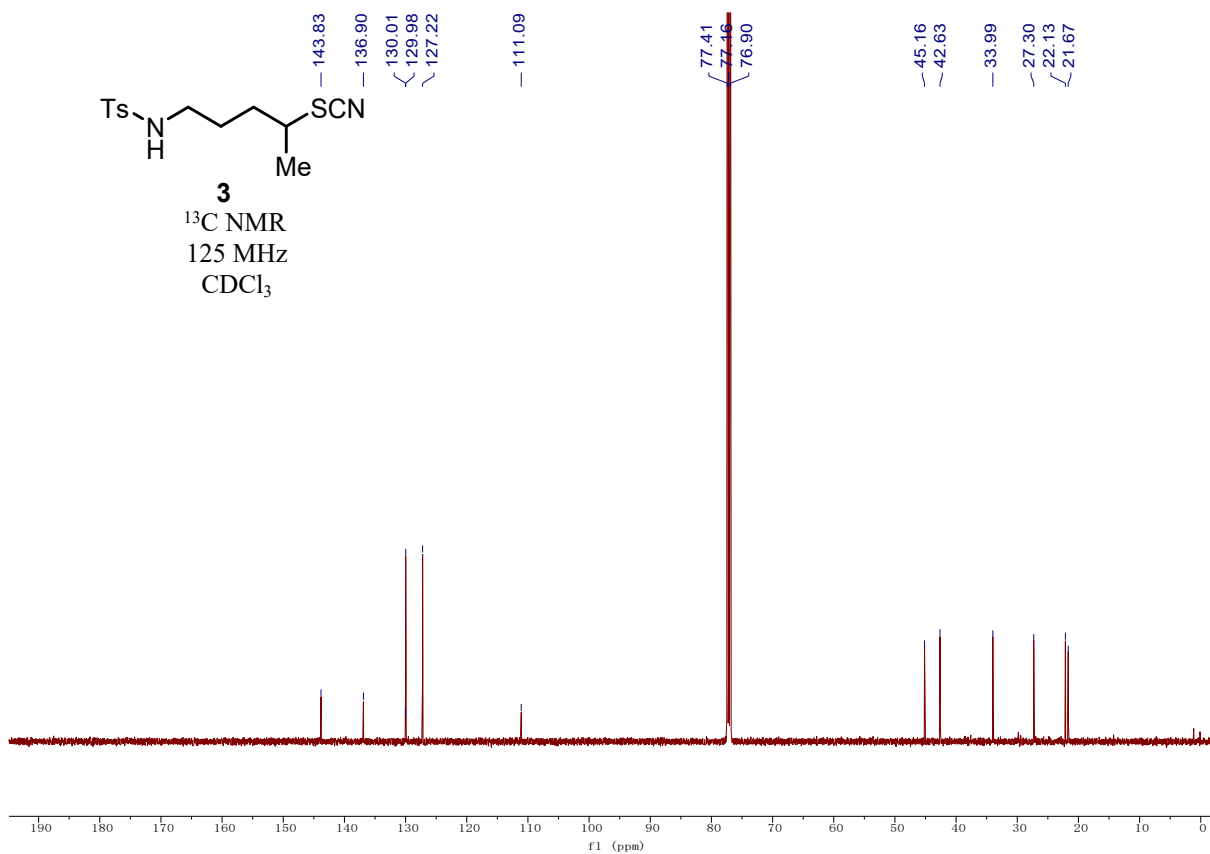

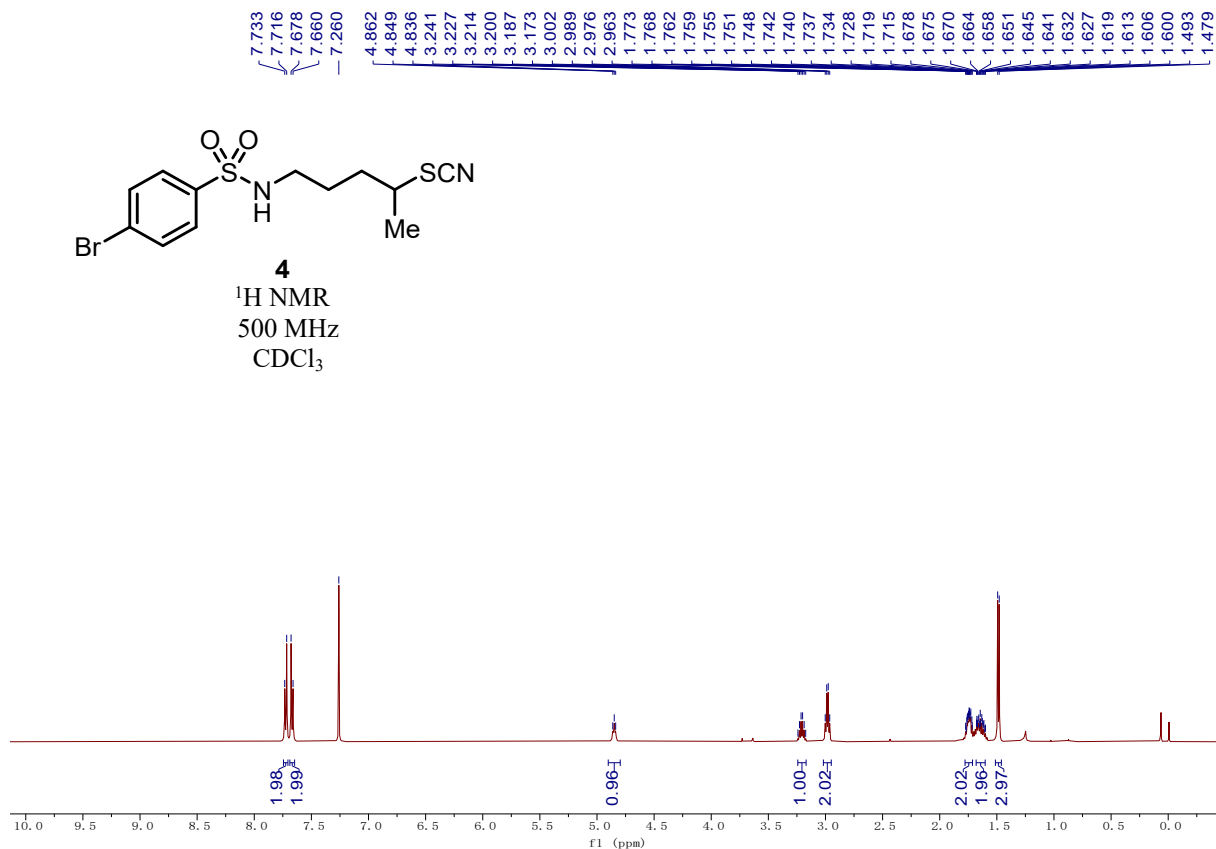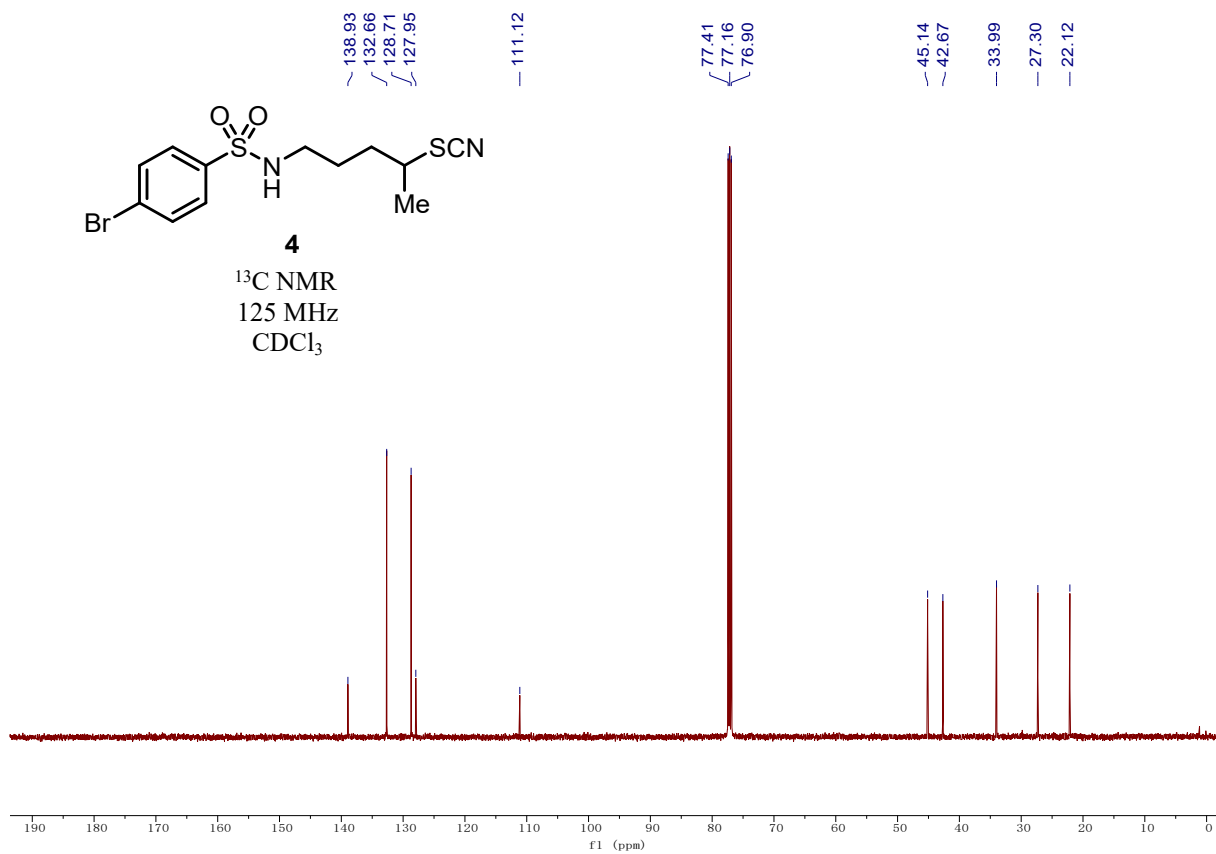

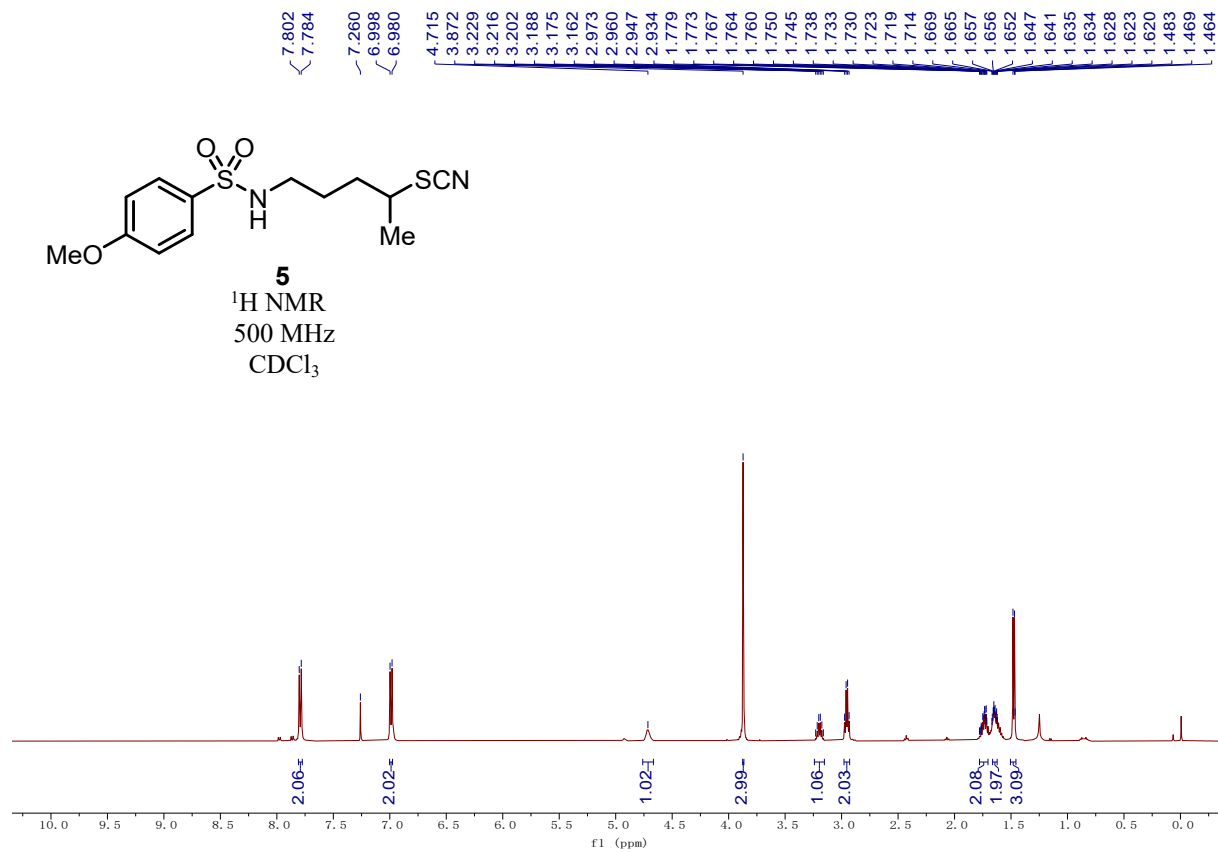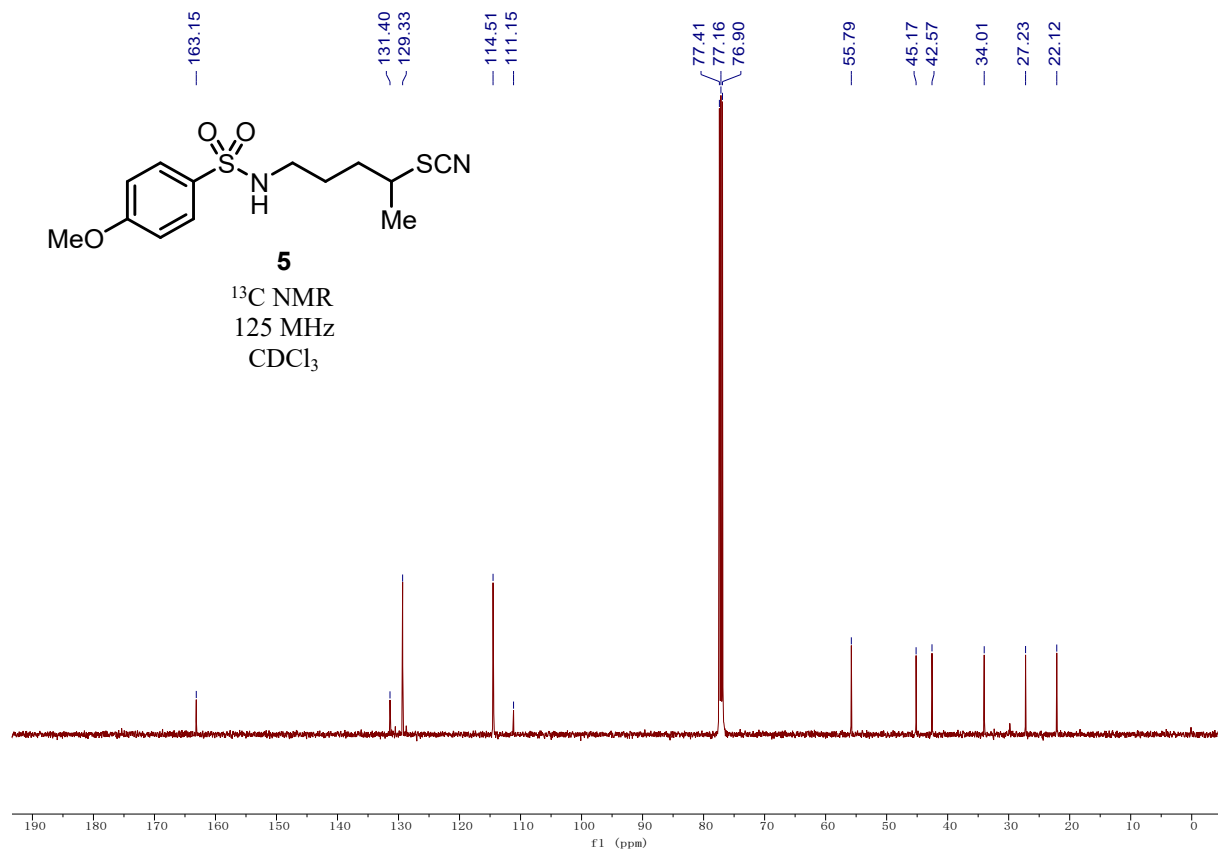



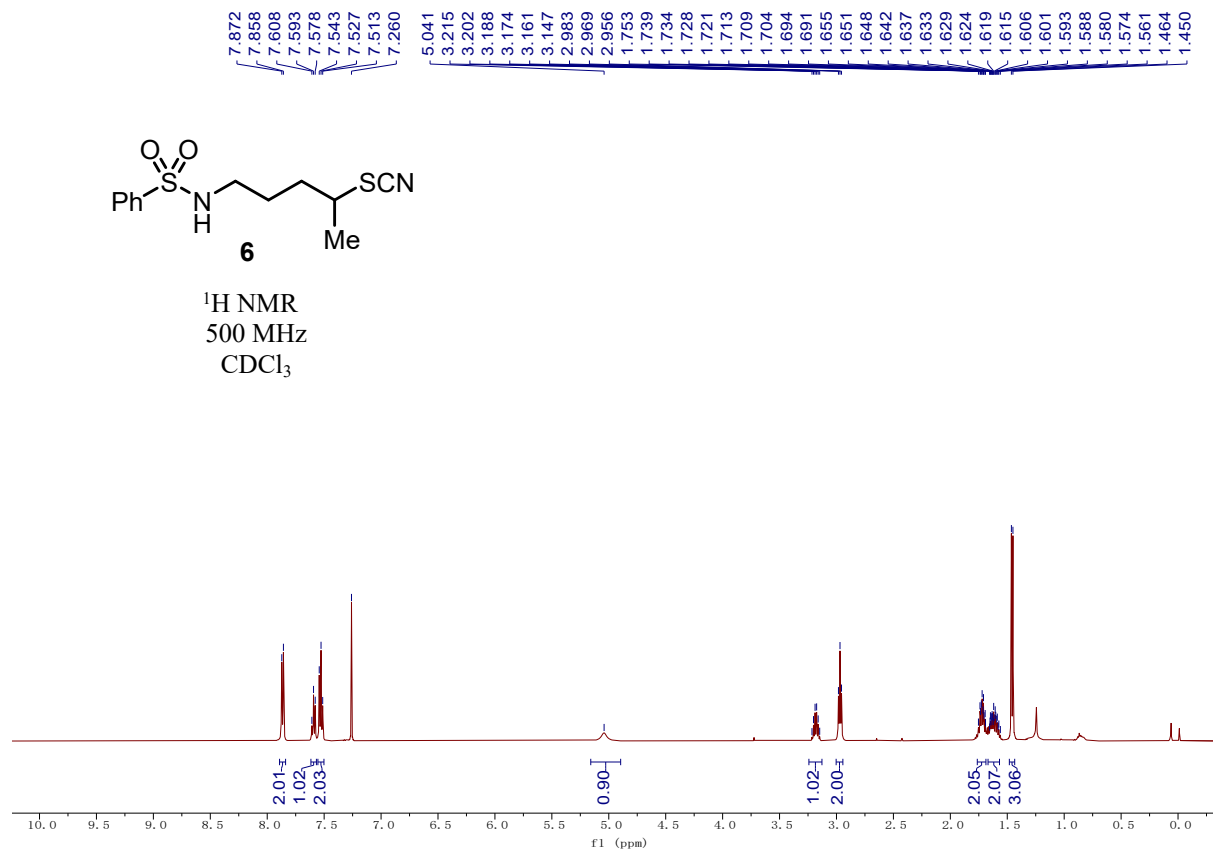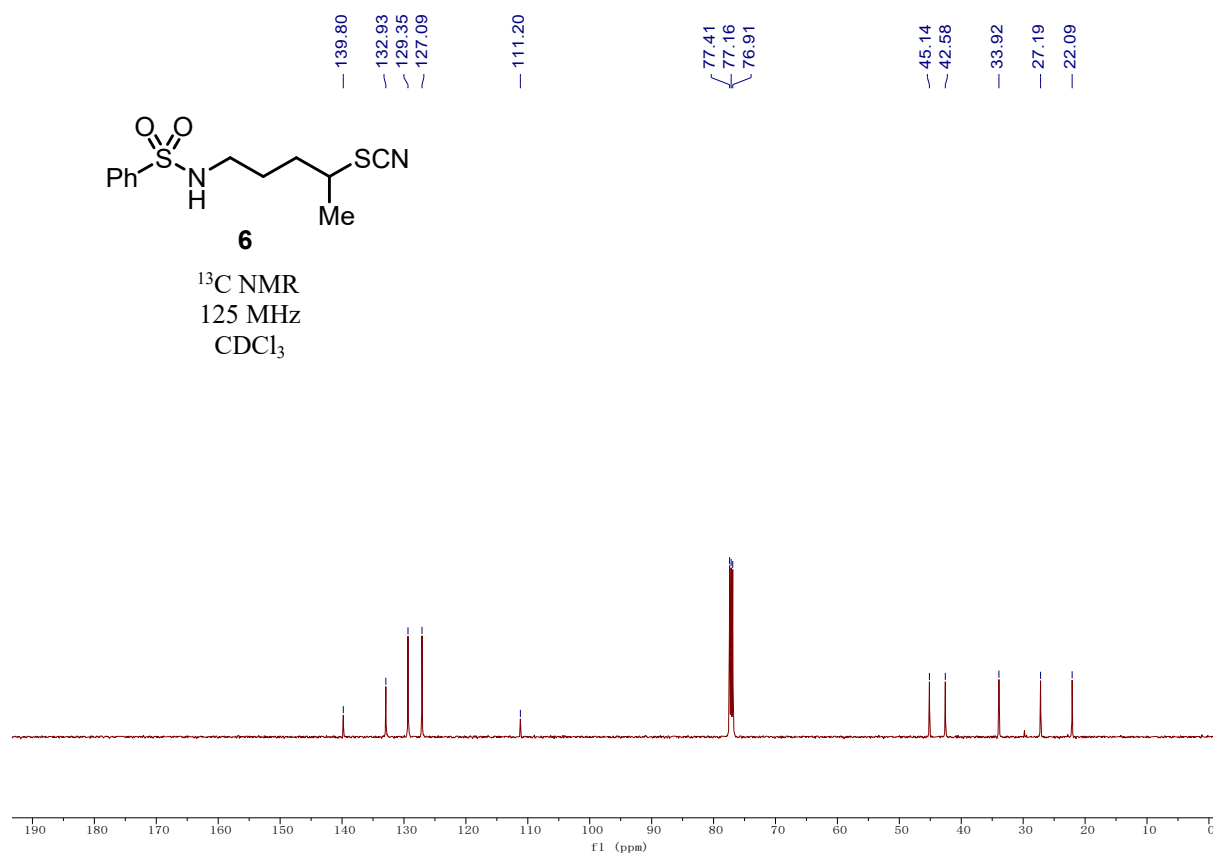

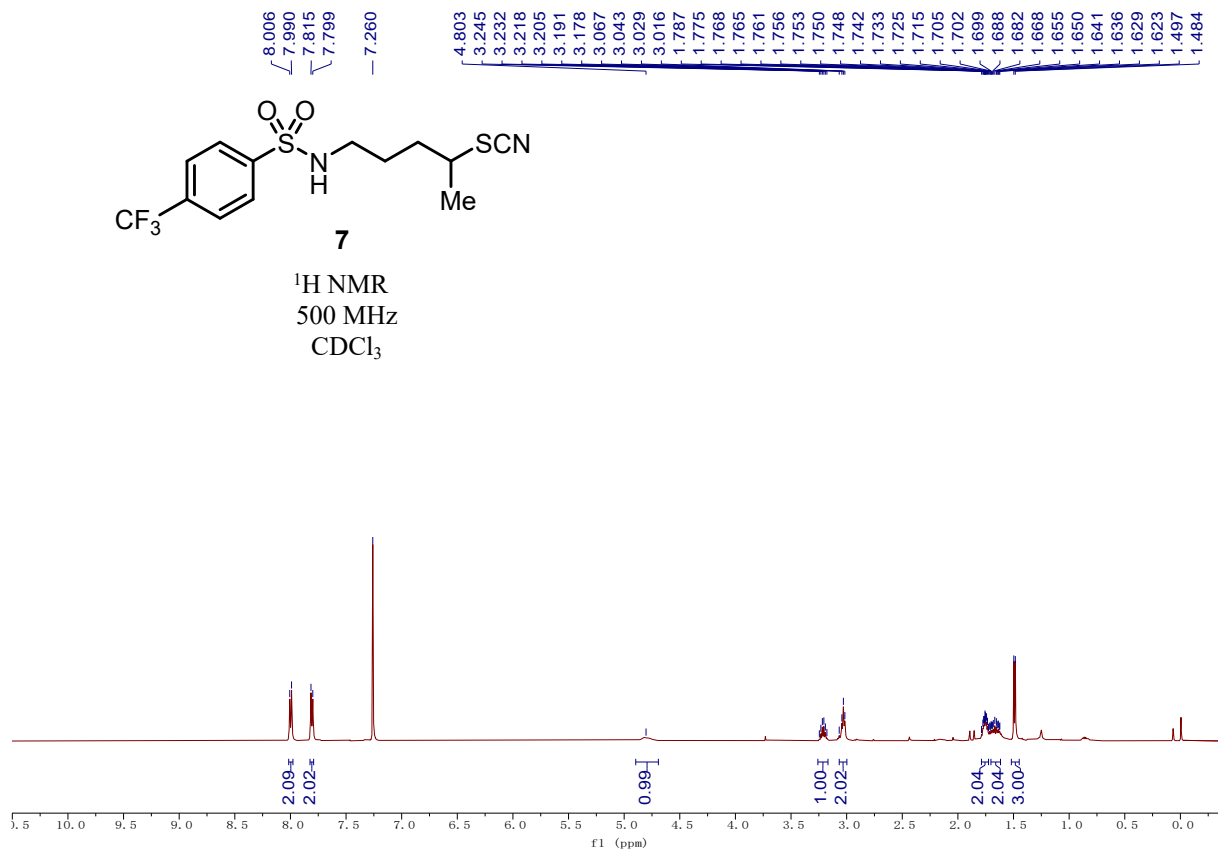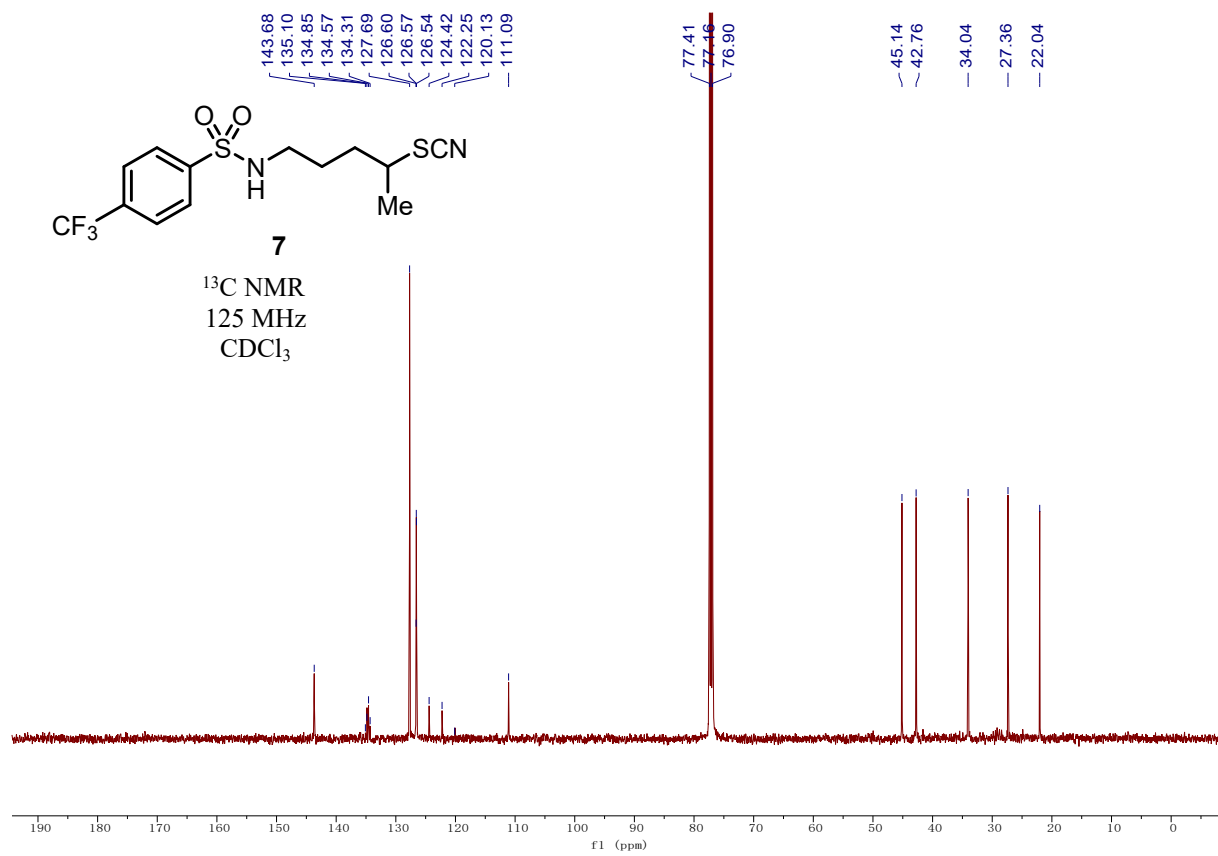

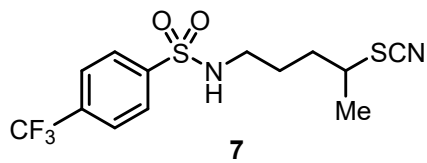

$^{19}\text{F}$  NMR  
376 MHz  
 $\text{CDCl}_3$

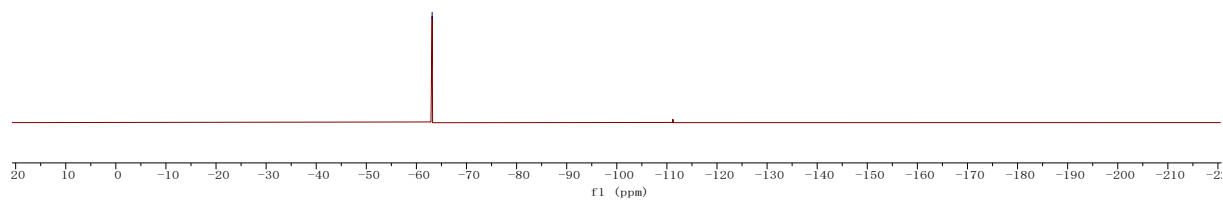

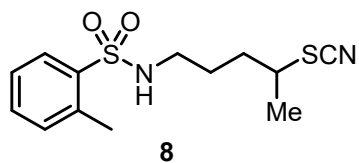

<sup>1</sup>H NMR  
 500 MHz  
 CDCl<sub>3</sub>

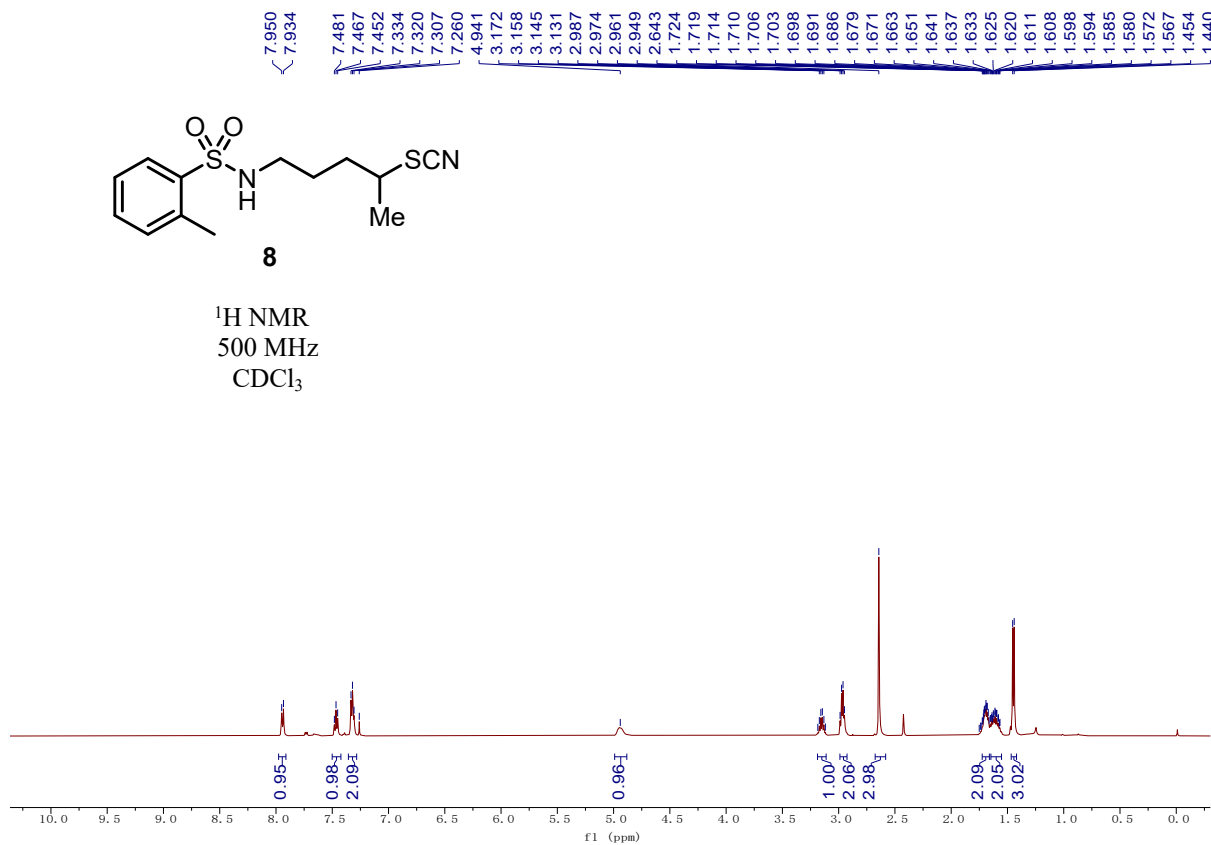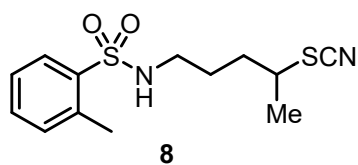

<sup>13</sup>C NMR  
 125 MHz  
 CDCl<sub>3</sub>

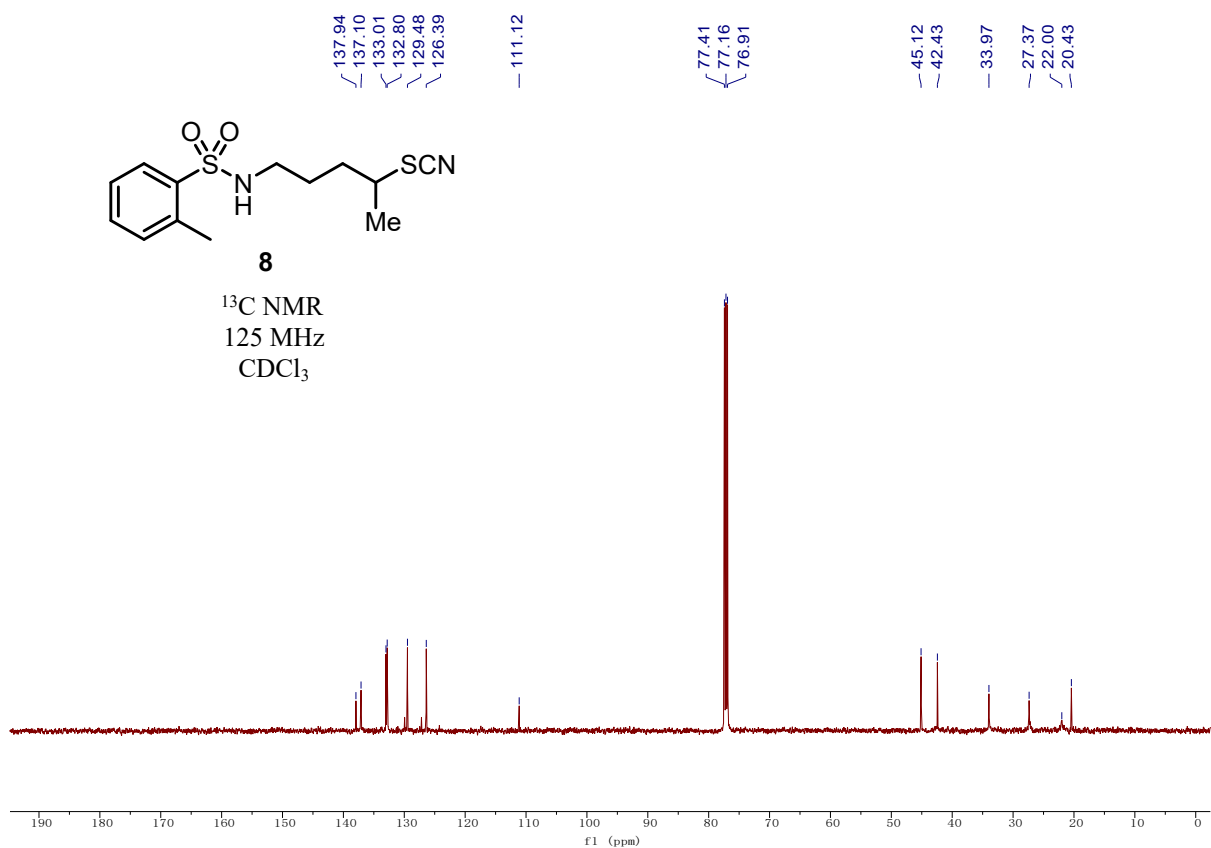

7.624  
7.621  
7.616  
7.613  
7.606  
7.603  
7.260  
7.117  
7.108  
7.100  
4.866  
4.853  
4.840  
3.256  
3.242  
3.228  
3.215  
3.201  
3.188  
3.091  
3.077  
3.064  
3.052  
1.804  
1.799  
1.790  
1.785  
1.778  
1.771  
1.763  
1.759  
1.753  
1.744  
1.741  
1.733  
1.721  
1.703  
1.697  
1.692  
1.689  
1.685  
1.678  
1.675  
1.665  
1.660  
1.652  
1.646  
1.639  
1.633  
1.632  
1.619  
1.505  
1.491

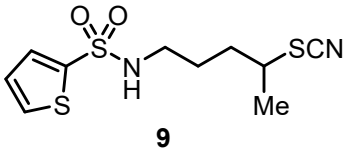

<sup>1</sup>H NMR  
500 MHz  
CDCl<sub>3</sub>

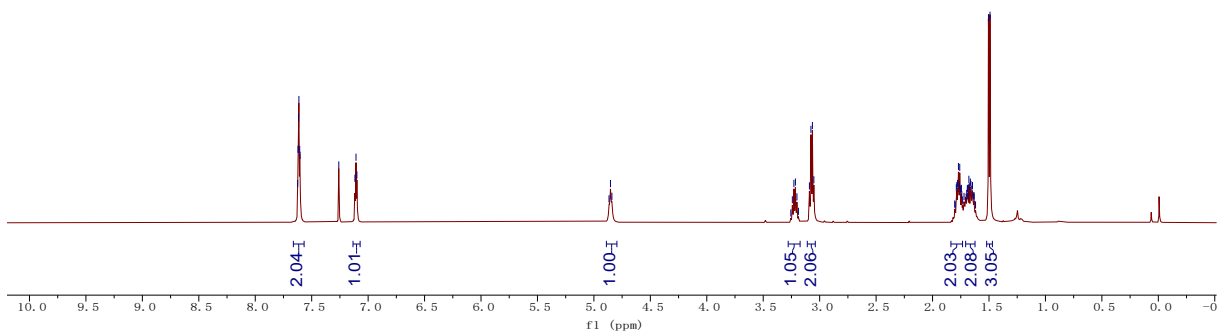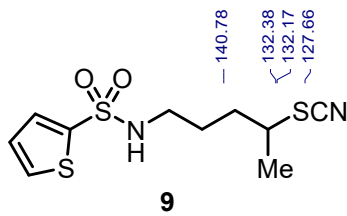

<sup>13</sup>C NMR  
125 MHz  
CDCl<sub>3</sub>

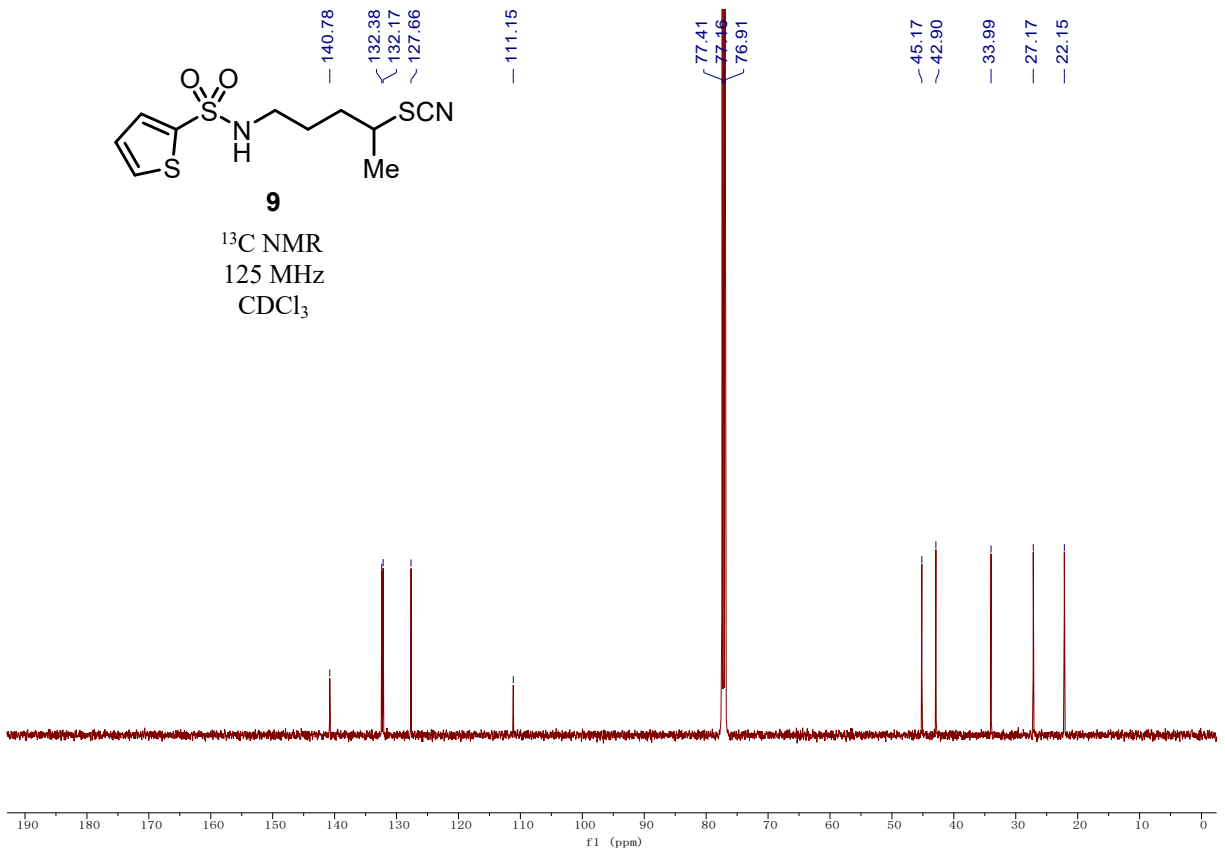

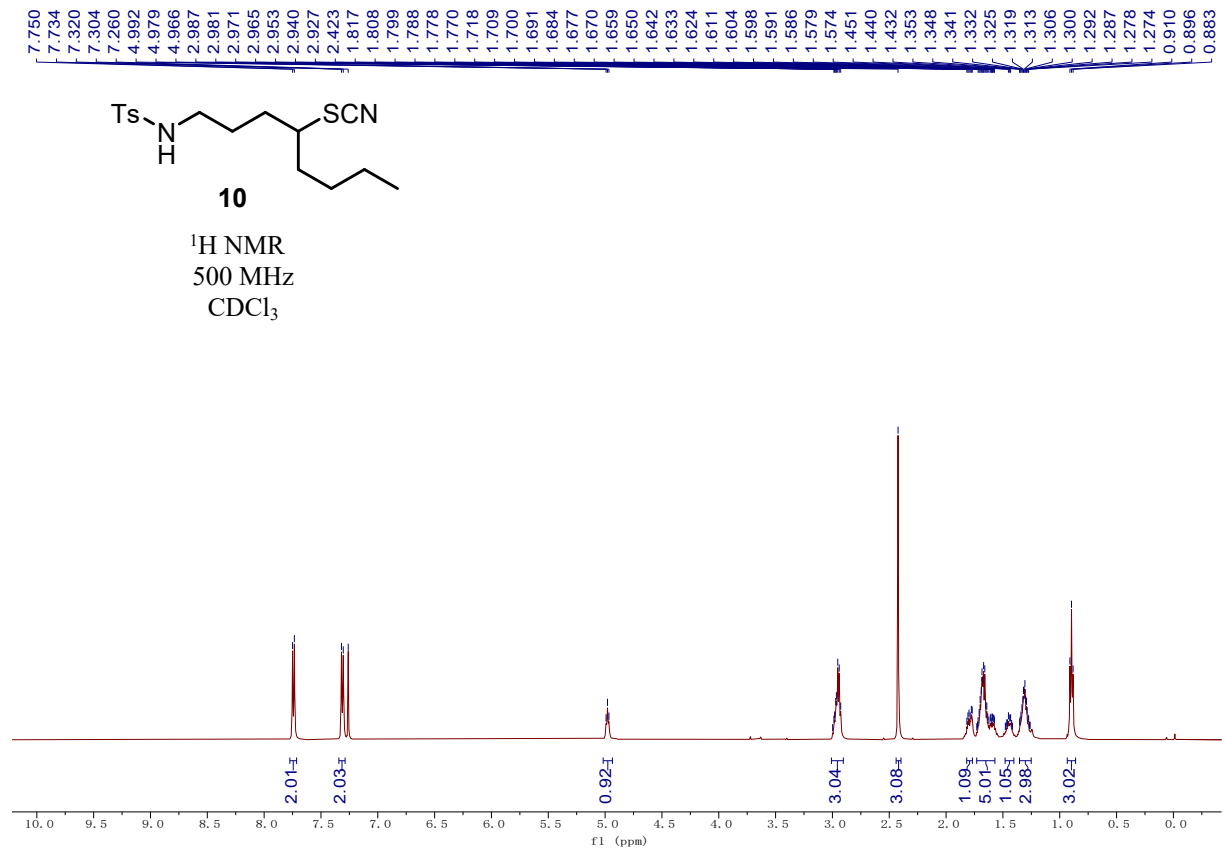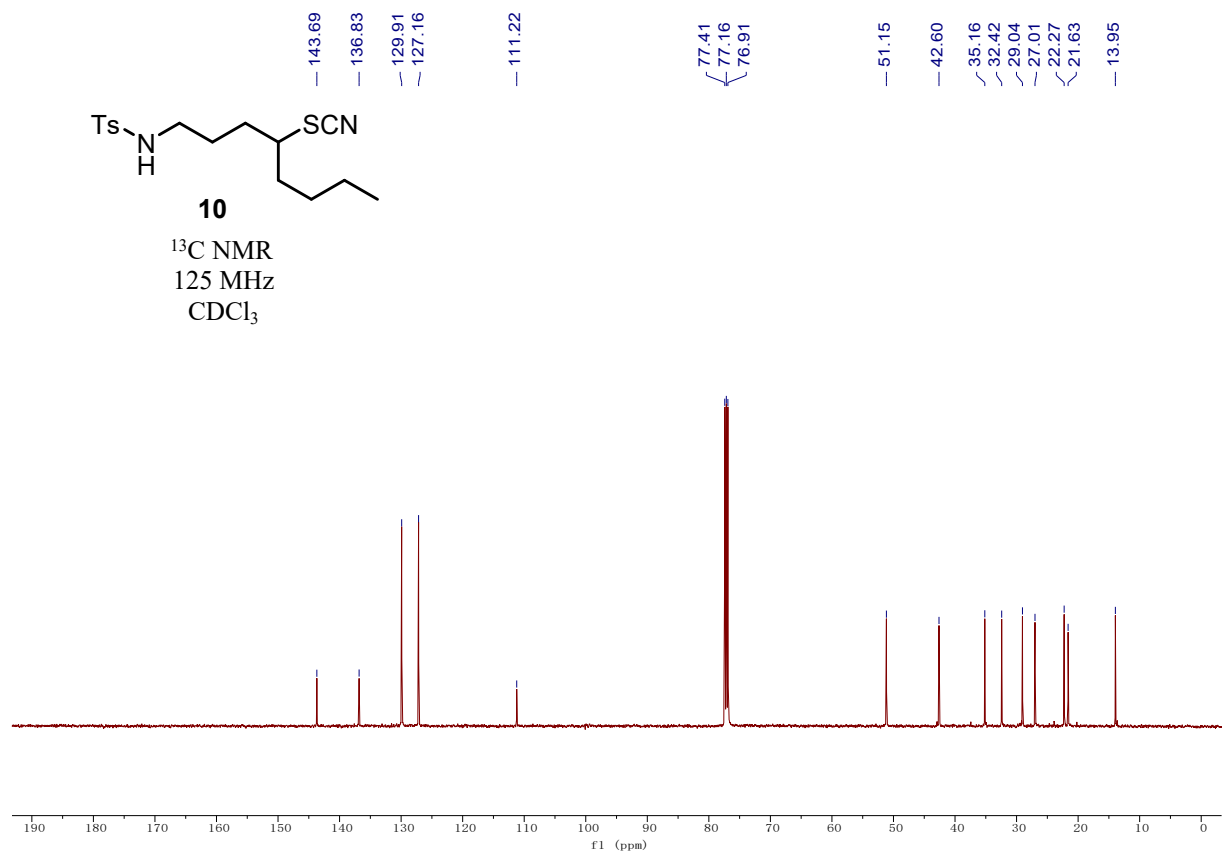

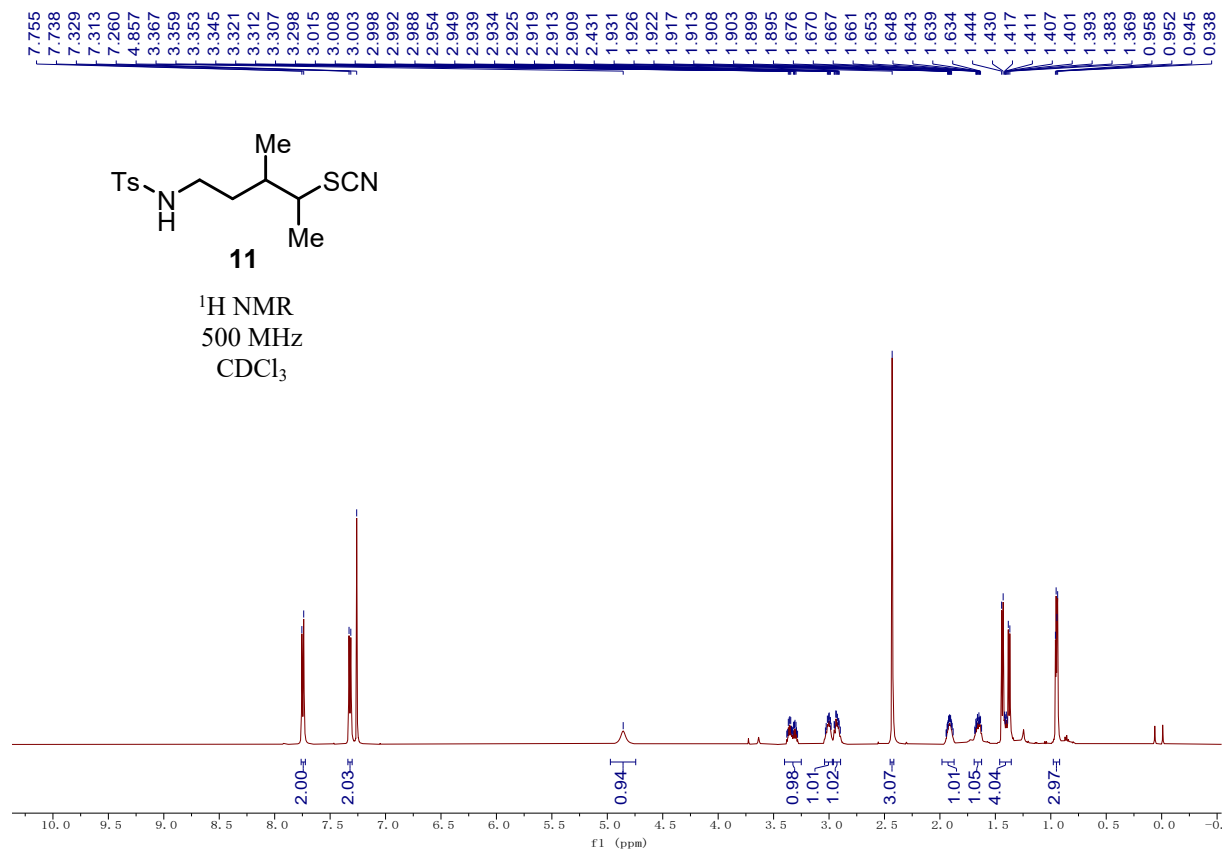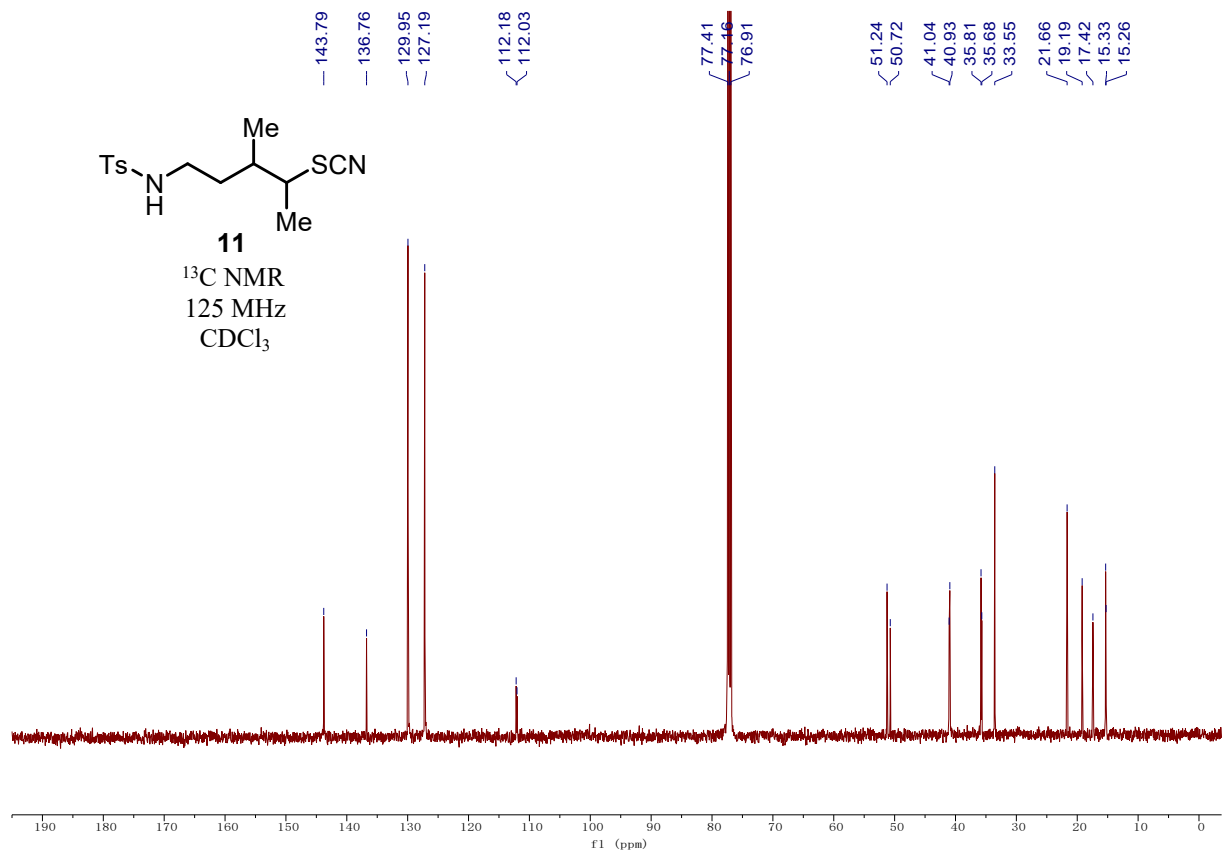

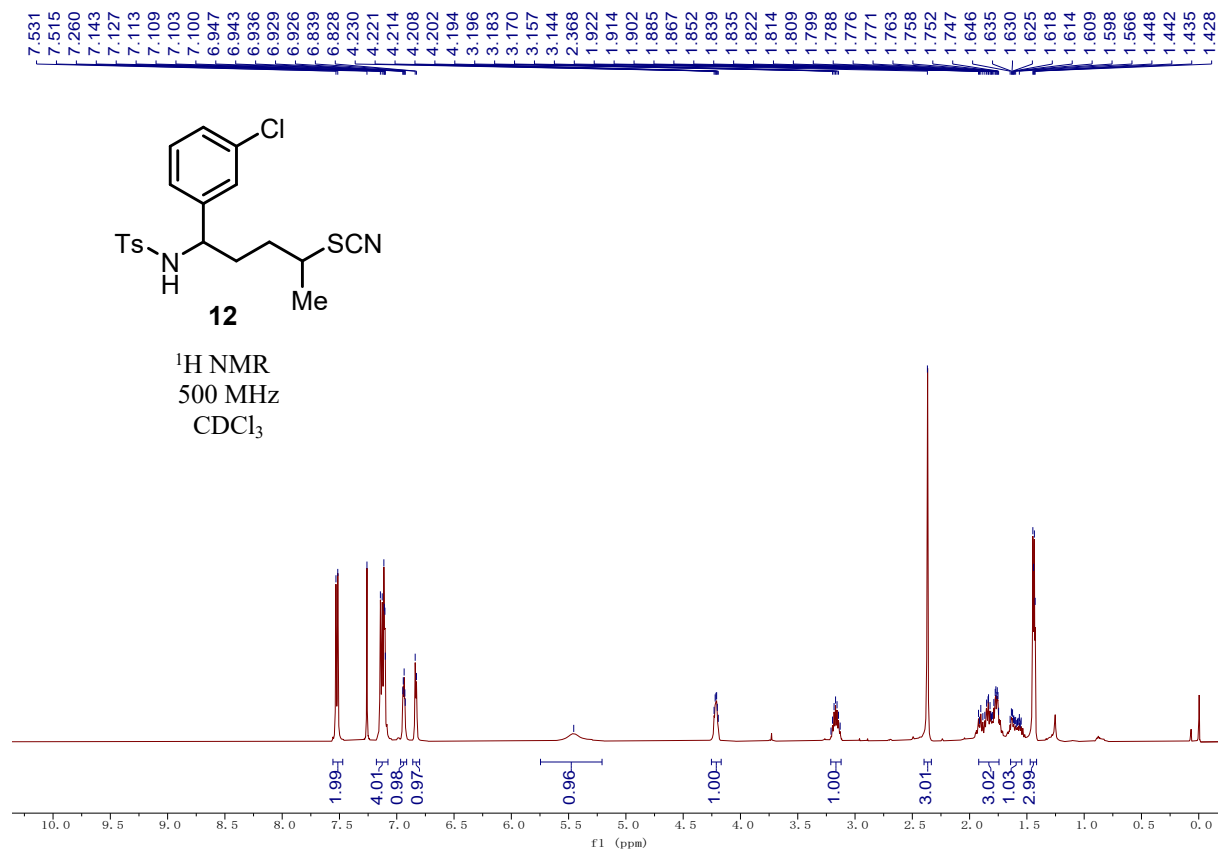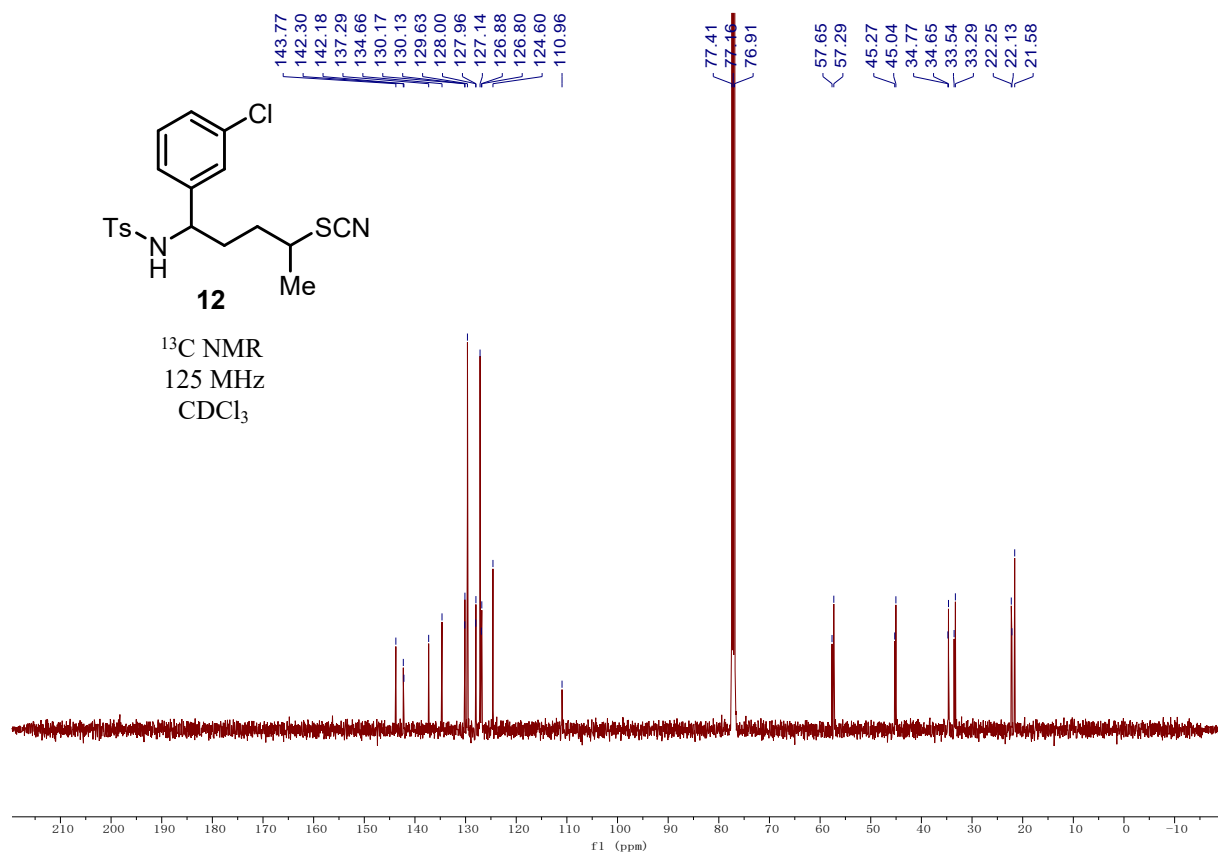



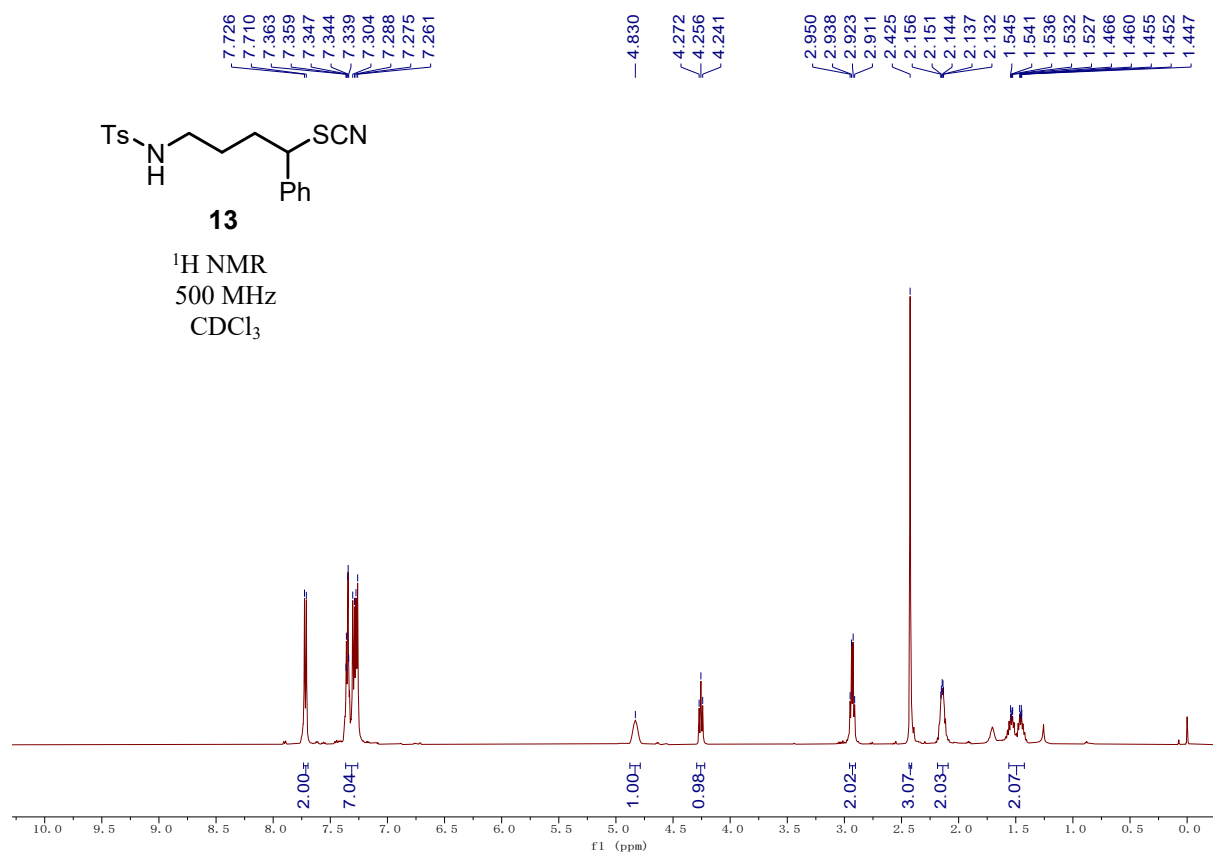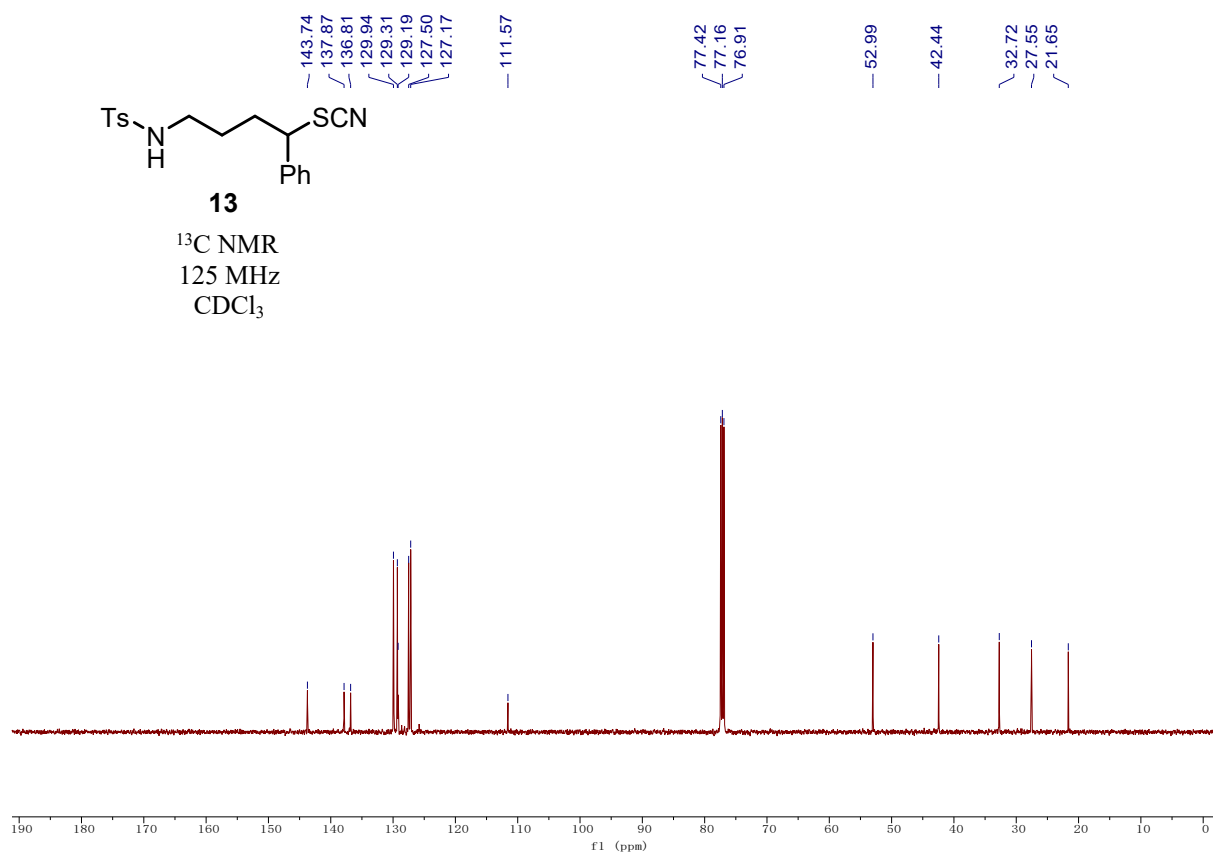

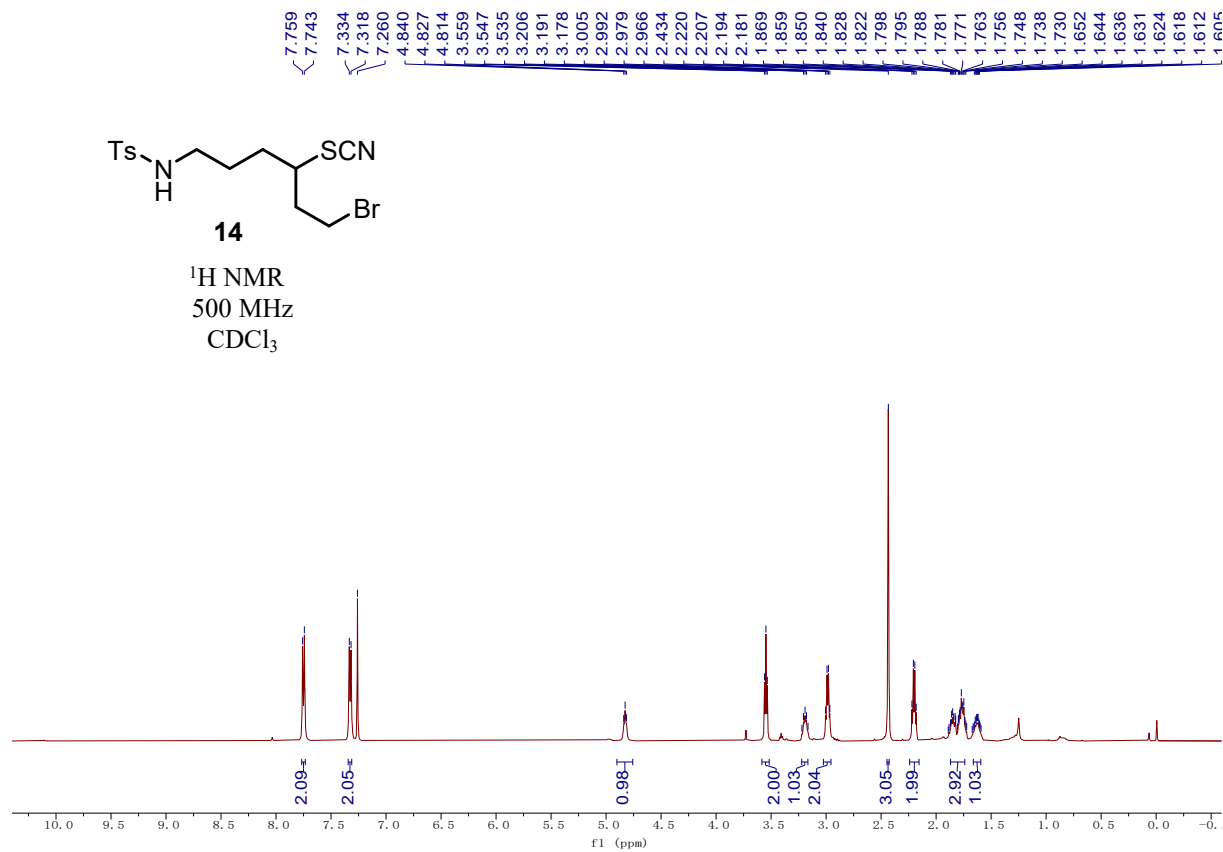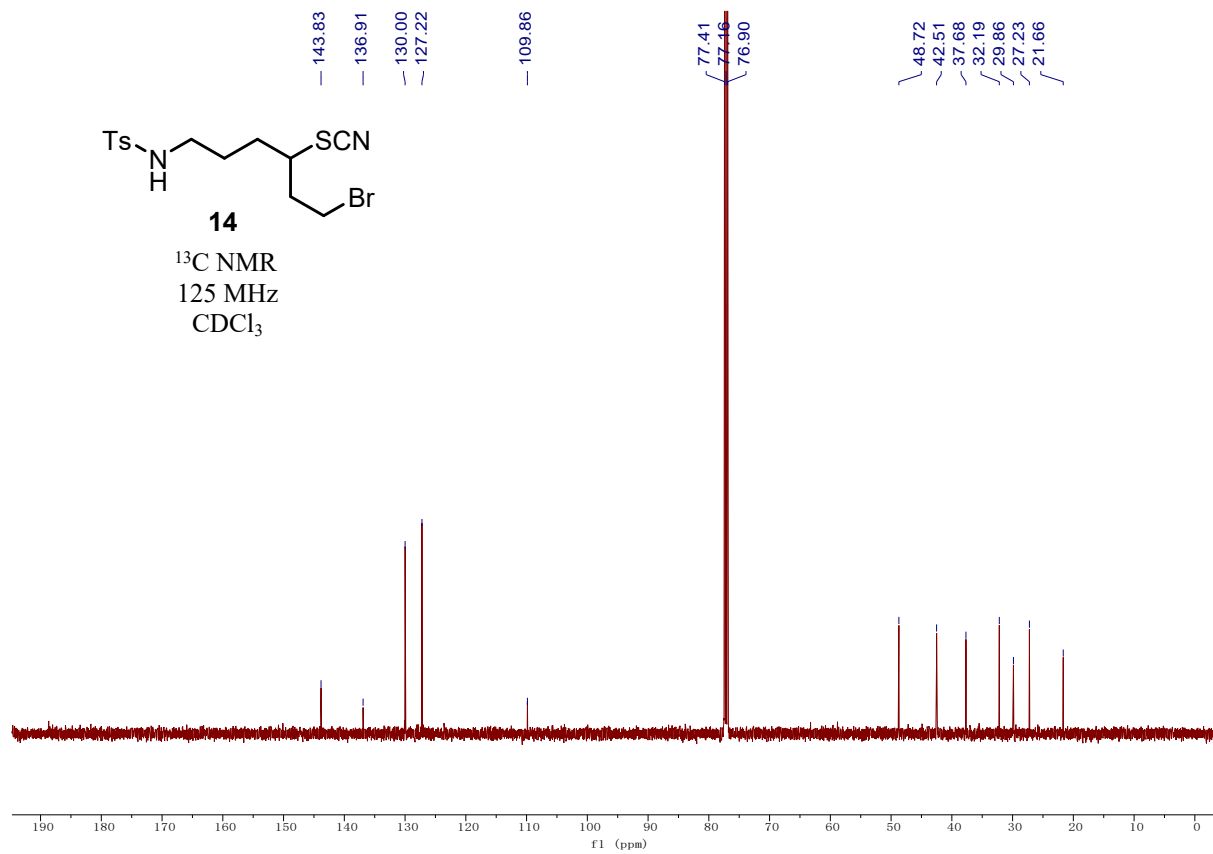

7.741  
7.724  
7.312  
7.296  
7.260  
5.265  
4.819  
3.321  
3.309  
3.294  
3.278  
3.264  
3.250  
3.236  
3.222  
3.209  
3.106  
3.089  
3.079  
3.071  
3.061  
3.052  
3.044  
3.034  
2.971  
2.958  
2.947  
2.936  
2.923  
2.419  
1.974  
1.960  
1.945  
1.932  
1.914  
1.906  
1.896  
1.883  
1.879  
1.871  
1.867  
1.854  
1.842  
1.838  
1.826  
1.765  
1.758  
1.752  
1.744  
1.740  
1.732  
1.726  
1.718  
1.713  
1.703  
1.691  
1.678  
1.668  
1.418

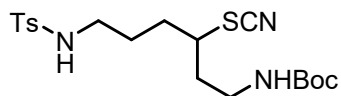

<sup>1</sup>H NMR  
500 MHz  
CDCl<sub>3</sub>

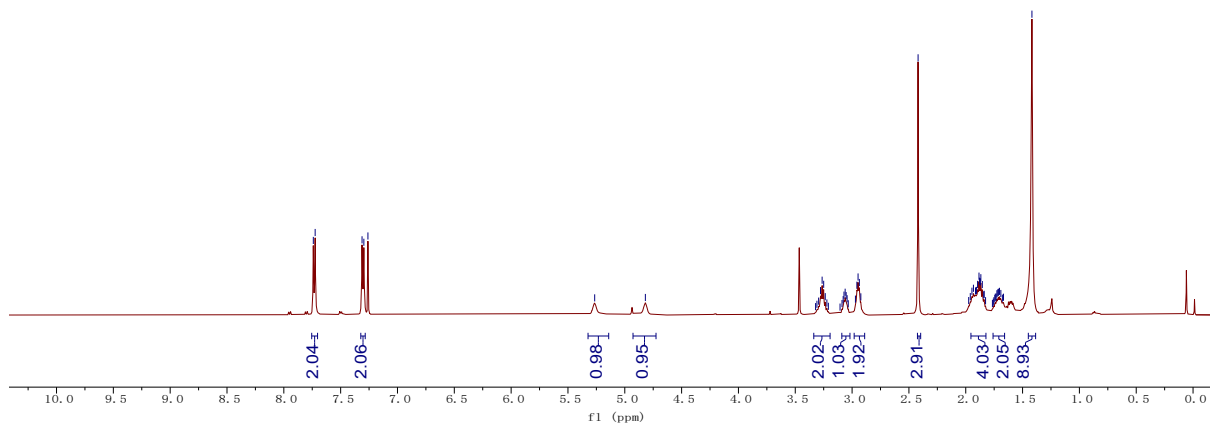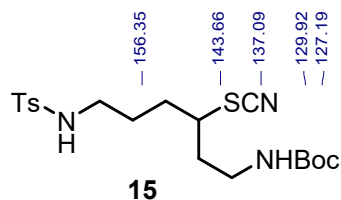

<sup>13</sup>C NMR  
125 MHz  
CDCl<sub>3</sub>

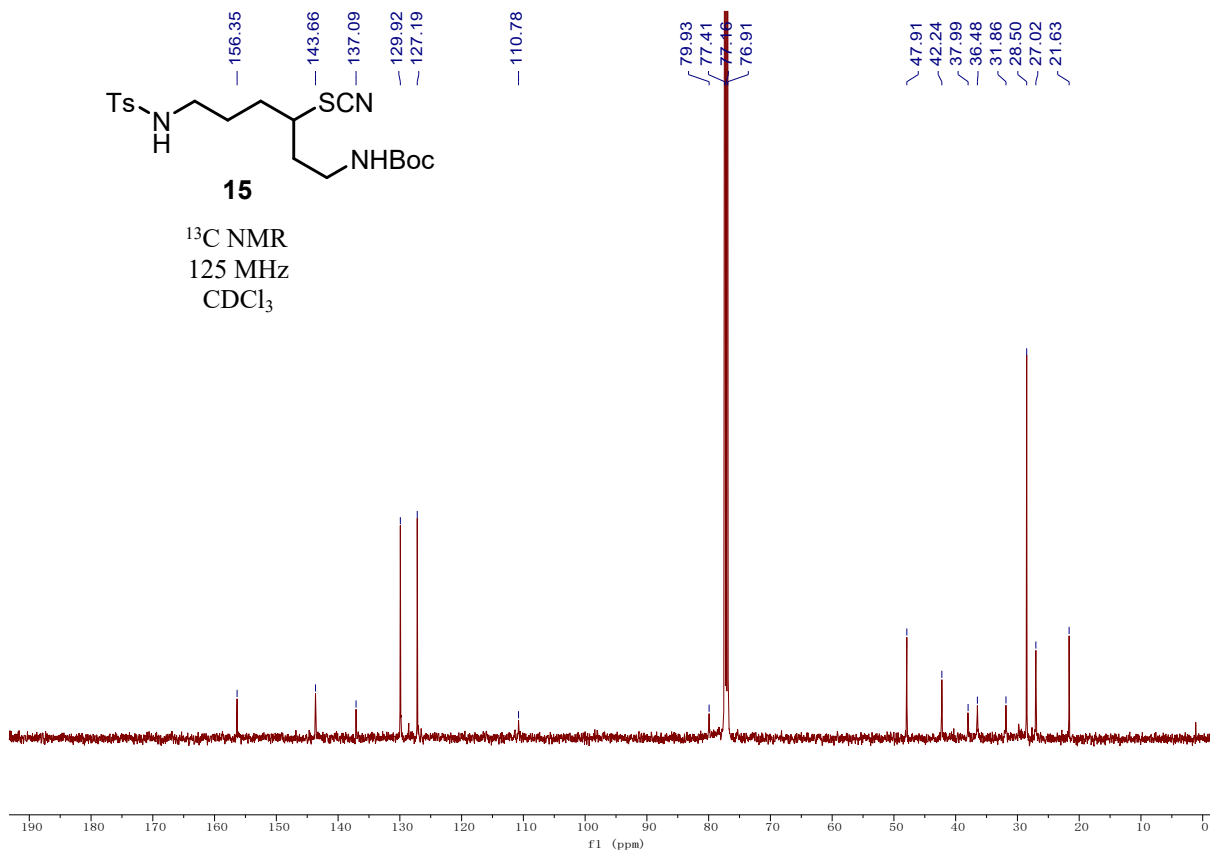

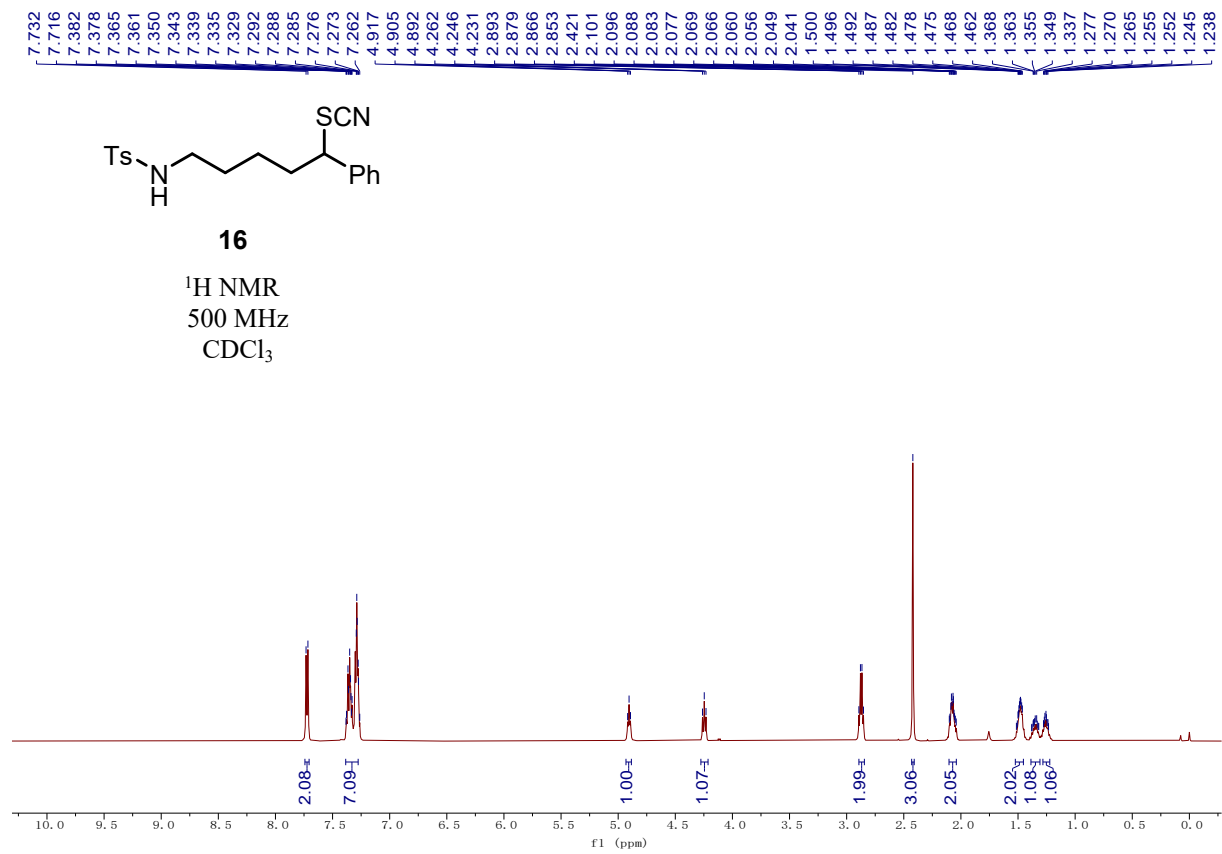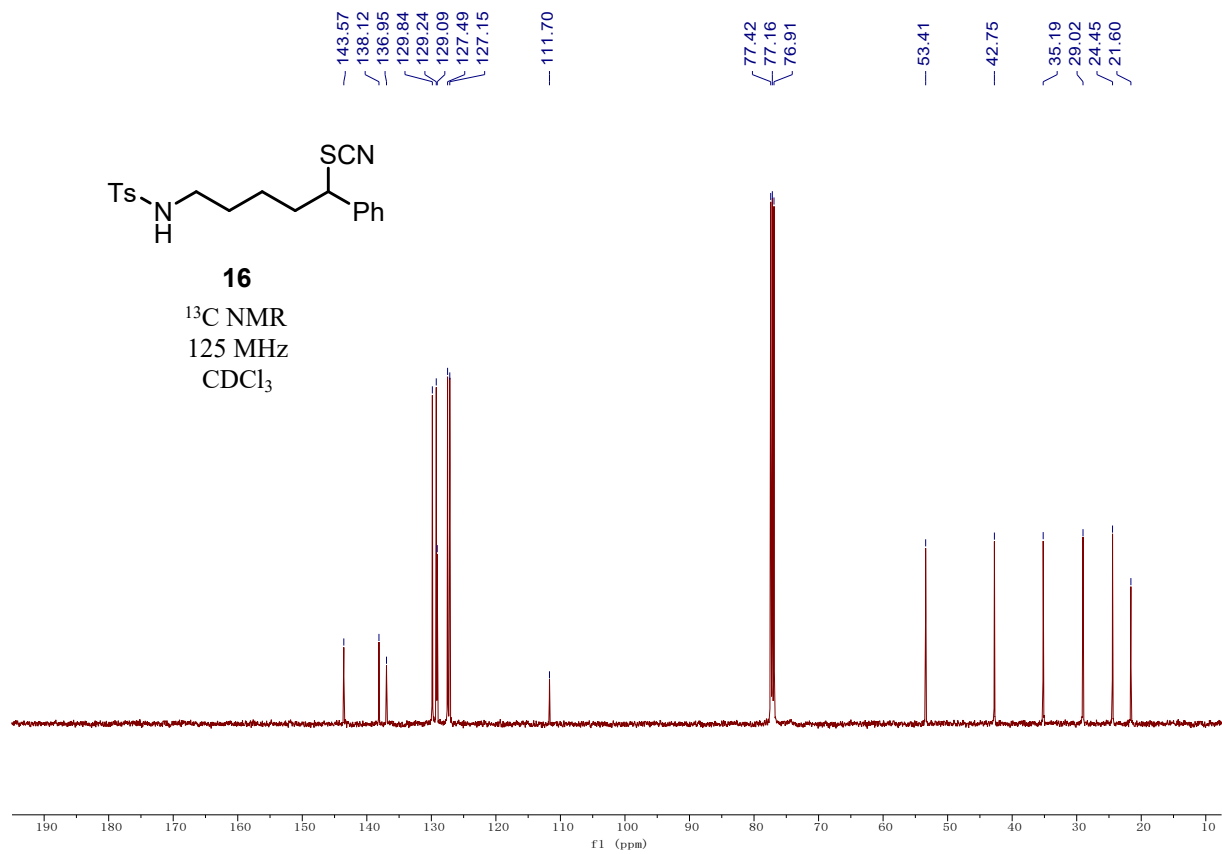

7.751  
7.734  
7.317  
7.301  
7.260  
5.010  
4.998  
4.985  
2.988  
2.979  
2.969  
2.965  
2.960  
2.956  
2.952  
2.942  
2.929  
2.419  
2.033  
2.011  
2.001  
1.997  
1.988  
1.984  
1.974  
1.971  
1.833  
1.830  
1.823  
1.814  
1.804  
1.758  
1.751  
1.745  
1.739  
1.733  
1.725  
1.720  
1.670  
1.658  
1.652  
1.644  
1.632  
1.624  
1.618  
1.613  
1.611  
1.605  
1.600  
1.586  
1.575  
1.486  
1.471  
1.442  
1.398  
1.384  
1.014  
1.000  
0.975  
0.961

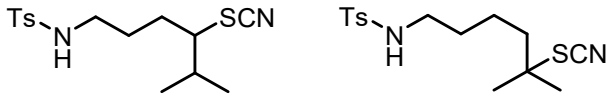

17

<sup>1</sup>H NMR  
500 MHz  
CDCl<sub>3</sub>

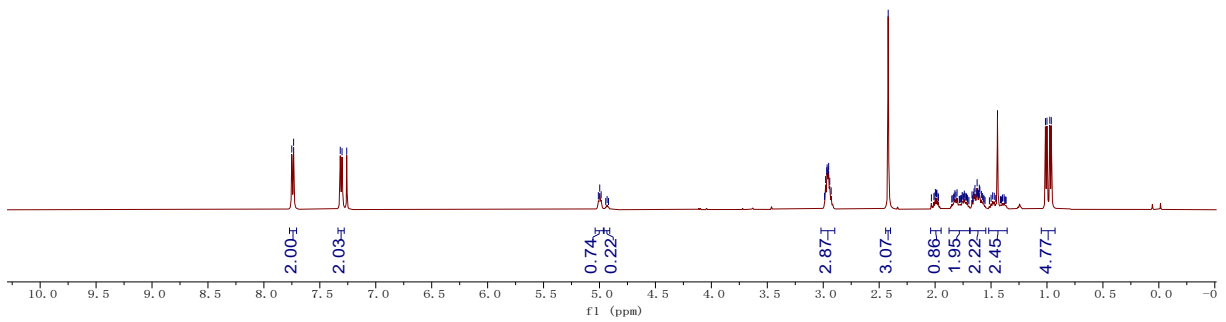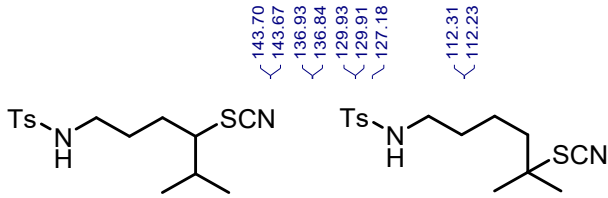

17

<sup>13</sup>C NMR  
125 MHz  
CDCl<sub>3</sub>

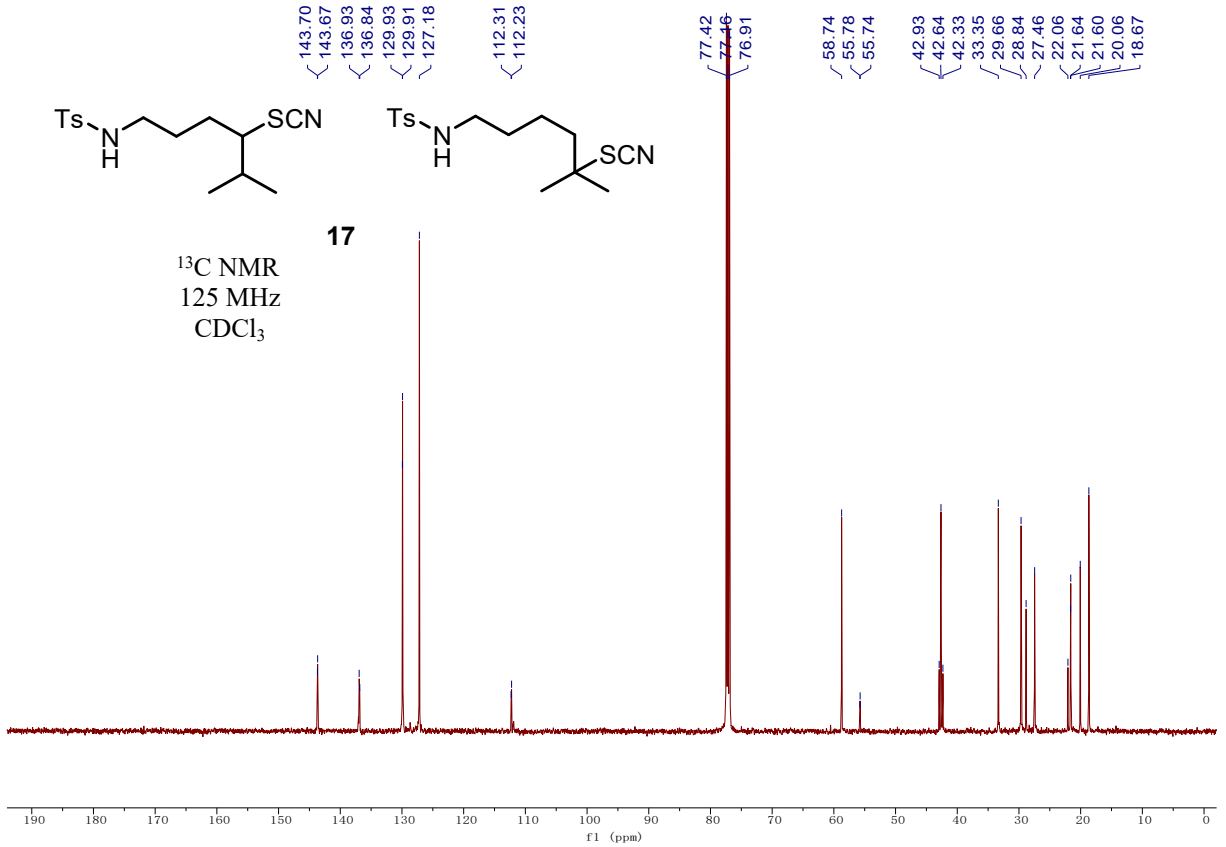

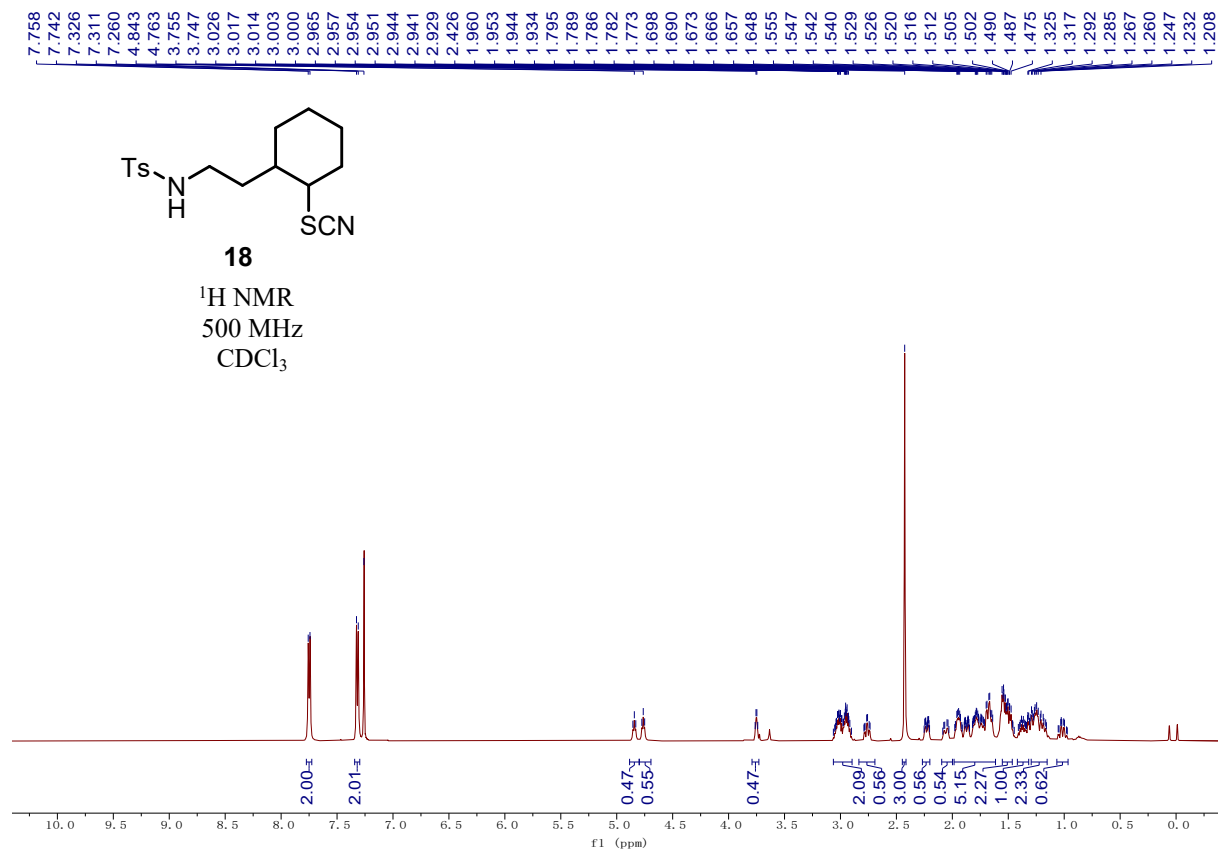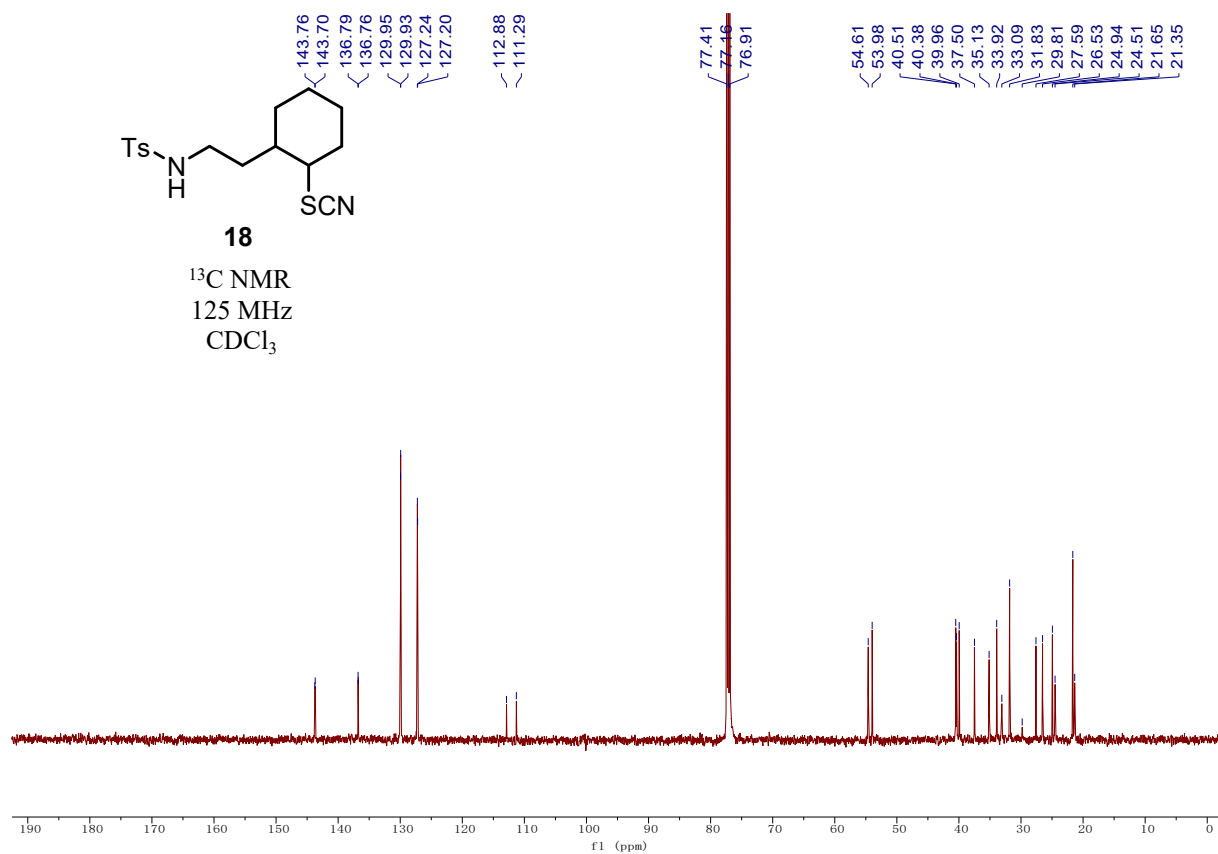

7.762  
7.746  
7.730  
7.314  
7.260  
4.697  
4.685  
3.636  
3.007  
2.998  
2.986  
2.966  
2.955  
2.945  
2.941  
2.429  
2.284  
2.278  
2.271  
2.265  
1.971  
1.965  
1.958  
1.952  
1.936  
1.929  
1.924  
1.919  
1.913  
1.906  
1.899  
1.893  
1.887  
1.881  
1.727  
1.700  
1.628  
1.623  
1.604  
1.598  
1.593  
1.587  
1.581  
1.554  
1.485  
1.482  
1.474  
1.465  
1.453  
1.440  
1.429  
1.420  
1.413  
1.408  
1.401  
1.391  
1.386  
1.380  
1.364  
1.358

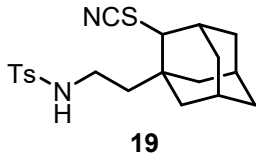

<sup>1</sup>H NMR  
500 MHz  
CDCl<sub>3</sub>

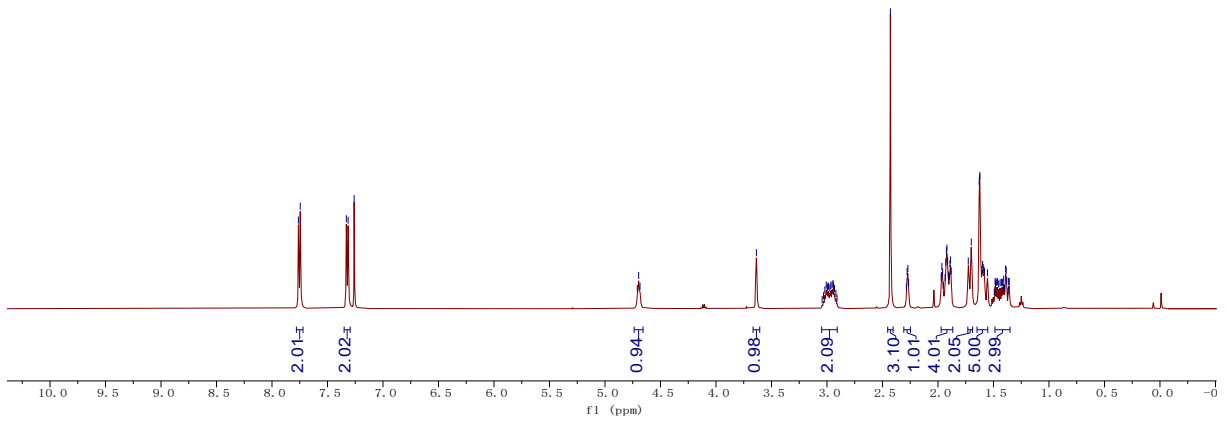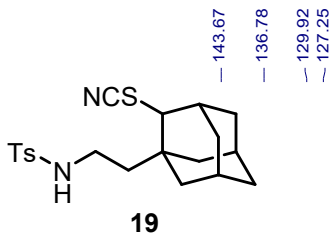

<sup>13</sup>C NMR  
125 MHz  
CDCl<sub>3</sub>

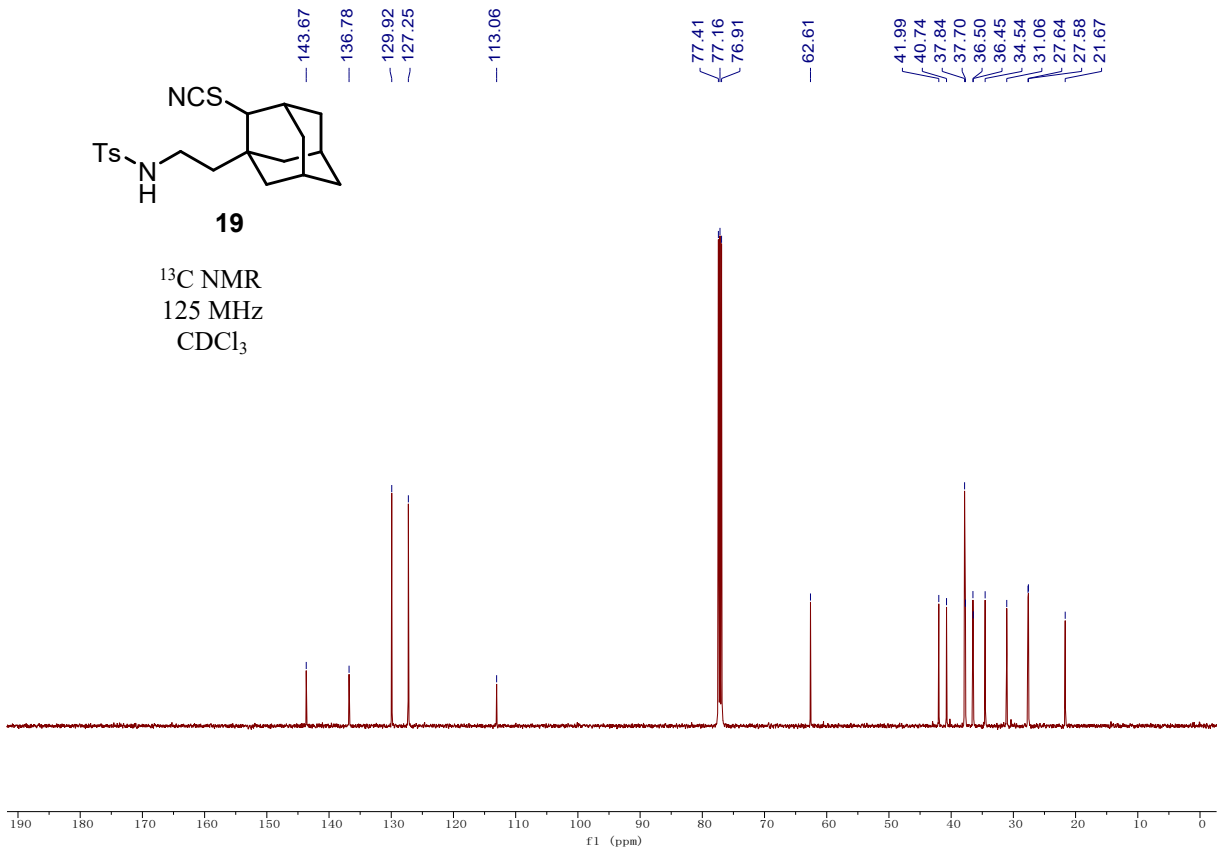

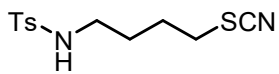

**20**

<sup>1</sup>H NMR  
500 MHz  
CDCl<sub>3</sub>

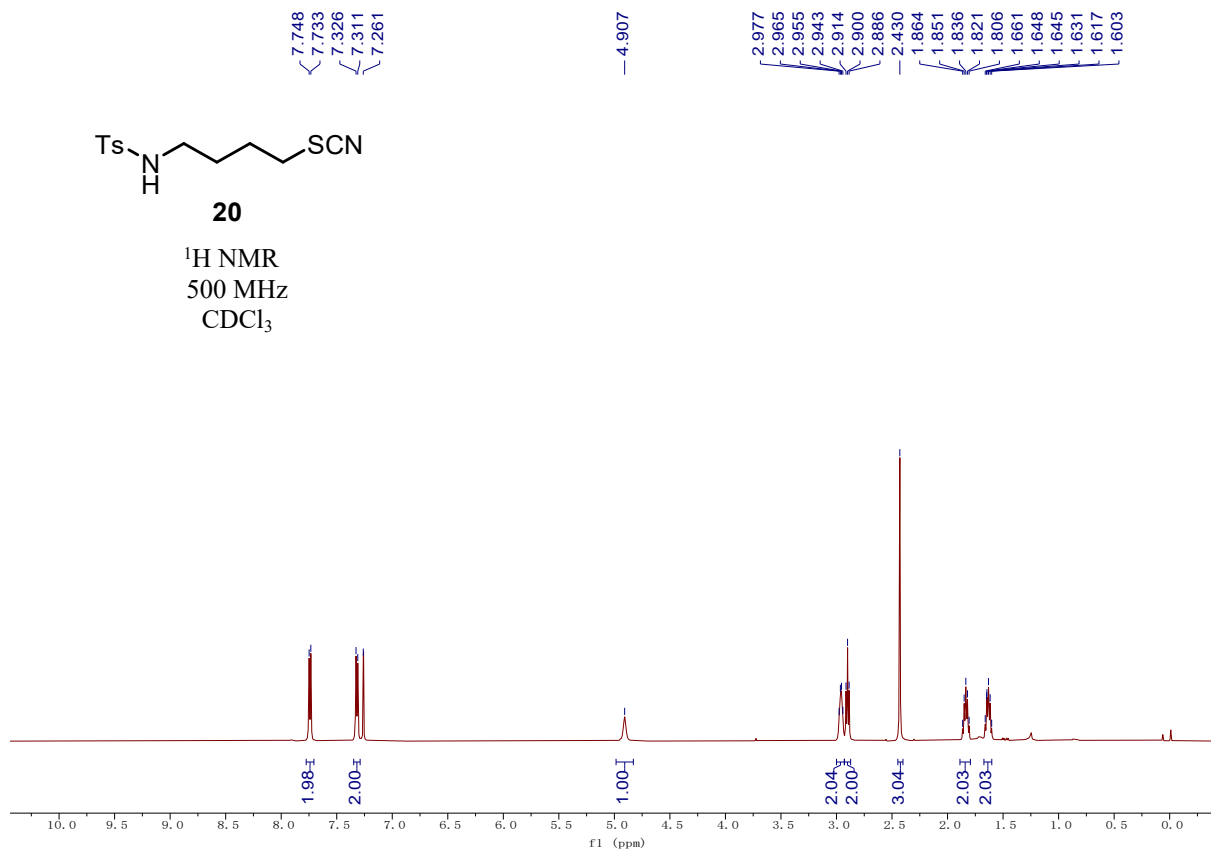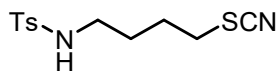

**20**

<sup>13</sup>C NMR  
125 MHz  
CDCl<sub>3</sub>

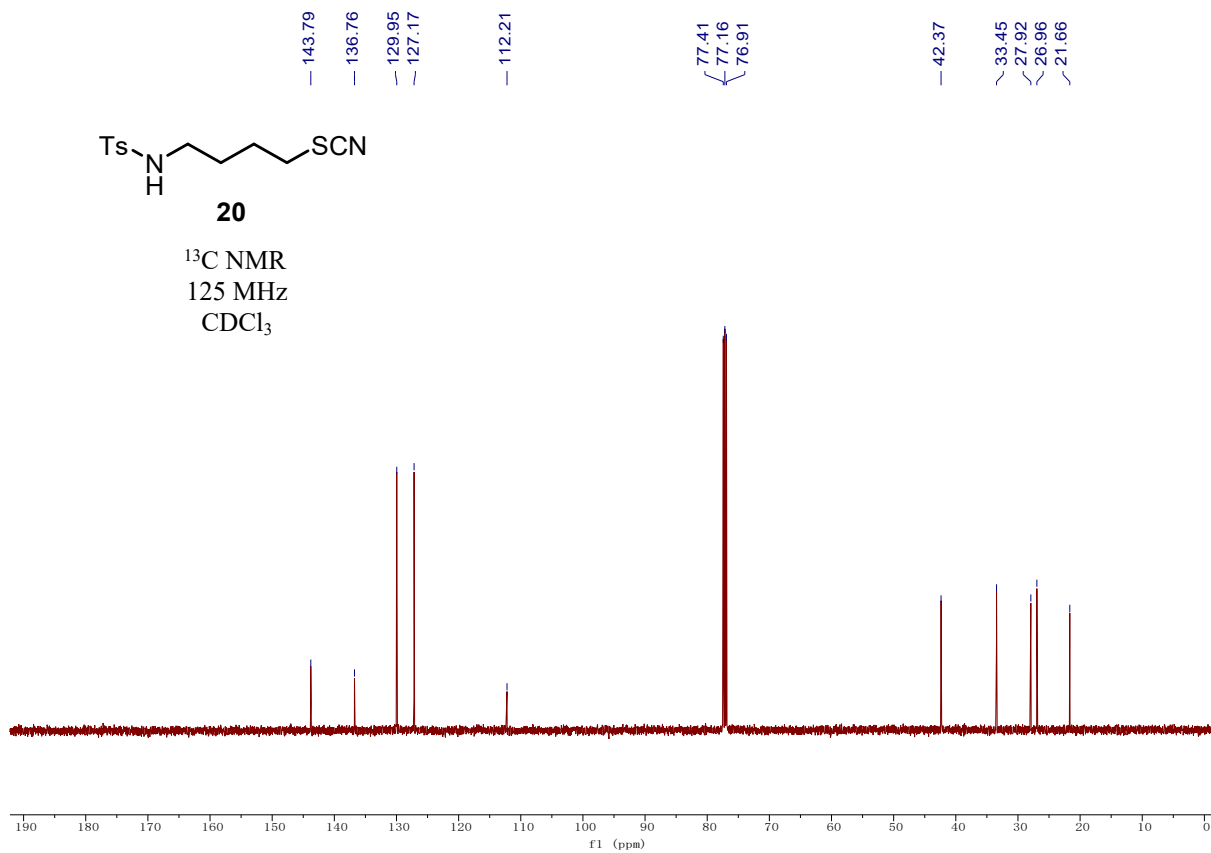



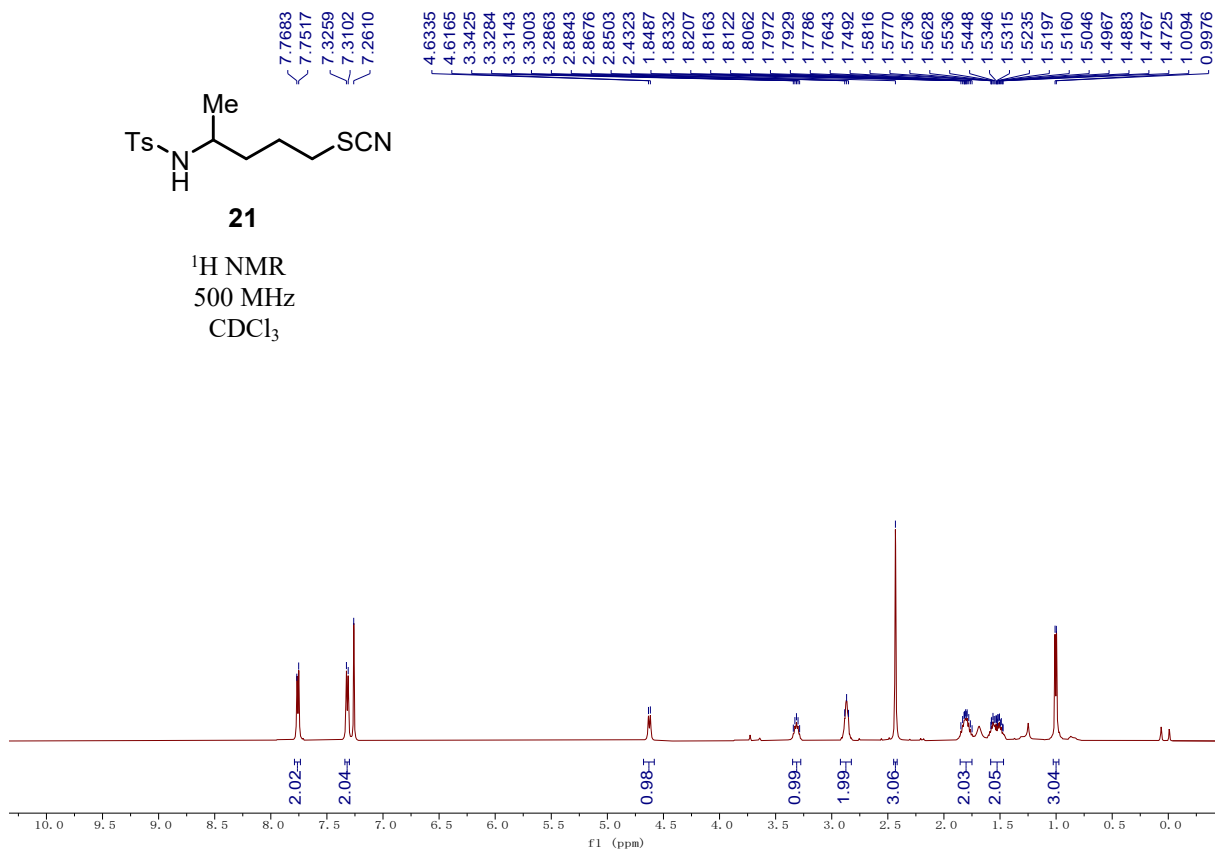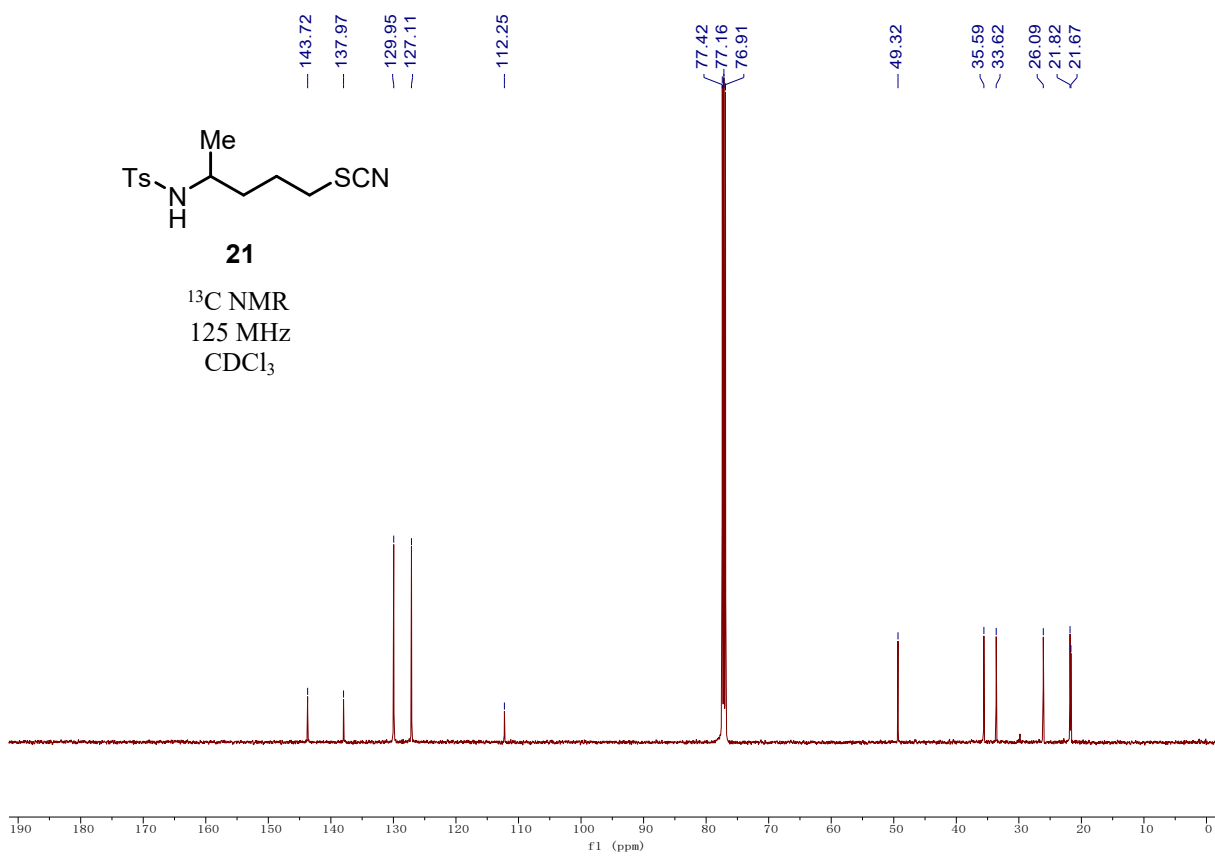

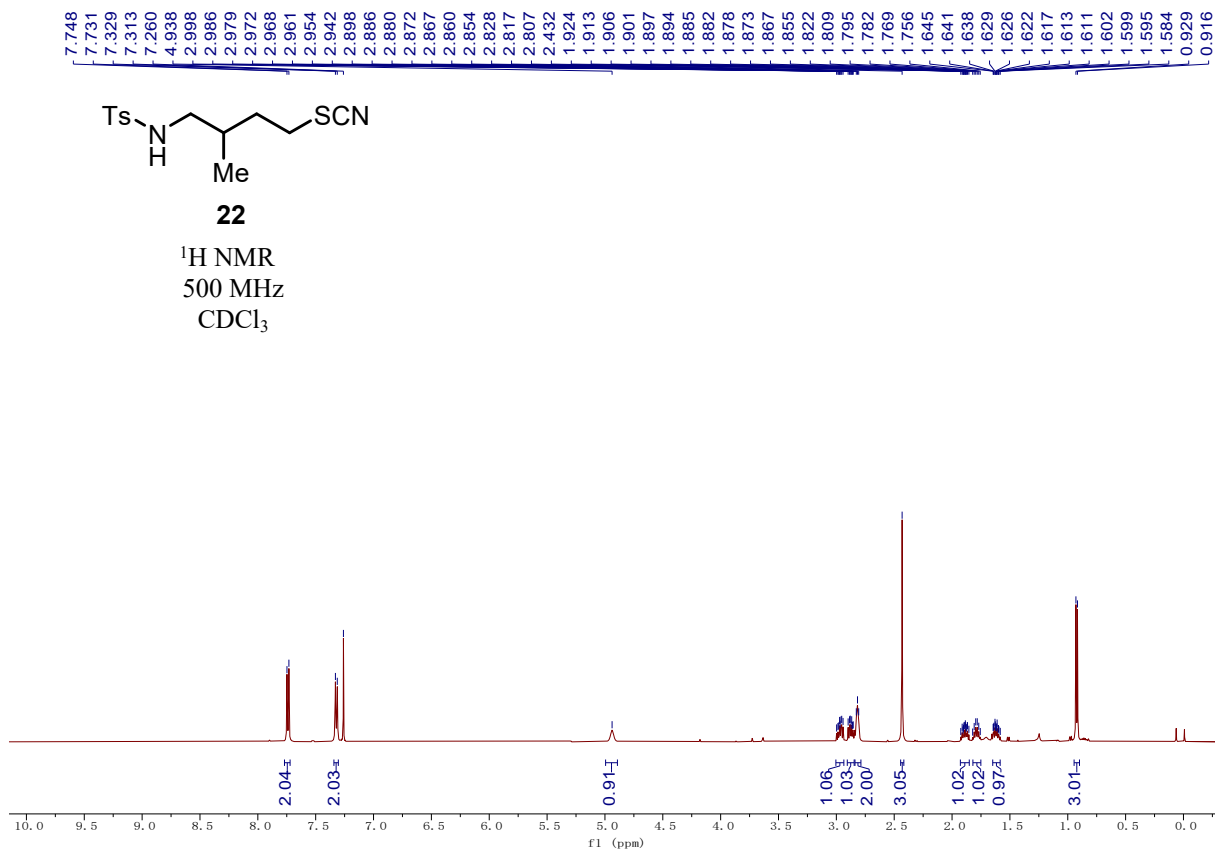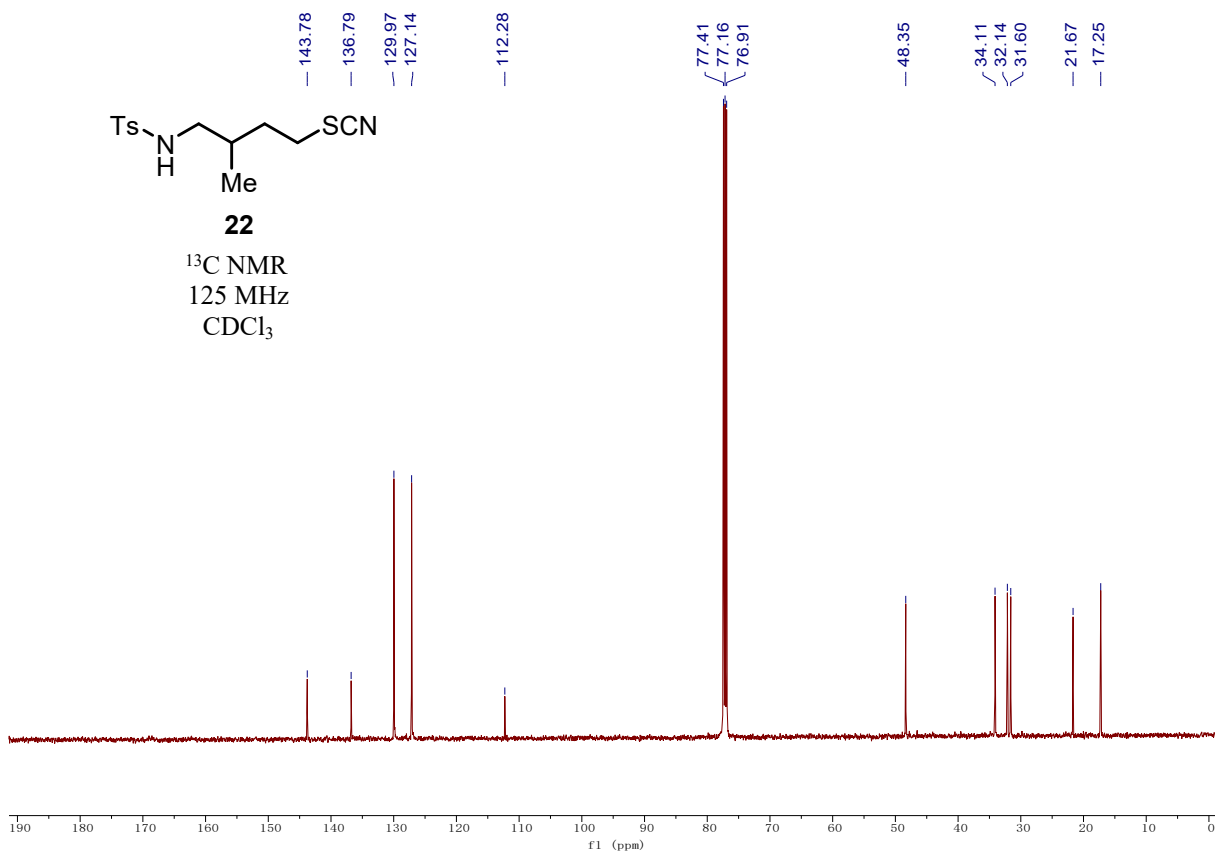

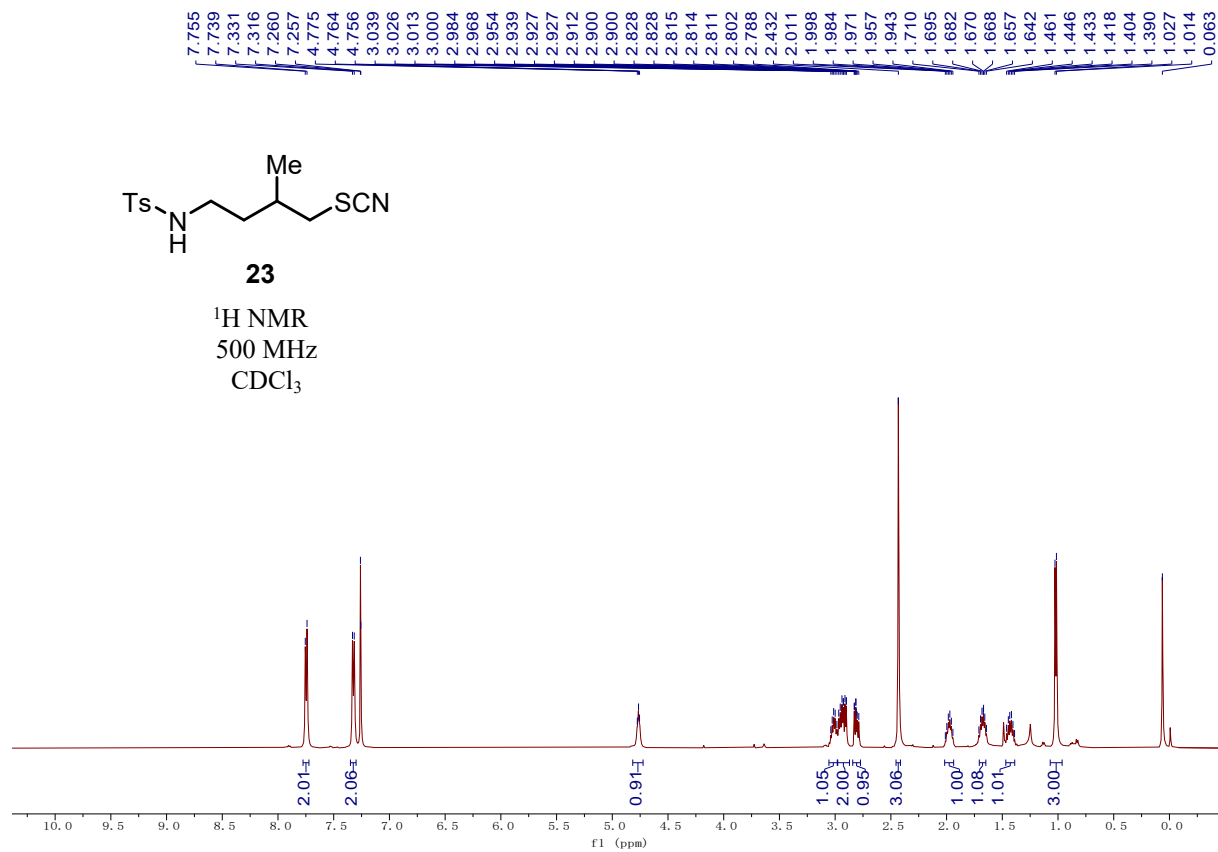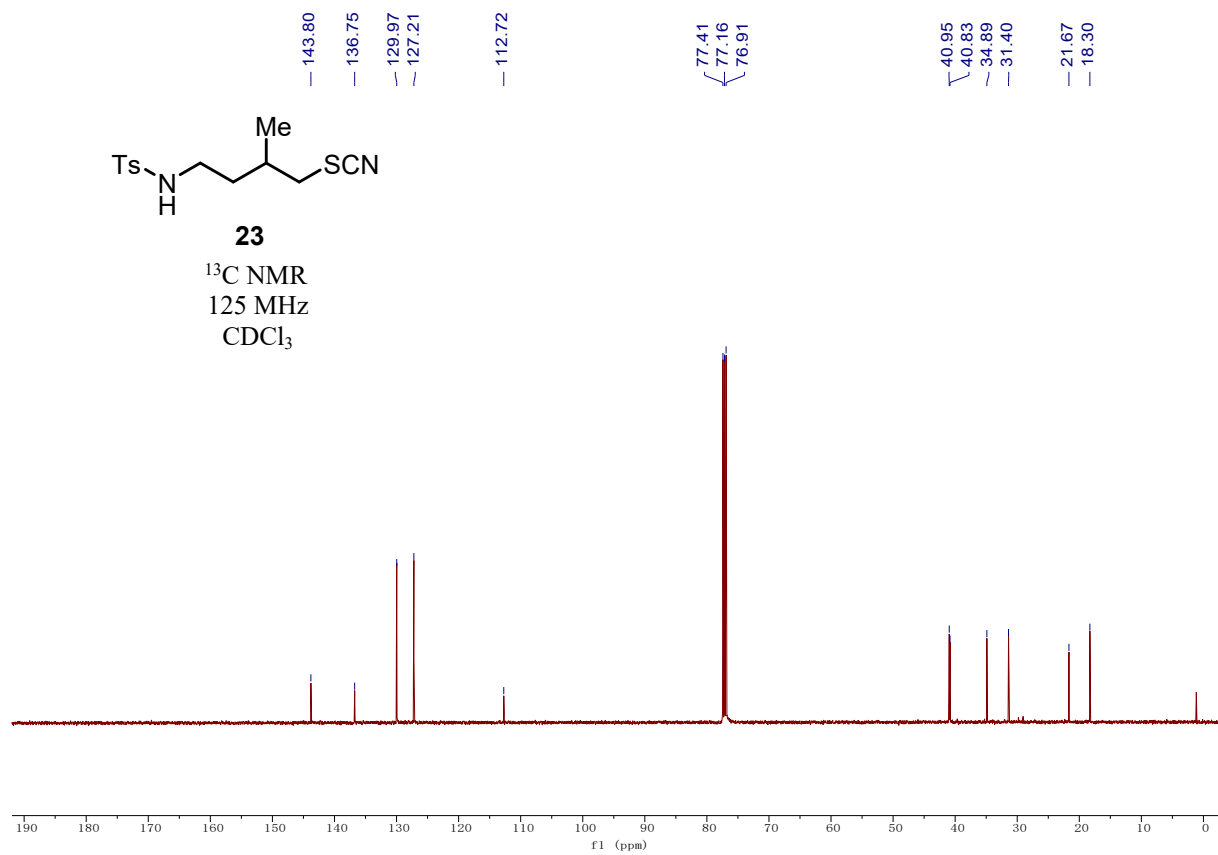

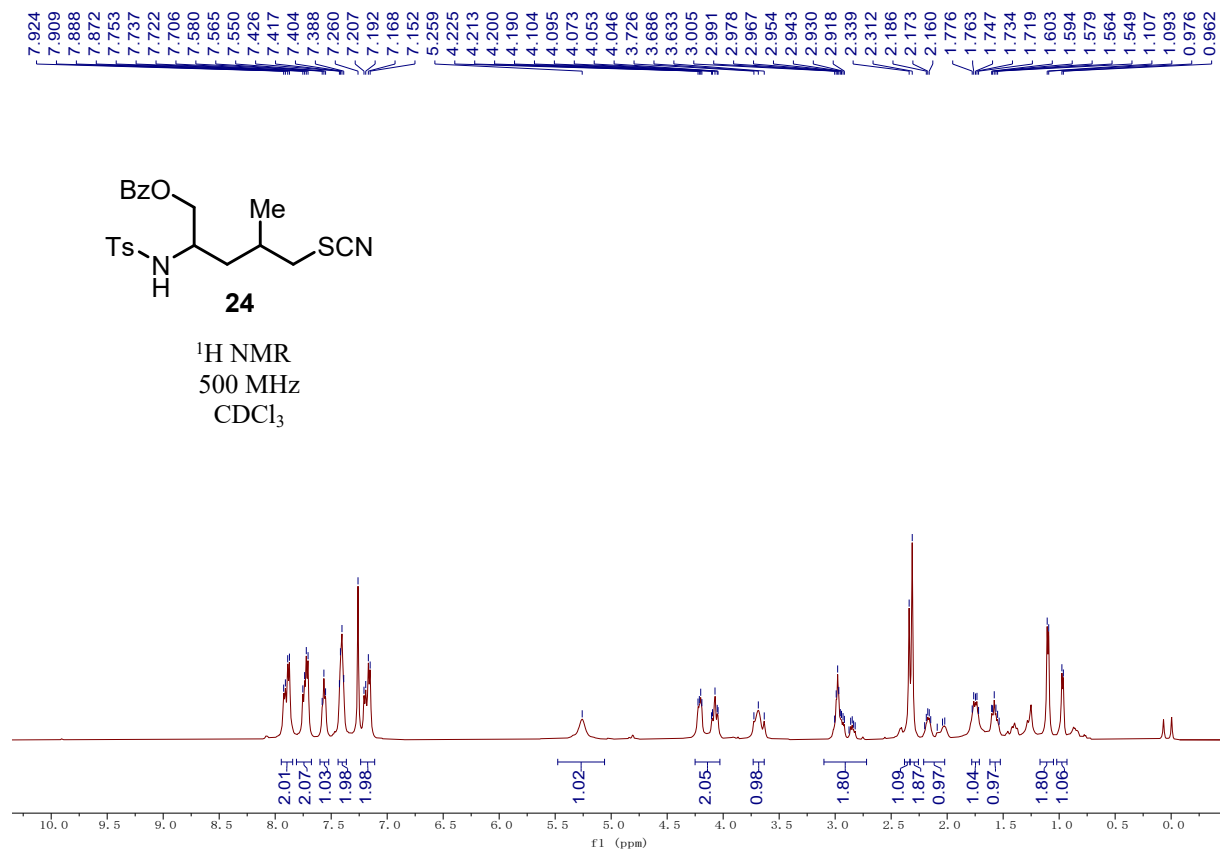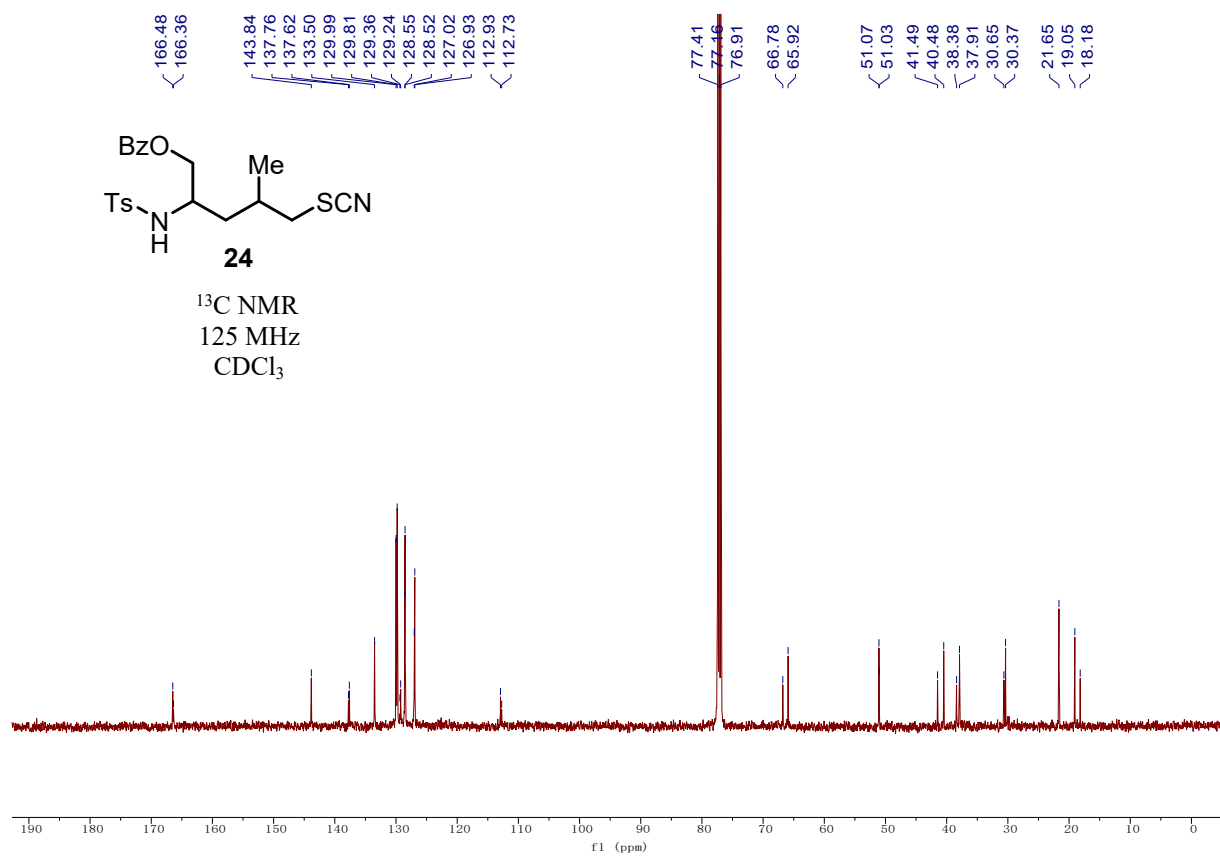

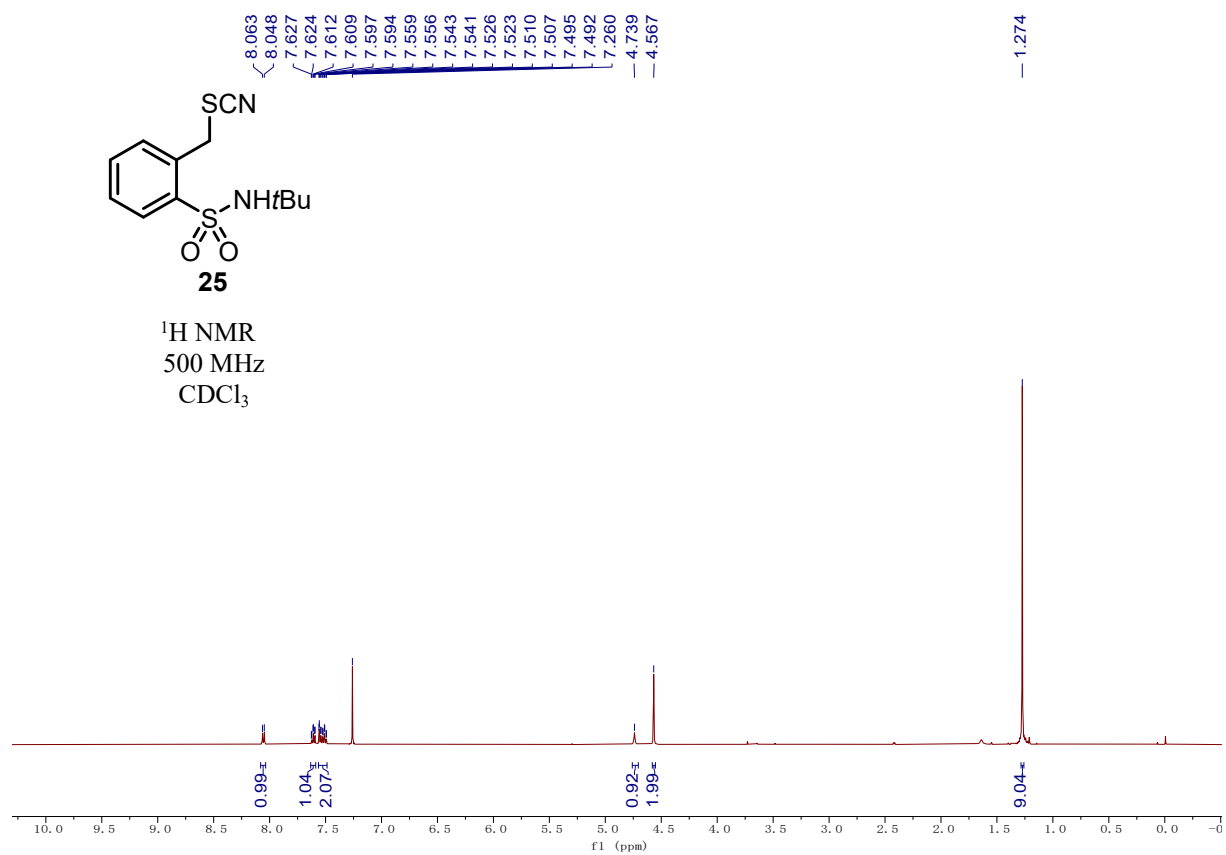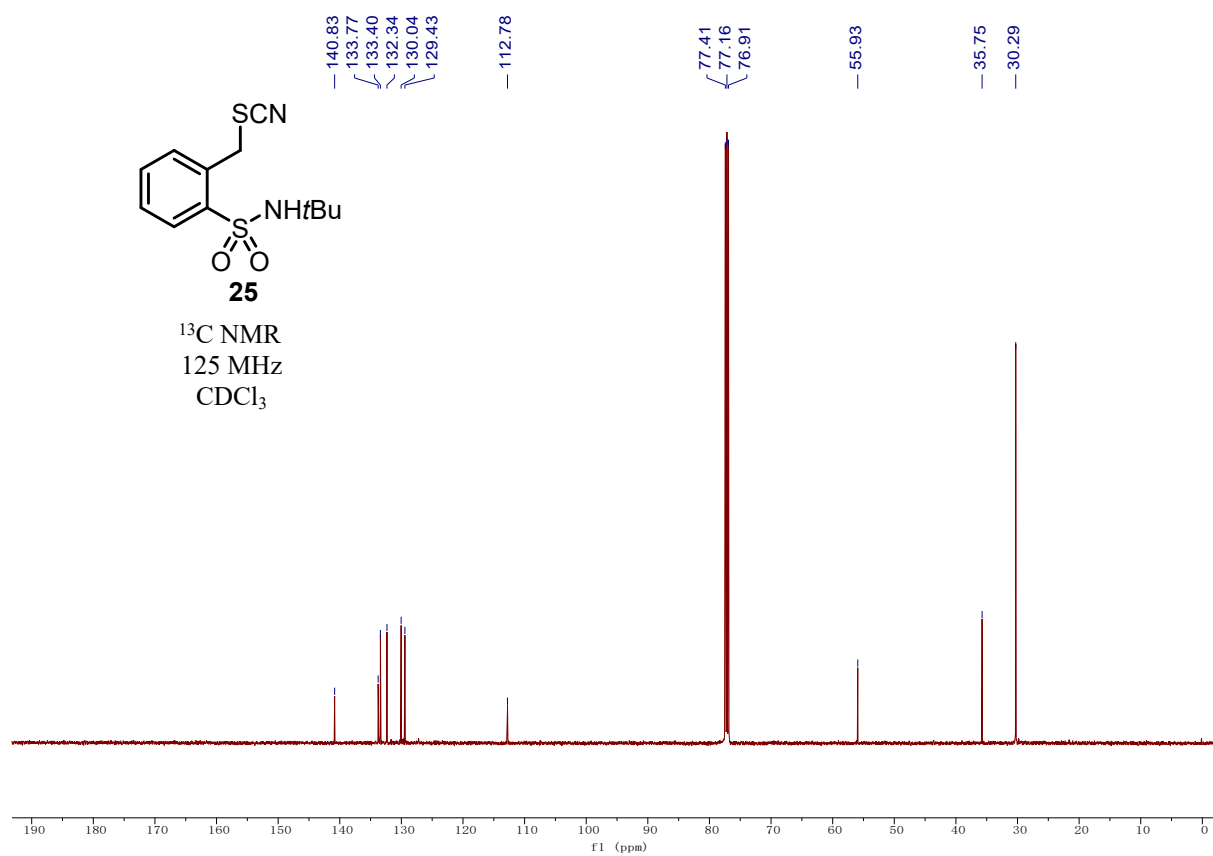

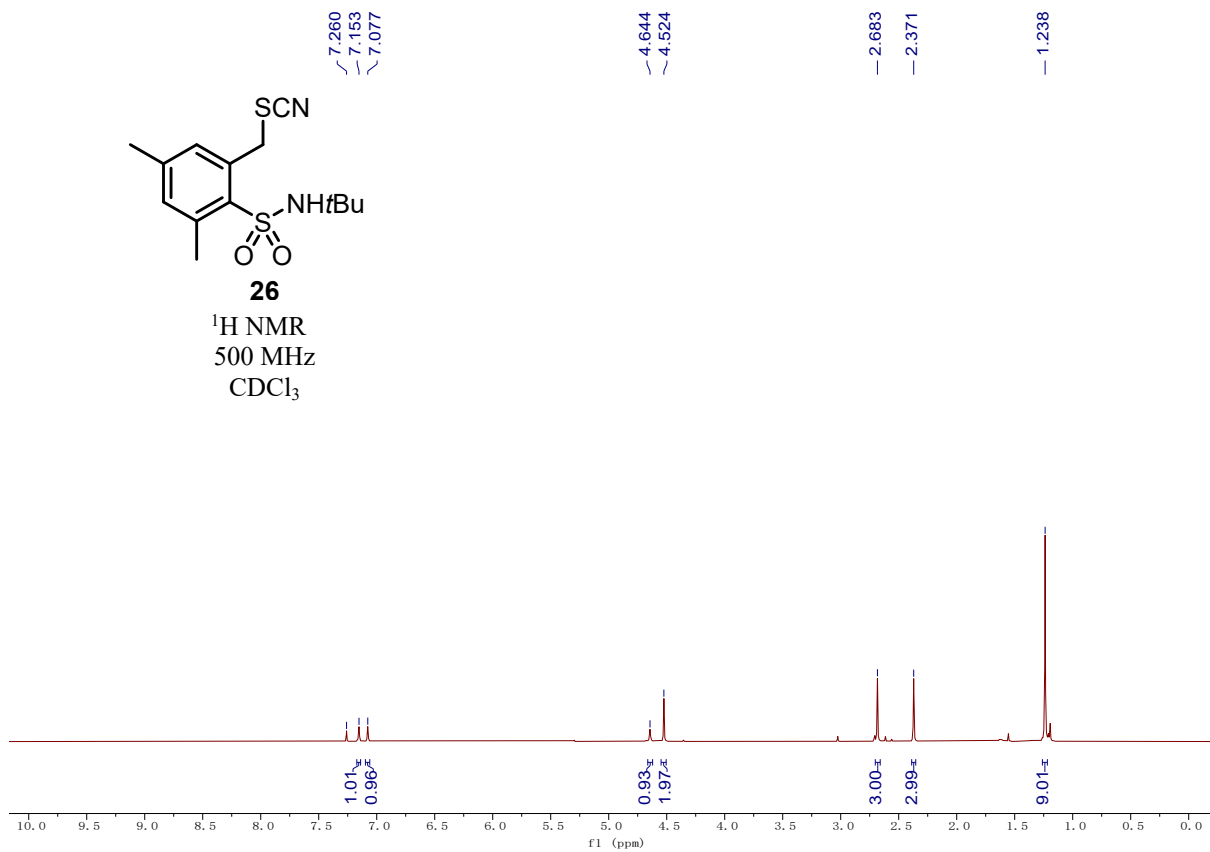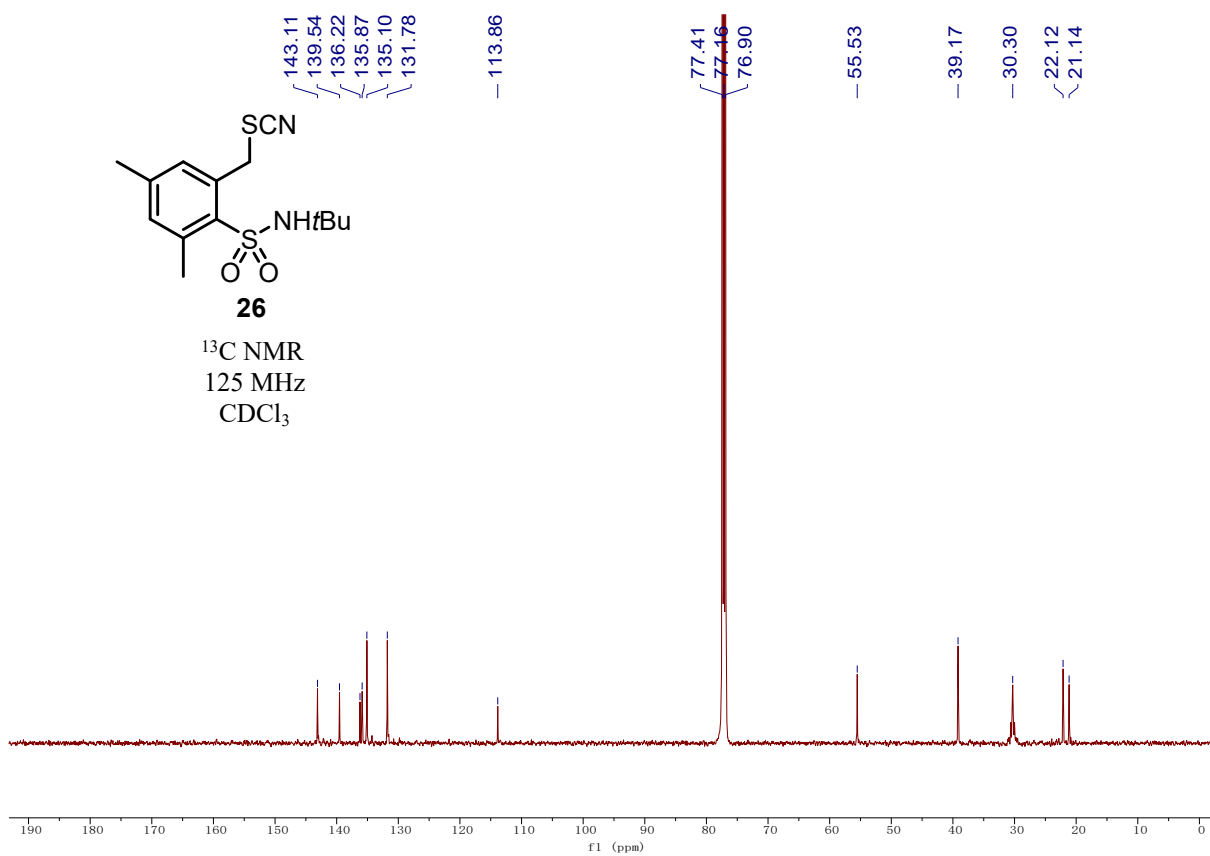

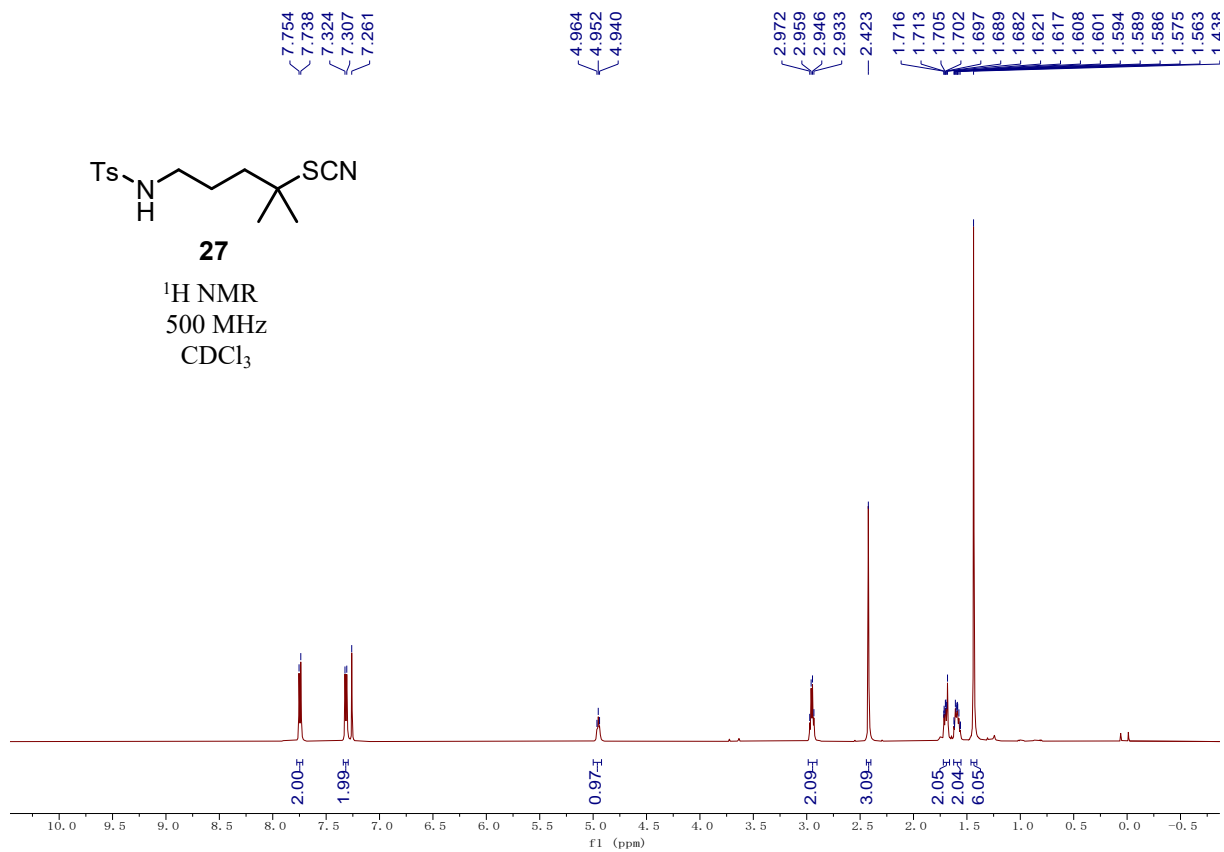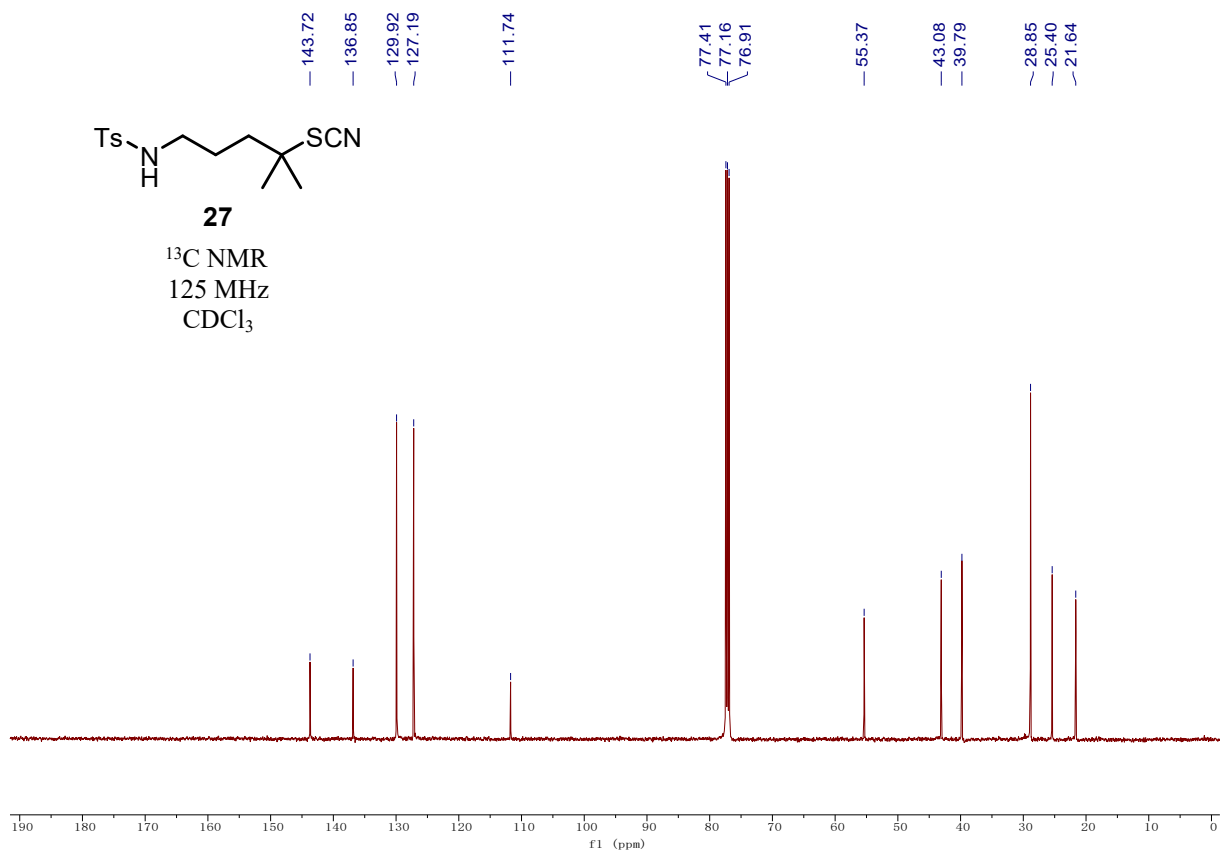

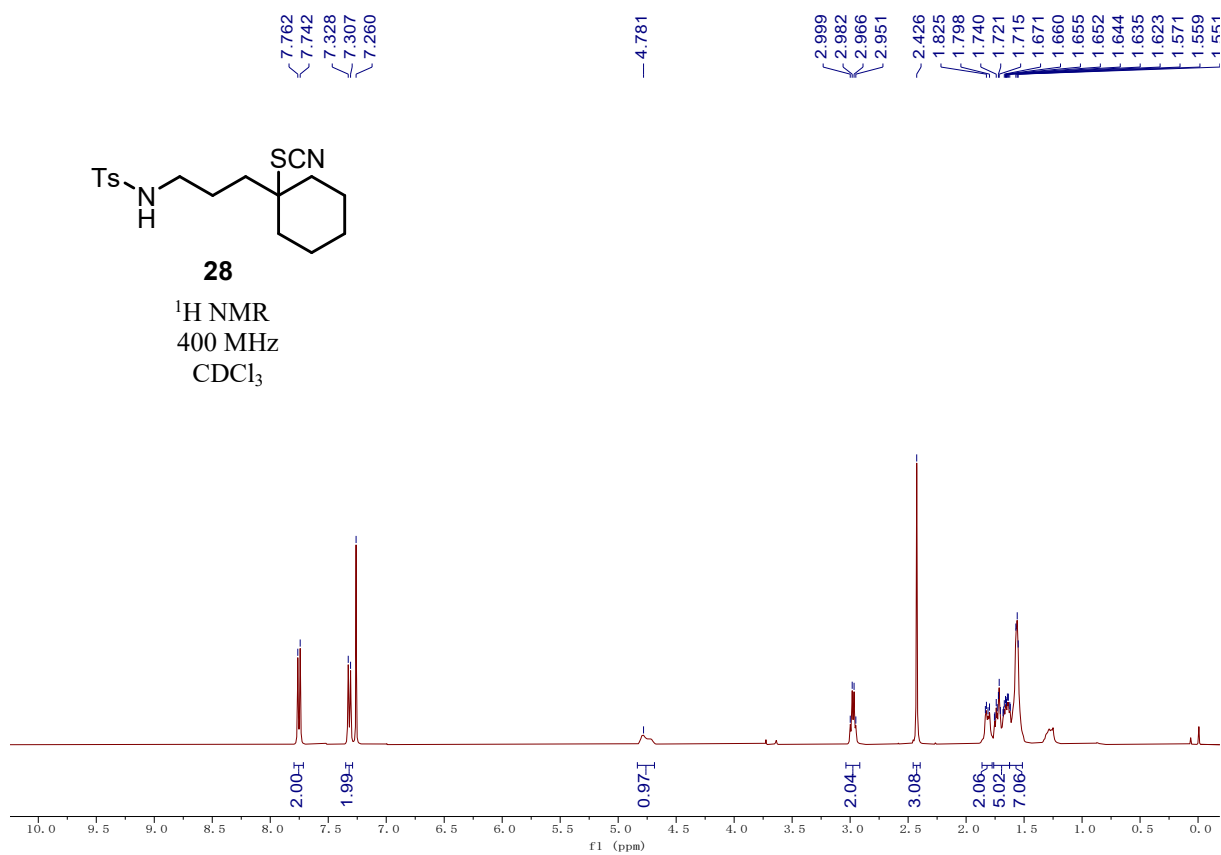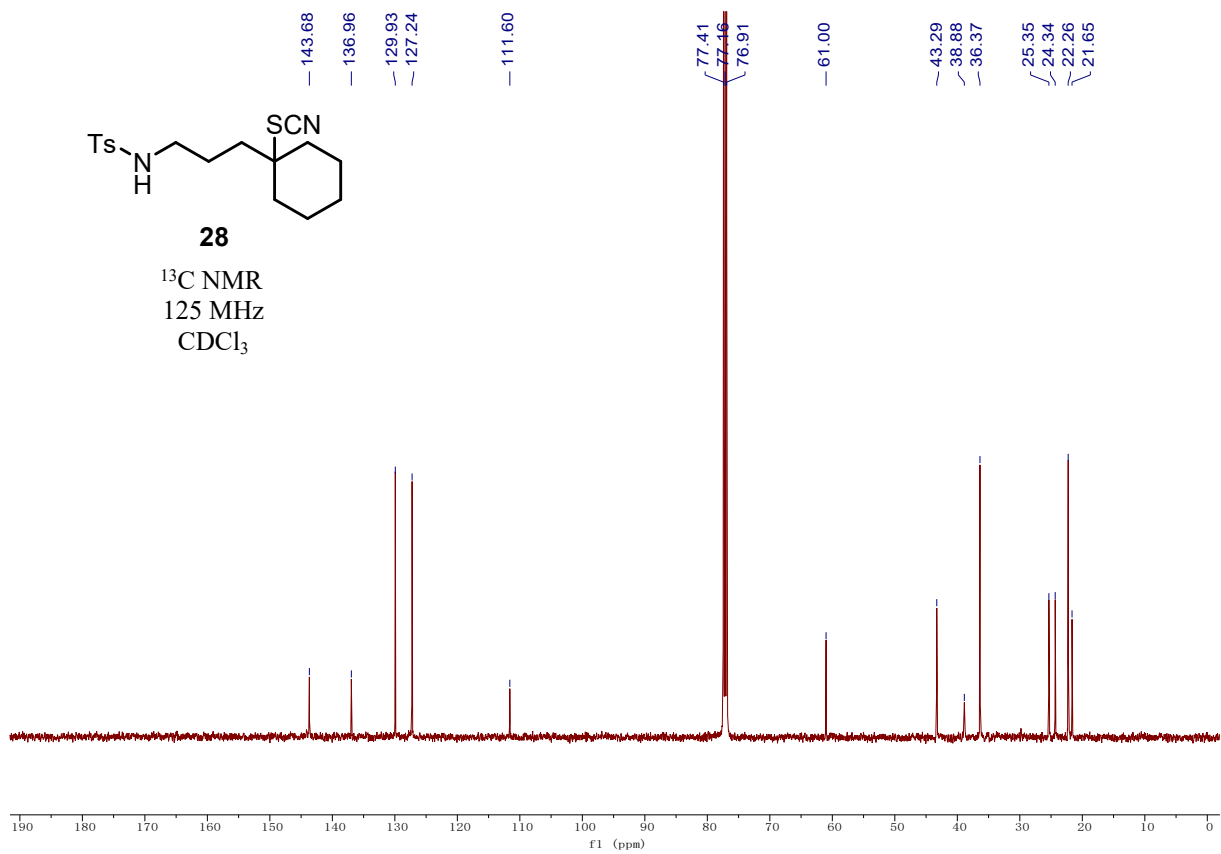



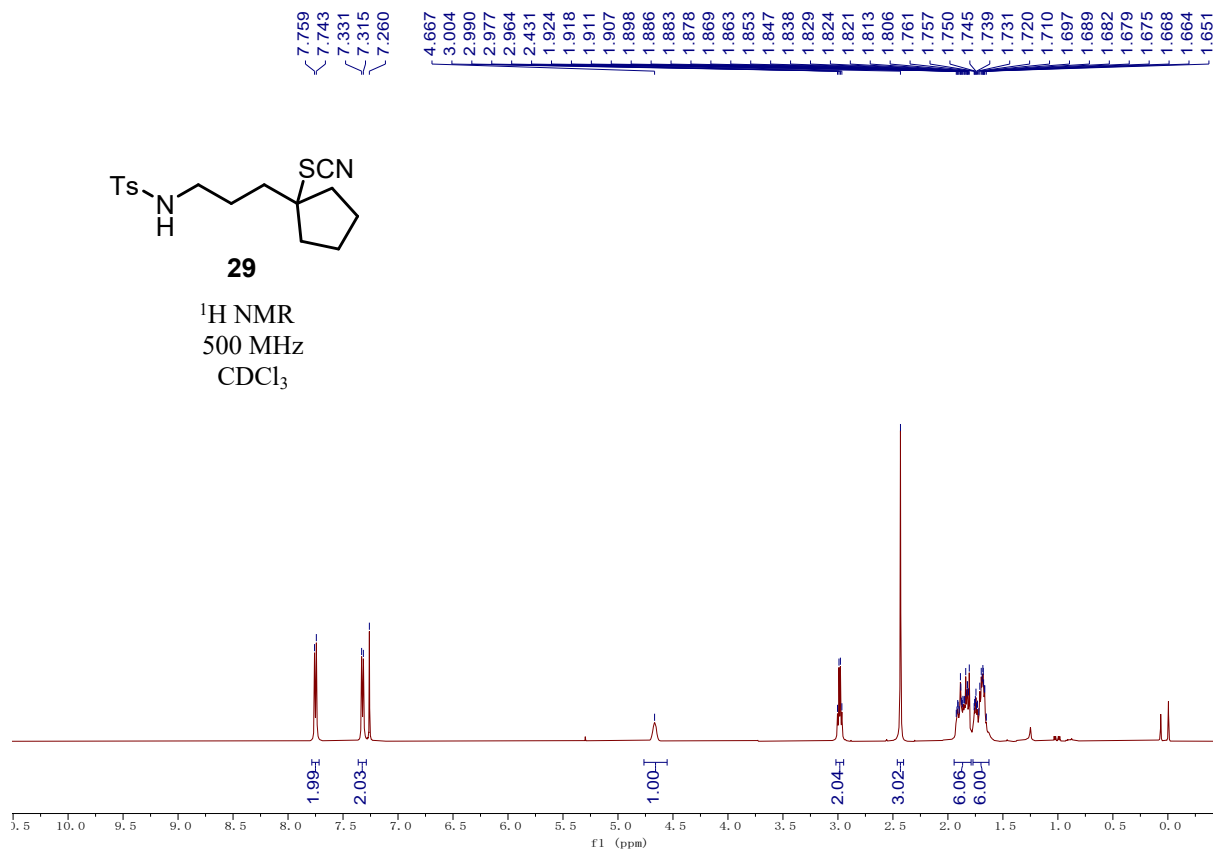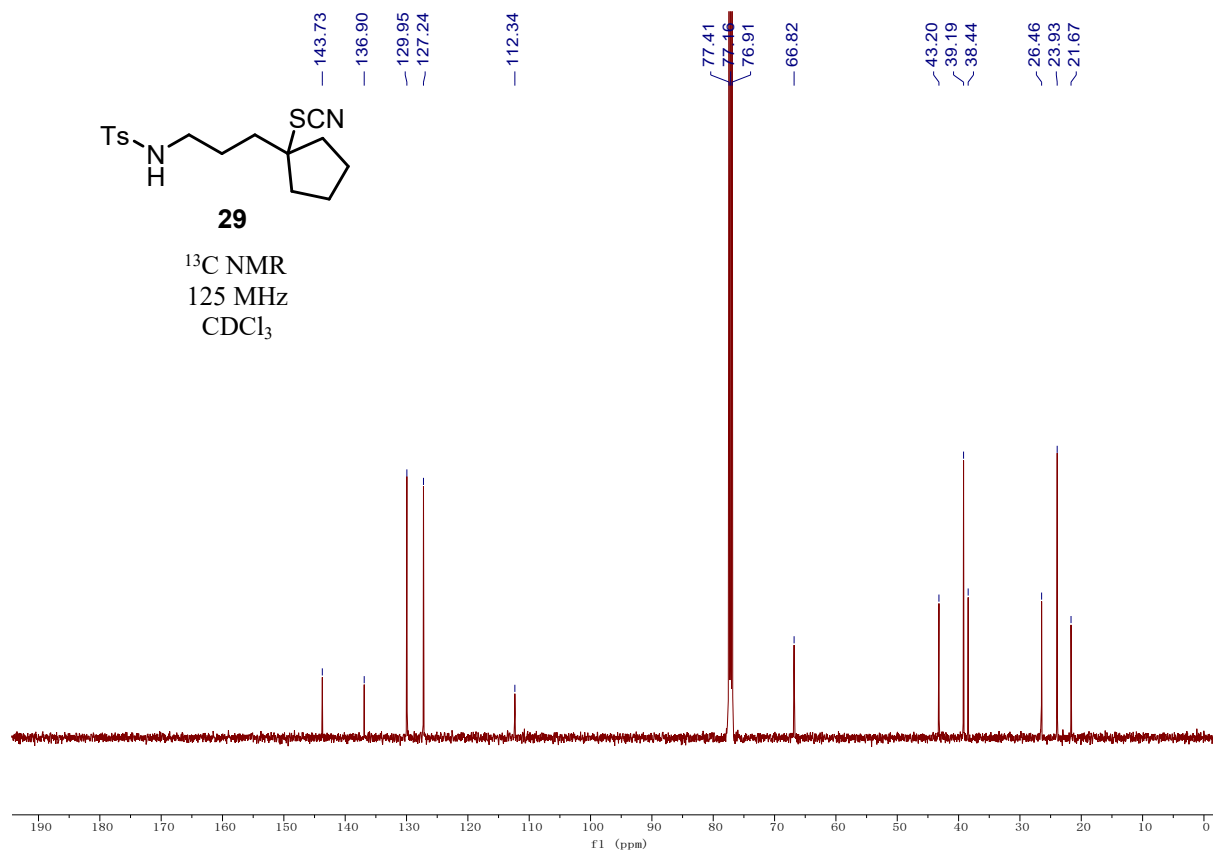

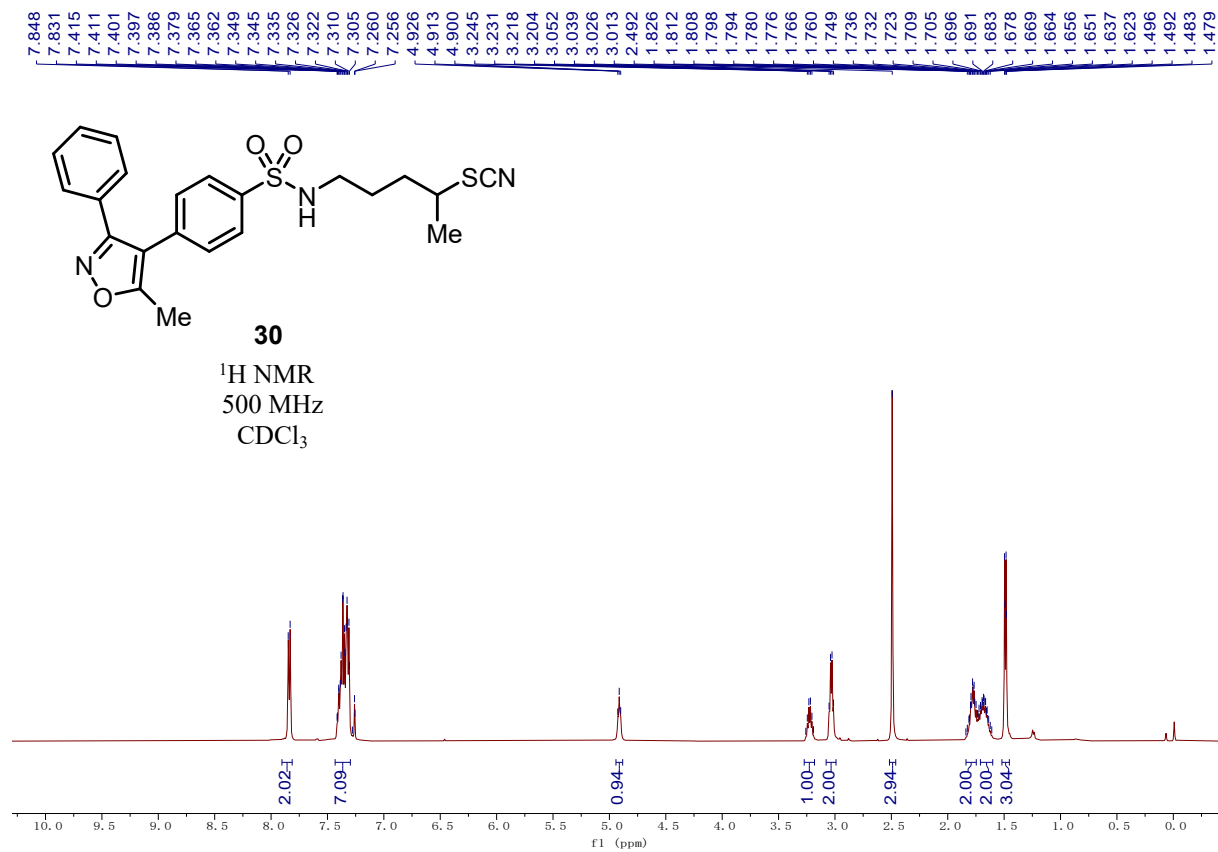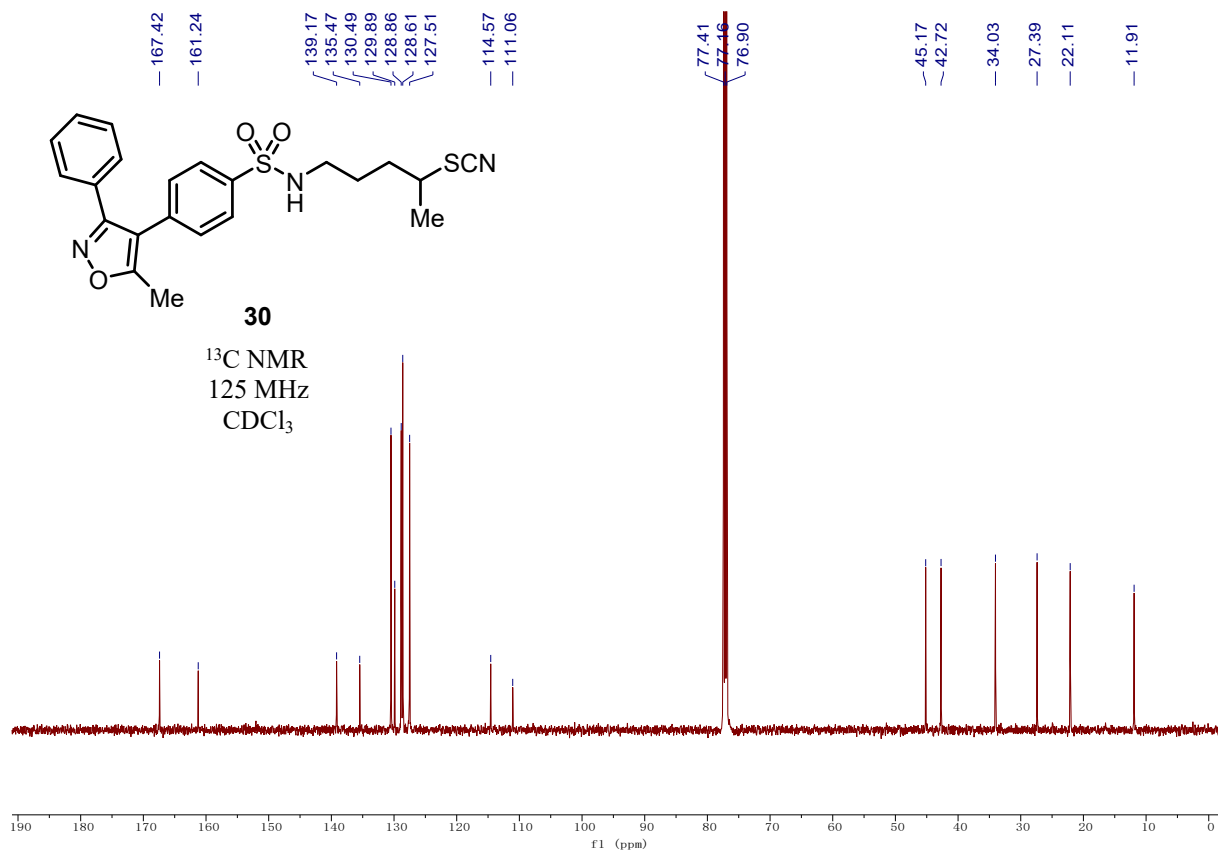

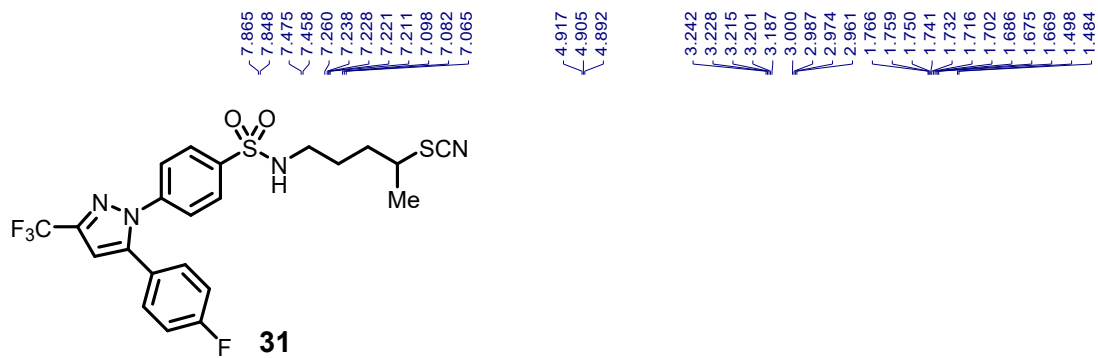

<sup>1</sup>H NMR  
 500 MHz  
 CDCl<sub>3</sub>

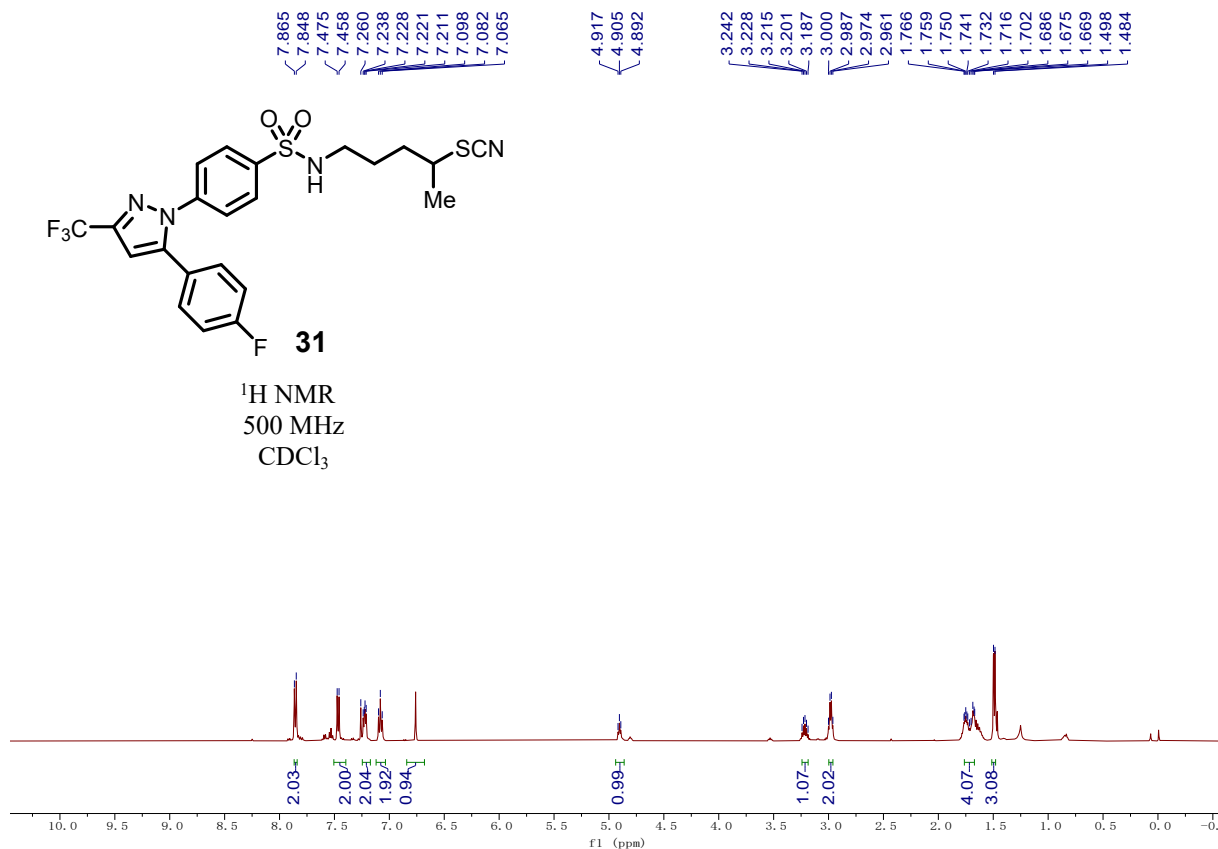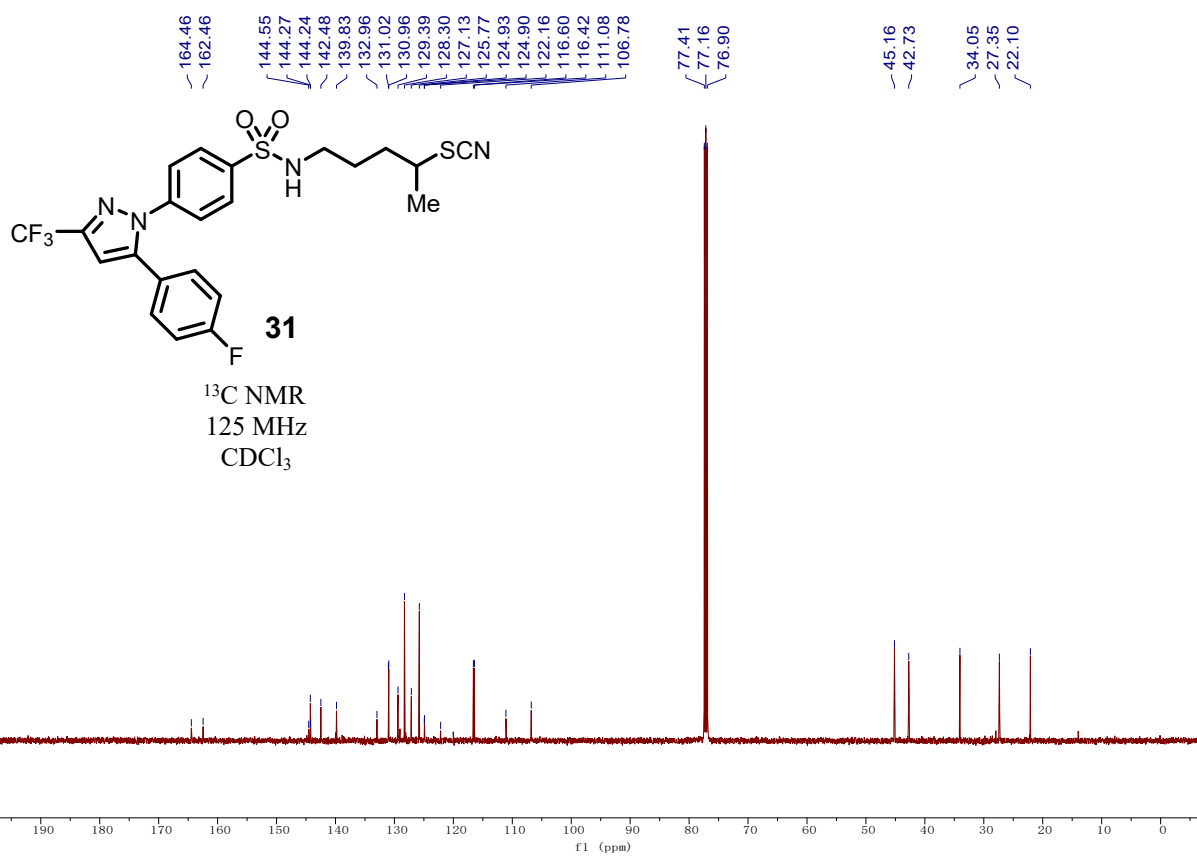

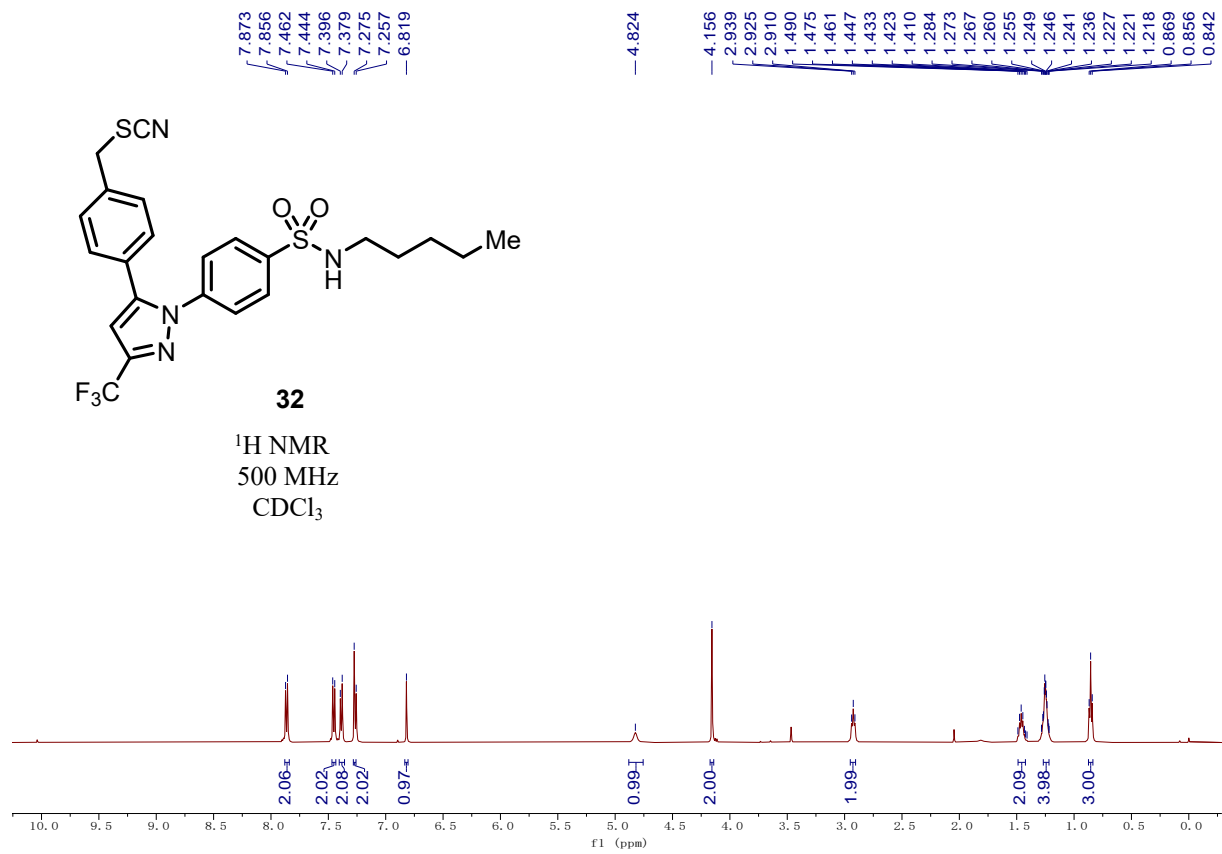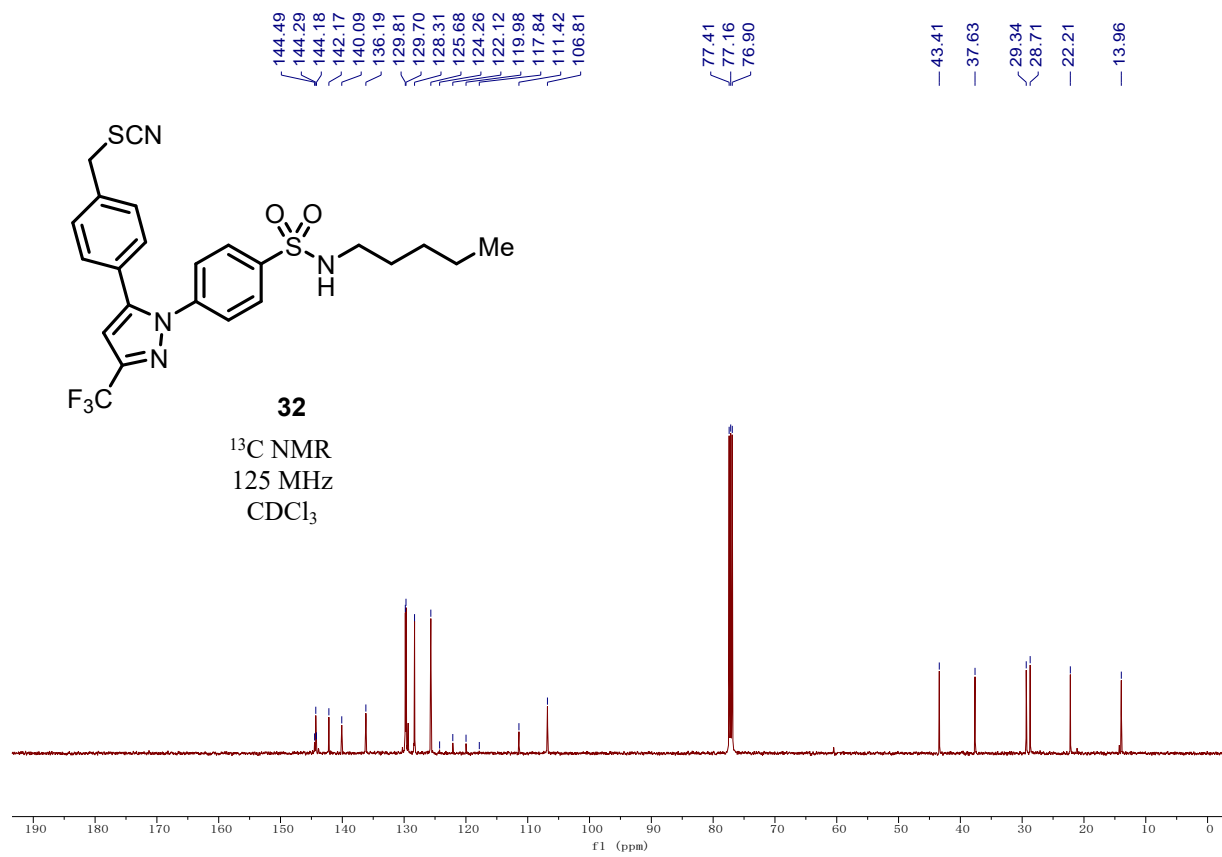

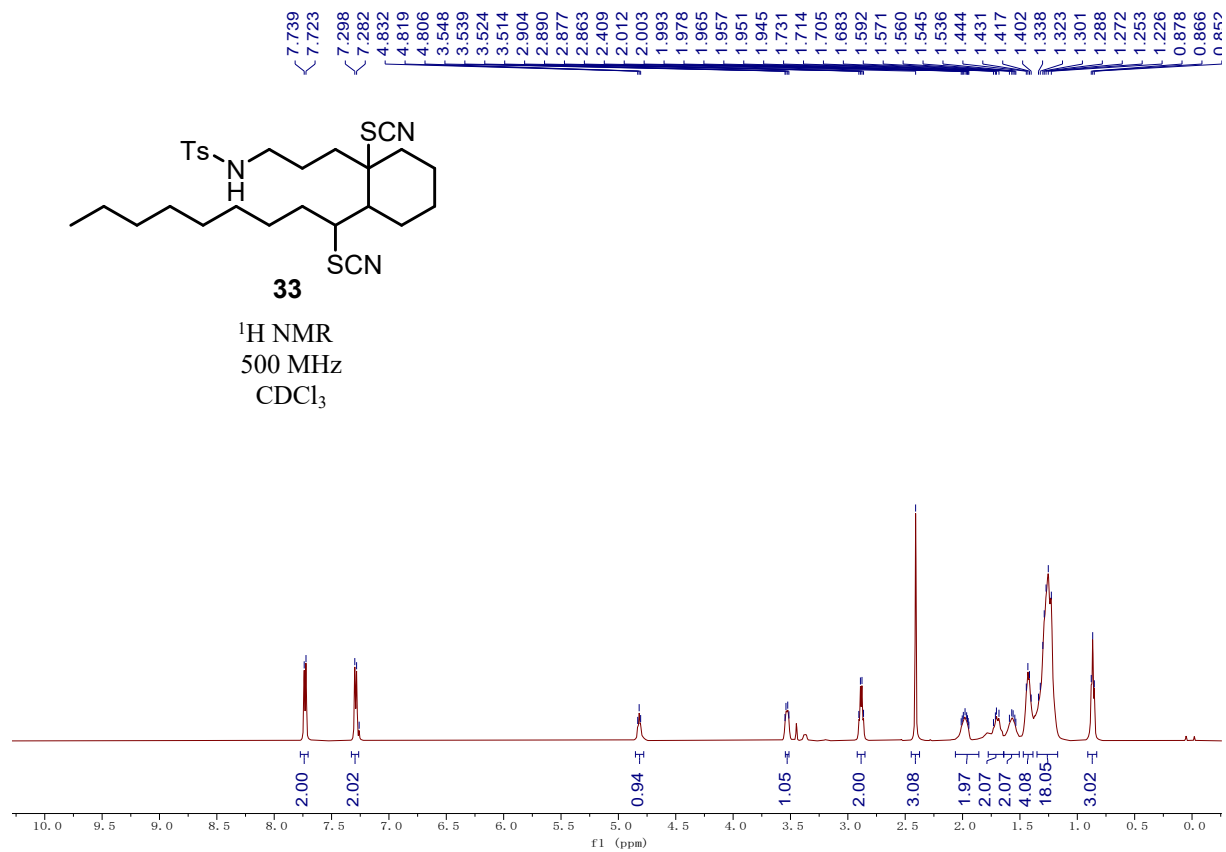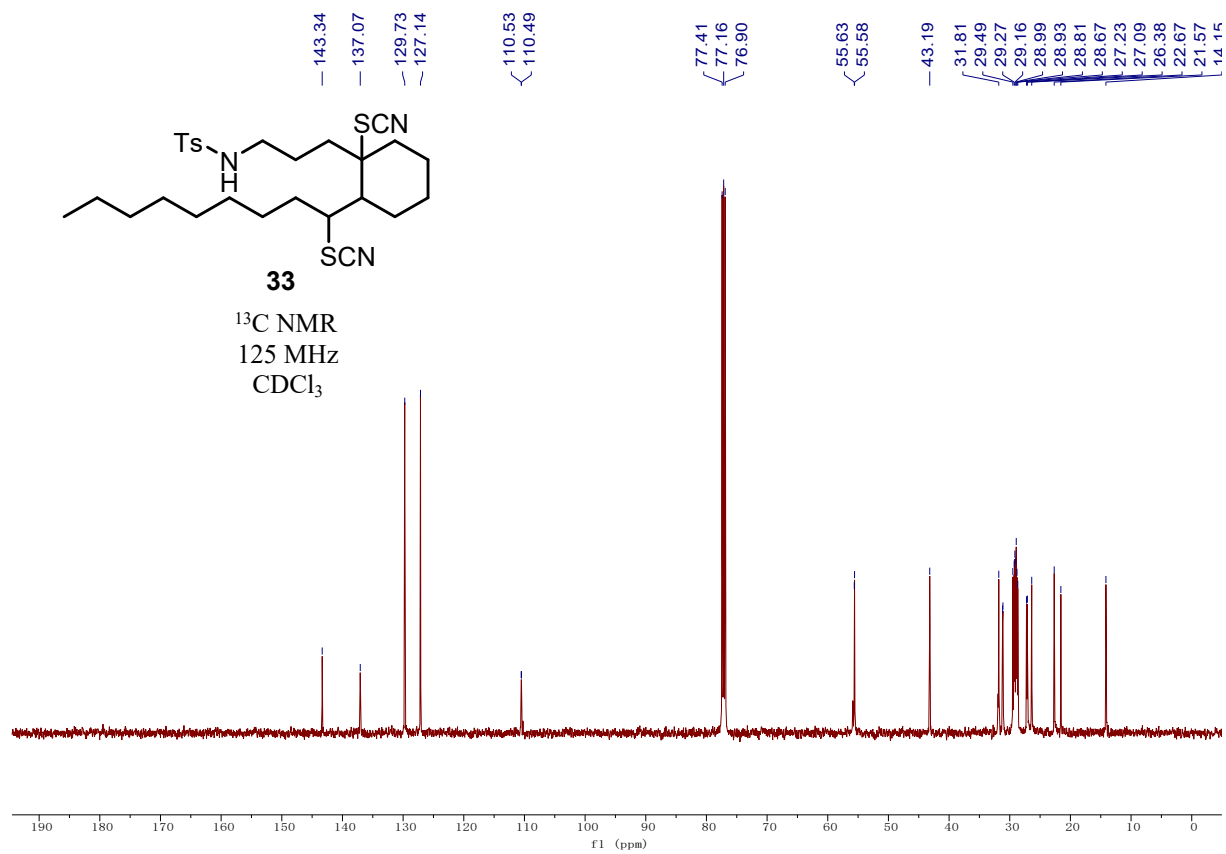

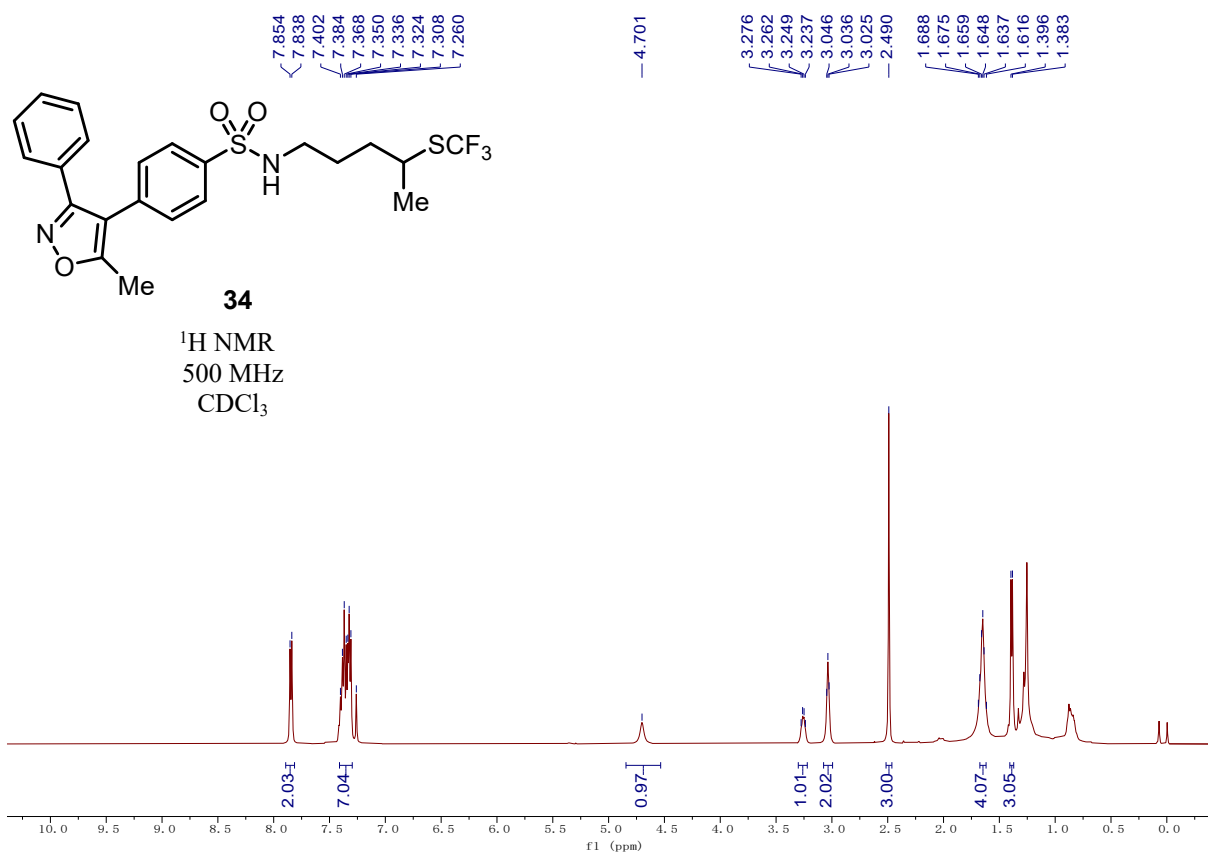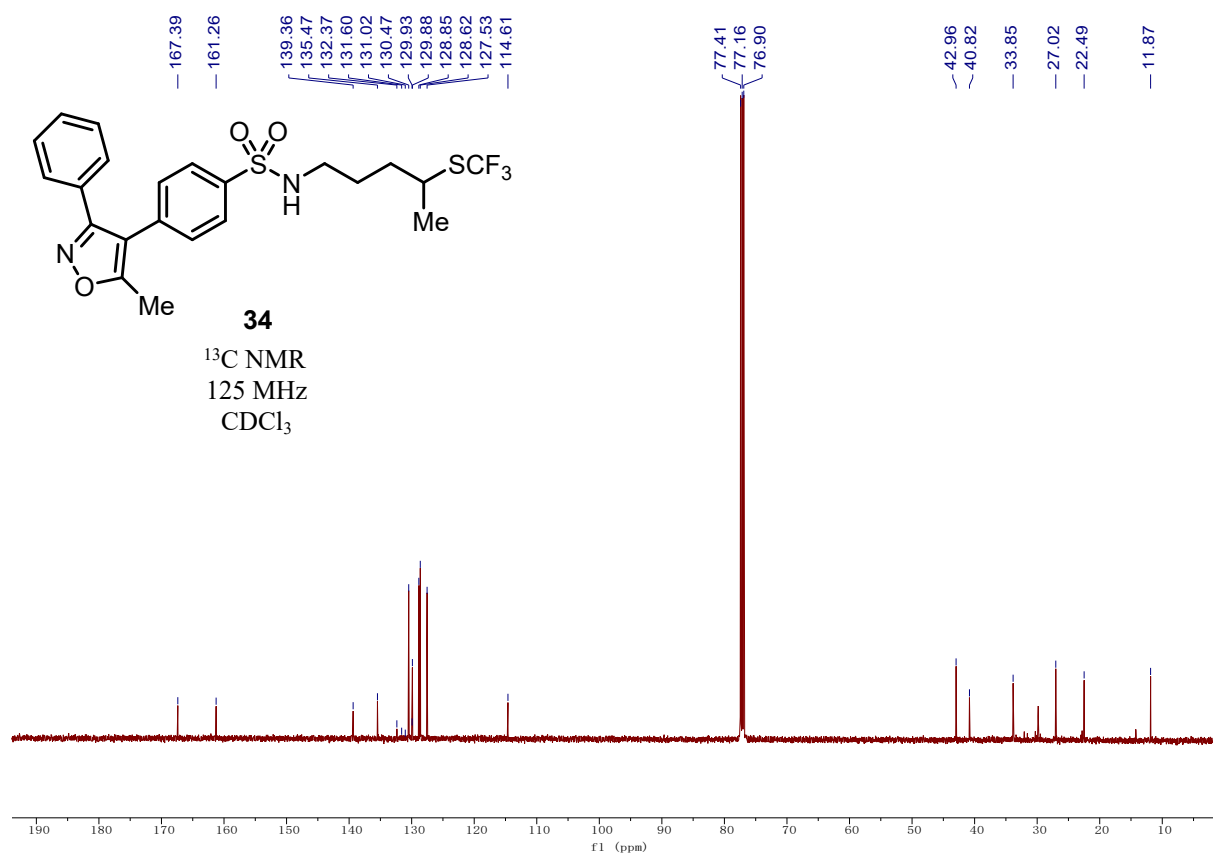

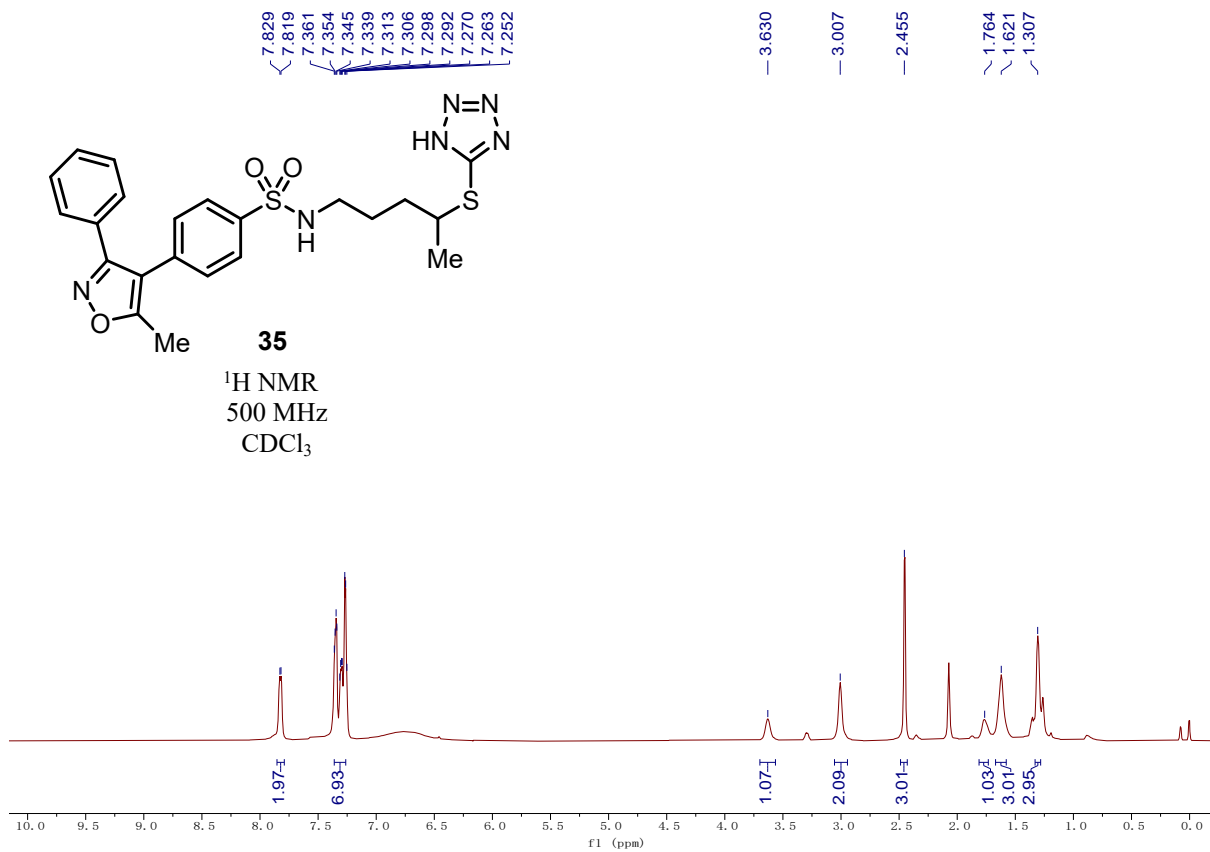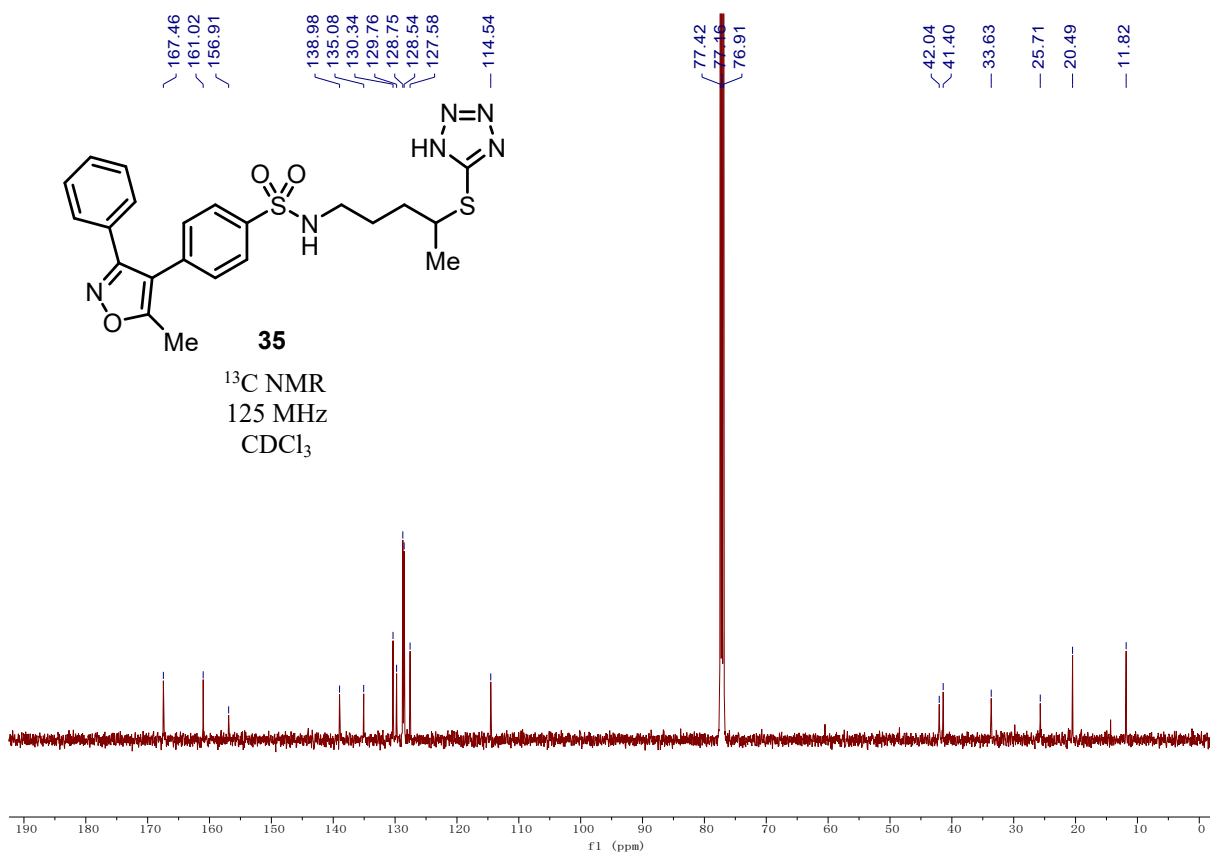

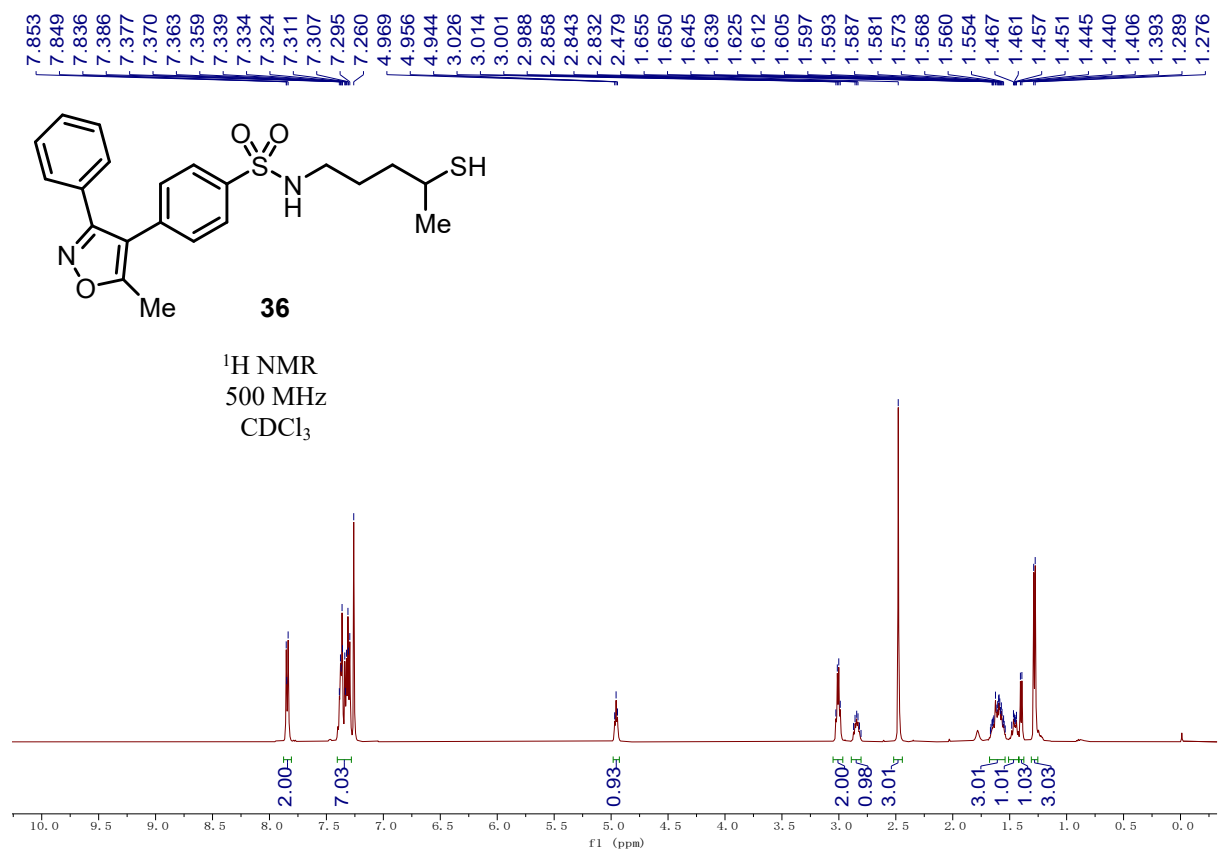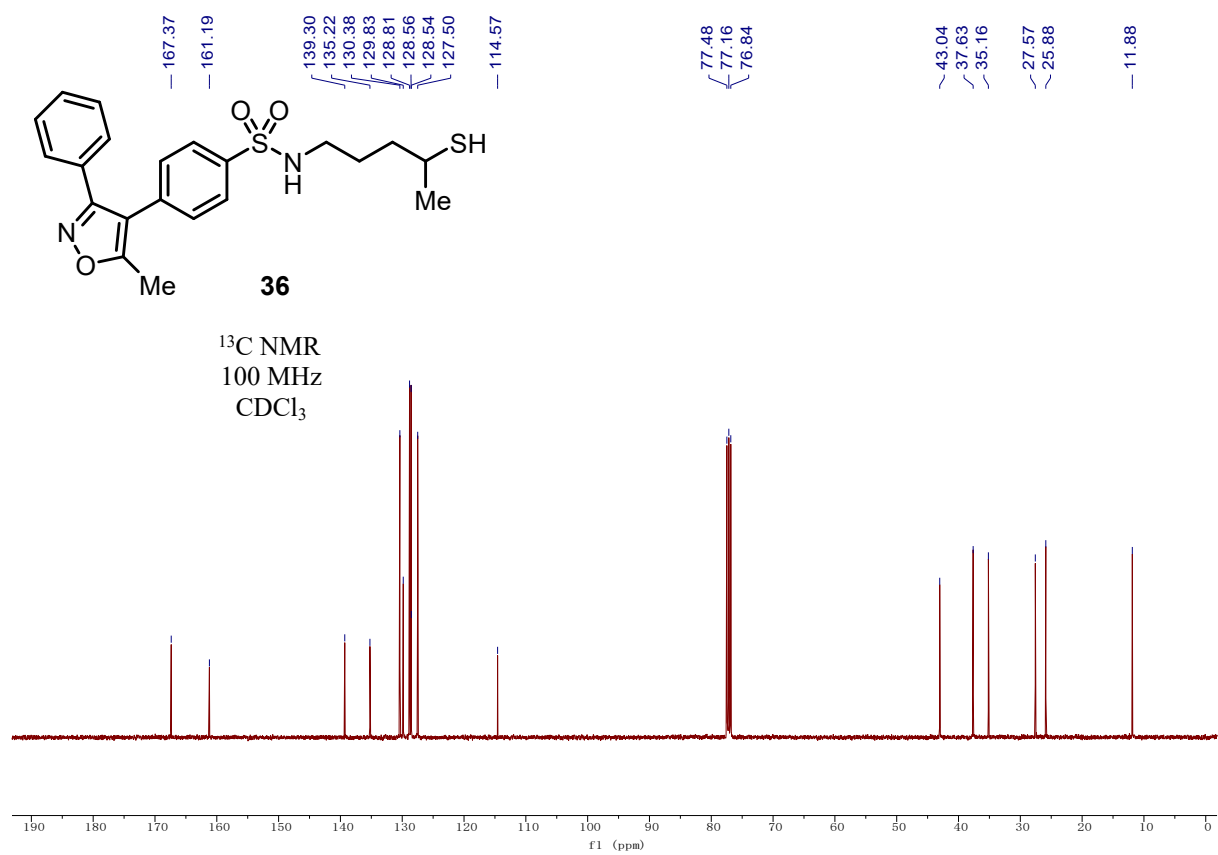



7.737  
7.721  
7.303  
7.287  
7.260  
4.873  
4.861  
4.848  
3.345  
3.328  
3.328  
3.323  
3.320  
3.320  
2.909  
2.896  
2.882  
2.869  
2.412  
1.998  
1.998  
1.989  
1.989  
1.985  
1.985  
1.978  
1.978  
1.973  
1.973  
1.969  
1.969  
1.964  
1.964  
1.756  
1.747  
1.738  
1.728  
1.718  
1.718  
1.568  
1.557  
1.548  
1.536  
1.530  
1.466  
1.466  
1.454  
1.440  
1.426  
1.426  
1.413  
1.410  
1.399  
1.392  
1.387  
1.380  
1.302  
1.289  
1.273  
1.260  
1.248  
1.238  
1.230

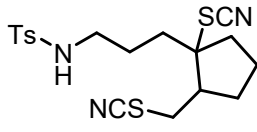

**37**

<sup>1</sup>H NMR  
500 MHz  
CDCl<sub>3</sub>

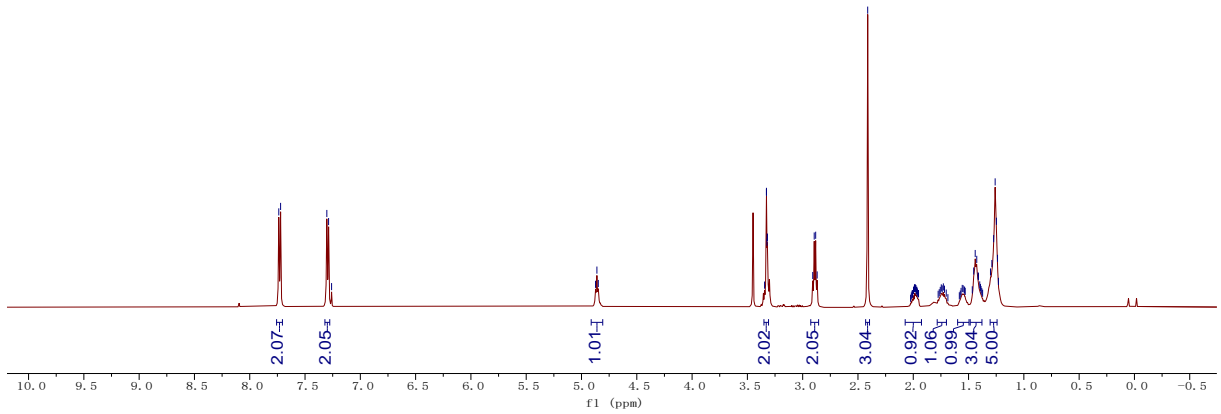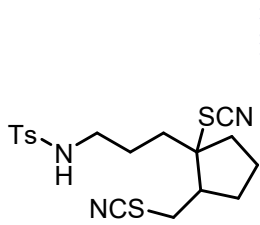

**37**

<sup>13</sup>C NMR  
125 MHz  
CDCl<sub>3</sub>

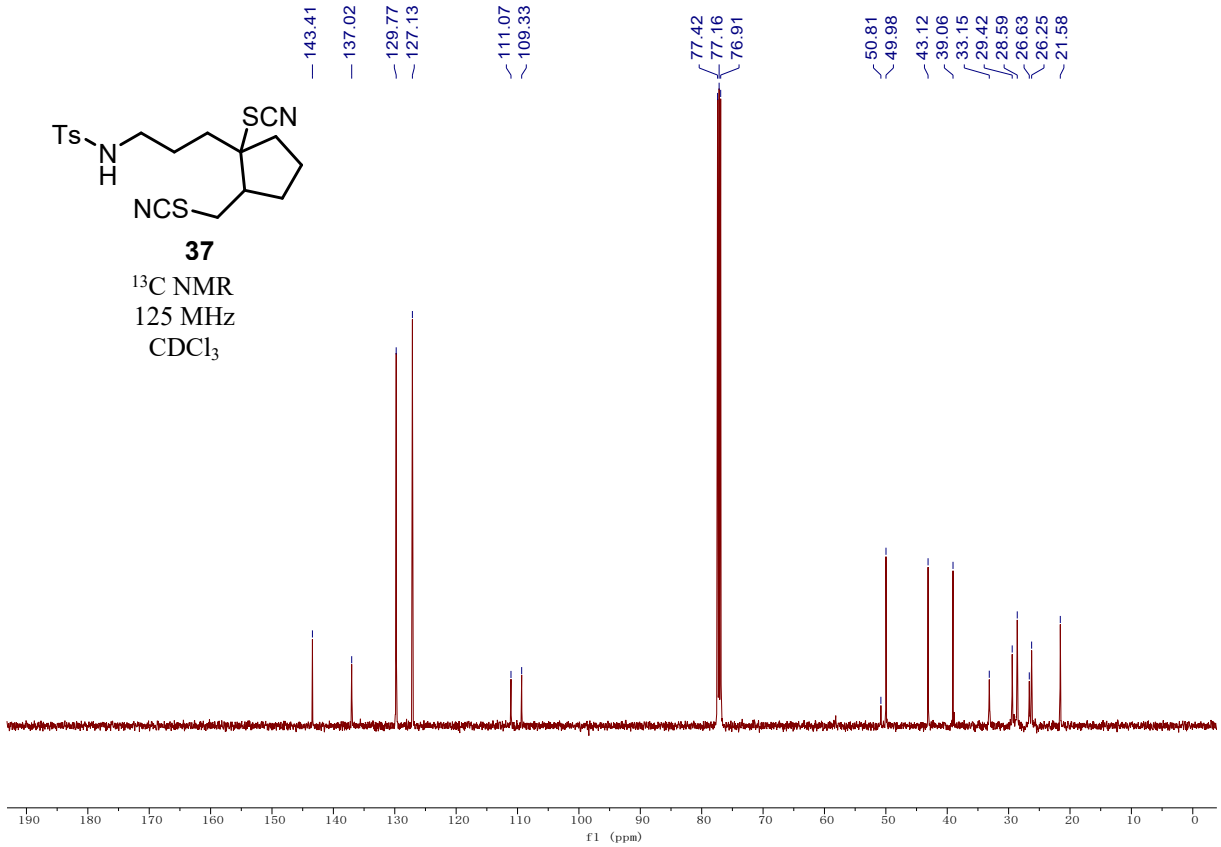

## 10. Theoretical calculations

### Computational details:

All calculations were performed using Gaussian 16, Revision A.03 package.<sup>[21]</sup> All of the reactants, intermediates, transition states, products were optimized by the DFT with the M06-2X functional.<sup>[22]</sup> For geometry optimizations and frequency calculations, BS-I basis set system was employed. In BS-I, we employed 6-31+G(d) basis sets for all atoms. All the stationary structures were characterized with no imaginary frequency and the transition state structures (TSs) were characterized with a single imaginary frequency. Intrinsic reaction coordinate (IRC) calculations were performed on the TSs. The solvent effect of hexafluoro-propan-2-ol (HFIP) ( $\epsilon = 16.7$ ) was evaluated through the SMD method,<sup>[23]</sup> in which a better basis system BS-II was used. In BSII, we employed def2-TZVP basis sets for all atoms. All reported energies are free energies at a concentration of 1 M and a temperature of 298.15 K.

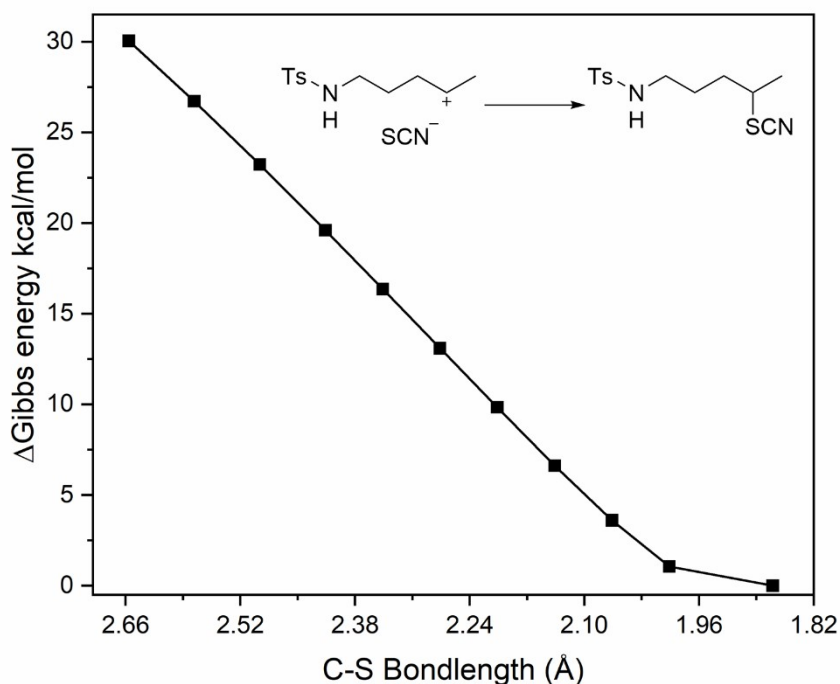

**Figure S4.** The scanned energy change along with the formation of C-S bond.

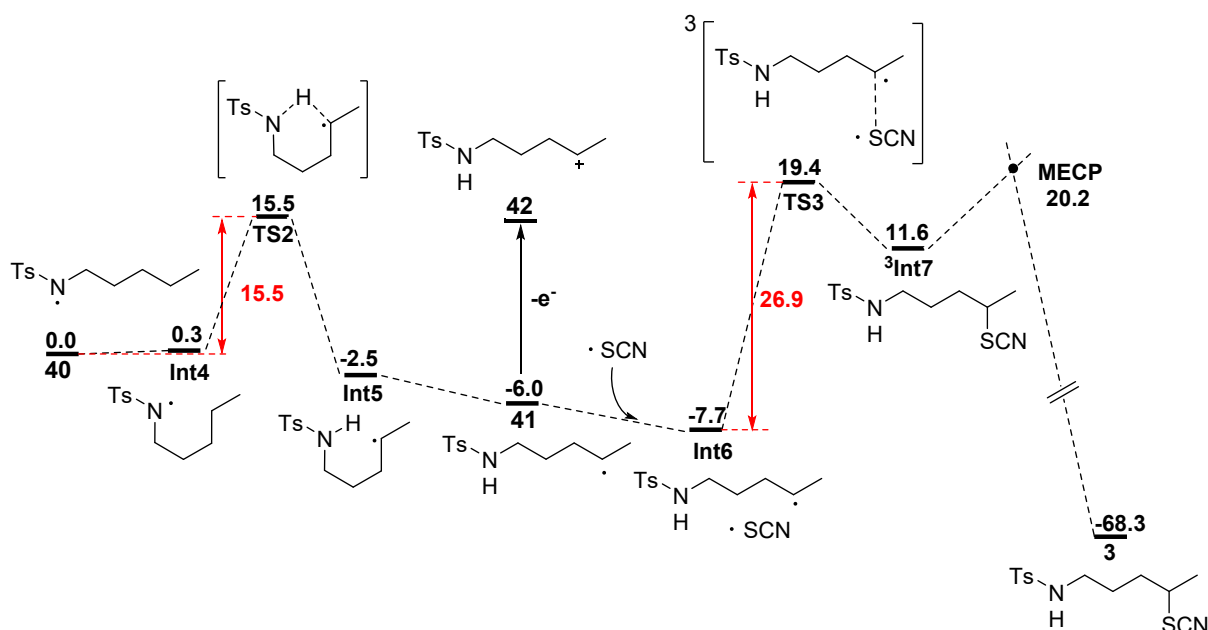

Figure S5. DFT calculated Gibbs free energy profiles for the radical coupling process (in kcal/mol).

### Cartesian coordinates of the optimized structures

|                         |             |               |            |            |
|-------------------------|-------------|---------------|------------|------------|
| <b>1</b>                |             | H -1.05067300 | 4.65407400 | 2.74046800 |
| E = -1071.7237480 a.u.  |             | H -1.53054600 | 5.94129200 | 1.64336200 |
|                         |             | C -2.69355100 | 5.85802600 | 3.46225700 |
| 0 1                     |             | H -3.07123400 | 5.11754200 | 4.17608700 |
| S -2.90105100           | 0.72786200  | -2.33081300   |            |            |
| O -2.06398100           | 0.54367100  | -3.50861900   |            |            |
| O -4.31824100           | 1.04623000  | -2.46355500   |            |            |
| C -2.77834100           | -0.70290200 | -1.28411300   |            |            |
| C -1.54333600           | -1.33757100 | -1.15180900   |            |            |
| C -1.44954500           | -2.45569900 | -0.33503400   |            |            |
| C -2.57141600           | -2.94885300 | 0.34832600    |            |            |
| C -3.79427600           | -2.29371900 | 0.19284900    |            |            |
| C -3.90837600           | -1.16858200 | -0.62445200   |            |            |
| H -0.67978900           | -0.95713600 | -1.68930600   |            |            |
| H -0.49362400           | -2.96227900 | -0.22600800   |            |            |
| H -4.67267000           | -2.66847600 | 0.71142900    |            |            |
| H -4.85859200           | -0.66203600 | -0.76315500   |            |            |
| C -2.44687900           | -4.17154800 | 1.22046300    |            |            |
| H -3.38704500           | -4.39319700 | 1.73168300    |            |            |
| H -2.17104000           | -5.04761200 | 0.62389200    |            |            |
| H -1.67003100           | -4.03375900 | 1.97954300    |            |            |
| N -2.11478500           | 1.88847900  | -1.41883000   |            |            |
| H -1.67531300           | 2.54607400  | -2.06392000   |            |            |
| C -2.89957600           | 2.53004000  | -0.35728700   |            |            |
| H -3.25132500           | 1.73664400  | 0.31364000    |            |            |
| H -3.78506800           | 3.03629000  | -0.76350600   |            |            |
| C -2.02152500           | 3.50625300  | 0.41522200    |            |            |
| H -1.63209500           | 4.26944000  | -0.27401500   |            |            |
| H -1.15390800           | 2.96709100  | 0.81487300    |            |            |
| C -2.78456600           | 4.19158600  | 1.54732200    |            |            |
| H -3.17802900           | 3.42986100  | 2.23540600    |            |            |
| H -3.65751600           | 4.71795100  | 1.13637500    |            |            |
| C -1.92279300           | 5.18057700  | 2.33111500    |            |            |
|                         |             |               |            |            |
| <b>3</b>                |             | H -1.05067300 | 4.65407400 | 2.74046800 |
| E = -1562.08245935 a.u. |             | H -1.53054600 | 5.94129200 | 1.64336200 |
|                         |             | C -2.69355100 | 5.85802600 | 3.46225700 |
| 0 1                     |             | H -3.07123400 | 5.11754200 | 4.17608700 |
| S -1.75297400           | 0.94202200  | -1.84571900   |            |            |
| O -0.97085900           | 0.59294100  | -3.01920800   |            |            |
| O -2.86725000           | 1.87630900  | -1.88726300   |            |            |
| C -2.36944200           | -0.57143900 | -1.13285600   |            |            |
| C -1.61633900           | -1.73843200 | -1.26763000   |            |            |
| C -2.07994400           | -2.91046400 | -0.68412400   |            |            |
| C -3.28746800           | -2.93580300 | 0.02836200    |            |            |
| C -4.02541800           | -1.75507100 | 0.13811300    |            |            |
| C -3.57551200           | -0.56838700 | -0.44045300   |            |            |
| H -0.69579200           | -1.72507300 | -1.84445700   |            |            |
| H -1.50467000           | -3.82692800 | -0.79139300   |            |            |
| H -4.97058200           | -1.76283000 | 0.67442100    |            |            |
| H -4.16006700           | 0.34481300  | -0.38193800   |            |            |
| C -3.77681100           | -4.22205100 | 0.64229600    |            |            |
| H -4.70337100           | -4.06918100 | 1.20117100    |            |            |
| H -3.96772600           | -4.97361000 | -0.13098100   |            |            |
| H -3.03042800           | -4.63789500 | 1.32684600    |            |            |
| N -0.66516600           | 1.57003700  | -0.75980800   |            |            |
| C -1.14950200           | 2.02651700  | 0.54645800    |            |            |
| H -0.35260800           | 1.83418000  | 1.27263600    |            |            |
| H -2.01796100           | 1.43248300  | 0.86832200    |            |            |
| C -1.50055500           | 3.51167500  | 0.52601400    |            |            |
| H -2.24378600           | 3.68620700  | -0.25974500   |            |            |

|   |             |            |             |
|---|-------------|------------|-------------|
| H | -0.60214700 | 4.07472700 | 0.24768300  |
| C | -2.04484800 | 3.96715700 | 1.87907900  |
| H | -1.30093900 | 3.80429400 | 2.67292900  |
| H | -2.91664900 | 3.35235700 | 2.14274600  |
| C | -2.51305000 | 5.42293300 | 1.92798500  |
| H | -3.19356400 | 5.61886100 | 1.09305900  |
| C | -3.17341700 | 5.76910300 | 3.25439700  |
| H | -2.48821400 | 5.58025300 | 4.08719000  |
| H | -3.48499400 | 6.81630500 | 3.29098800  |
| H | -4.06399500 | 5.14492200 | 3.38770600  |
| H | 0.20190300  | 1.04153500 | -0.76480400 |
| S | -1.00988100 | 6.47023200 | 1.62967100  |
| C | -1.72811000 | 8.00431100 | 1.74618800  |
| N | -2.20977100 | 9.05710800 | 1.82832100  |

**47**

E = -1071.05852649 a.u.

0 2

|   |             |             |             |
|---|-------------|-------------|-------------|
| S | -3.77704400 | 0.57119100  | -0.95606900 |
| O | -3.32998300 | 1.06463000  | -2.25408300 |
| O | -5.18031900 | 0.65377800  | -0.56578400 |
| C | -3.22623000 | -1.09834300 | -0.75920200 |
| C | -2.12863100 | -1.54004000 | -1.49246600 |
| C | -1.69350300 | -2.84946400 | -1.31854800 |
| C | -2.33878300 | -3.71213500 | -0.42439700 |
| C | -3.44409300 | -3.23825800 | 0.29071200  |
| C | -3.89562200 | -1.93166700 | 0.13121600  |
| H | -1.64126400 | -0.87037000 | -2.19427500 |
| H | -0.84300000 | -3.21119900 | -1.89060500 |
| H | -3.96225100 | -3.90316900 | 0.97665400  |
| H | -4.76100600 | -1.56246000 | 0.67277700  |
| C | -1.83881900 | -5.11960700 | -0.22511000 |
| H | -2.63416600 | -5.77634800 | 0.13708200  |
| H | -1.44606100 | -5.53629800 | -1.15677500 |
| H | -1.02910500 | -5.13803800 | 0.51322600  |
| N | -2.87311600 | 1.37566500  | 0.23074100  |
| C | -3.16940400 | 2.79406500  | 0.25147400  |
| H | -4.25023000 | 2.92978400  | 0.42417200  |
| H | -2.96630700 | 3.21513000  | -0.74745000 |
| C | -2.34843700 | 3.49904000  | 1.32293900  |
| H | -1.28333800 | 3.32759400  | 1.12437400  |
| H | -2.56753800 | 3.04239000  | 2.29592900  |
| C | -2.63857700 | 4.99784800  | 1.36972000  |
| H | -3.70977900 | 5.15961900  | 1.55760600  |
| H | -2.42690300 | 5.44448000  | 0.38755600  |
| C | -1.82476100 | 5.72513900  | 2.43914000  |
| H | -2.03736500 | 5.27878800  | 3.41942200  |
| H | -0.75540200 | 5.56288900  | 2.25061900  |
| C | -2.11940600 | 7.22310500  | 2.48003800  |
| H | -3.17807800 | 7.40756800  | 2.69376000  |
| H | -1.52889700 | 7.72761500  | 3.25080000  |
| H | -1.88769000 | 7.69345800  | 1.51798200  |

**48**

E = -1071.0592089 a.u.

0 2

|   |             |            |             |
|---|-------------|------------|-------------|
| S | -2.41318900 | 0.73475000 | -2.36530400 |
|---|-------------|------------|-------------|

|   |             |             |             |
|---|-------------|-------------|-------------|
| O | -1.35440200 | 0.50007200  | -3.33405100 |
| O | -3.76109000 | 1.11632500  | -2.75327500 |
| C | -2.55172000 | -0.72024800 | -1.34399400 |
| C | -1.43559100 | -1.53804500 | -1.16997400 |
| C | -1.53439400 | -2.64339900 | -0.33329500 |
| C | -2.73218100 | -2.94419200 | 0.32953900  |
| C | -3.83533900 | -2.10965700 | 0.13225700  |
| C | -3.75519300 | -0.99666100 | -0.70351400 |
| H | -0.51583100 | -1.31637900 | -1.70376100 |
| H | -0.67233500 | -3.29221800 | -0.19793500 |
| H | -4.77354500 | -2.33620100 | 0.63192000  |
| H | -4.61657600 | -0.35826400 | -0.87651600 |
| C | -2.82319700 | -4.15936800 | 1.21637300  |
| H | -3.76850800 | -4.18205900 | 1.76440800  |
| H | -2.75520900 | -5.07768900 | 0.62311400  |
| H | -2.00567200 | -4.17729800 | 1.94393300  |
| N | -1.84622300 | 1.94654100  | -1.37752200 |
| C | -2.64291700 | 2.31957400  | -0.20694600 |
| H | -2.63646700 | 1.52562500  | 0.55684600  |
| H | -3.67376700 | 2.44944200  | -0.55123000 |
| C | -2.11837800 | 3.62285000  | 0.38334300  |
| H | -2.15671300 | 4.39996700  | -0.38878700 |
| H | -1.06378900 | 3.50438200  | 0.66732400  |
| C | -2.92007100 | 4.05895500  | 1.61073000  |
| H | -2.88826800 | 3.26888400  | 2.37681400  |
| H | -3.98567500 | 4.14690900  | 1.32719700  |
| C | -2.43490600 | 5.34185700  | 2.20024100  |
| H | -1.99826100 | 6.07888200  | 1.53076800  |
| C | -2.89943500 | 5.77609500  | 3.54881400  |
| H | -2.81110300 | 4.96224300  | 4.27994600  |
| H | -2.32808200 | 6.63109900  | 3.92081100  |
| H | -3.96152900 | 6.07338000  | 3.54053200  |
| H | -0.85412600 | 1.80990600  | -1.19107200 |

**49**

E = -1070.80997156 a.u.

1 1

|   |             |             |             |
|---|-------------|-------------|-------------|
| S | -2.59746200 | 1.33266300  | 0.29107500  |
| O | -1.86950400 | 2.10960100  | -0.71434900 |
| O | -3.89440100 | 1.84199200  | 0.74212600  |
| C | -2.70361200 | -0.34067200 | -0.22832800 |
| C | -1.98130900 | -0.74675900 | -1.34606600 |
| C | -2.07845000 | -2.07708900 | -1.74819200 |
| C | -2.88187700 | -2.98497300 | -1.05262600 |
| C | -3.59910700 | -2.53618000 | 0.06883900  |
| C | -3.51876700 | -1.21819300 | 0.49028900  |
| H | -1.36973000 | -0.03539300 | -1.89182700 |
| H | -1.52403800 | -2.41068700 | -2.62033700 |
| H | -4.23098600 | -3.23381100 | 0.61178400  |
| H | -4.07991200 | -0.86884000 | 1.35178200  |
| C | -2.99336600 | -4.42030300 | -1.49041400 |
| H | -4.02447800 | -4.65780400 | -1.77172500 |
| H | -2.34990400 | -4.62849800 | -2.34780600 |
| H | -2.71136500 | -5.09659300 | -0.67734000 |
| N | -1.68754600 | 1.26564600  | 1.70304600  |
| C | -1.92436800 | 2.34530600  | 2.64792400  |
| H | -1.18366000 | 2.22825800  | 3.44326400  |

|   |             |            |             |
|---|-------------|------------|-------------|
| H | -2.91140800 | 2.20313900 | 3.08856300  |
| C | -1.77633400 | 3.79850800 | 2.08095700  |
| H | -1.31999500 | 3.71898900 | 1.08301400  |
| H | -1.11479700 | 4.41623300 | 2.68957900  |
| C | -3.23026000 | 4.53537700 | 2.10224200  |
| H | -3.27190700 | 5.14074200 | 3.00601300  |
| H | -4.02395800 | 3.79722400 | 2.00018800  |
| C | -2.87058000 | 5.19721700 | 0.89838100  |
| H | -2.18303400 | 6.04263200 | 0.97488000  |
| C | -3.32583400 | 4.82129900 | -0.43689800 |
| H | -3.91264200 | 3.90360600 | -0.45433400 |
| H | -3.96750200 | 5.67742500 | -0.72680600 |
| H | -2.51221400 | 4.80239100 | -1.16896000 |
| H | -0.70522500 | 1.09615400 | 1.48943200  |

## 50

E = -1070.88612727 a.u.

1 1

|   |             |             |             |
|---|-------------|-------------|-------------|
| S | 0.33790600  | -1.35010800 | -0.39947700 |
| O | -0.71575200 | -2.28074800 | -0.08152800 |
| O | 1.62110200  | -1.73019900 | -0.93446500 |
| C | -0.27869300 | 0.10565300  | -1.13915300 |
| C | -1.65305700 | 0.35364700  | -1.10619100 |
| C | -2.11769500 | 1.53697900  | -1.66588200 |
| C | -1.23709500 | 2.45785400  | -2.25303800 |
| C | 0.13624200  | 2.16733400  | -2.27454800 |
| C | 0.62975500  | 0.99106700  | -1.72698300 |
| H | -2.33616500 | -0.37314600 | -0.67629400 |
| H | -3.18355300 | 1.74560900  | -1.65973800 |
| H | 0.82348800  | 2.86614400  | -2.74270200 |
| H | 1.68810600  | 0.74981100  | -1.77570100 |
| C | -1.75863100 | 3.71539700  | -2.88951700 |
| H | -2.70038200 | 4.03207000  | -2.43571700 |
| H | -1.03720500 | 4.53191400  | -2.80782100 |
| H | -1.94413500 | 3.54254800  | -3.95590400 |
| N | 0.82862600  | -0.72458300 | 1.27531500  |
| C | 1.51885900  | -1.82028000 | 2.06306800  |
| H | 2.55921400  | -1.88417300 | 1.74522400  |
| H | 1.00269700  | -2.75591700 | 1.82690500  |
| C | 1.27076900  | -1.39447000 | 3.50245200  |
| H | 1.94661100  | -0.57947300 | 3.78499500  |
| H | 1.43322000  | -2.22156900 | 4.19613900  |
| C | -0.18680100 | -0.92539100 | 3.46122600  |
| H | -0.45029600 | -0.27812500 | 4.30090500  |
| H | -0.85819100 | -1.78892400 | 3.47408700  |
| C | -0.32166600 | -0.17144300 | 2.12574300  |
| H | -1.24479600 | -0.44383100 | 1.60831400  |
| C | -0.18533300 | 1.33965000  | 2.22571600  |
| H | -1.03683900 | 1.74219800  | 2.77986000  |
| H | 0.72684200  | 1.61973900  | 2.76586500  |
| H | -0.17693800 | 1.81101000  | 1.23626400  |
| H | 1.50593600  | 0.02777100  | 1.09633700  |

## Int1

E = -1860.78916107 a.u.

-1 1

|   |             |            |             |
|---|-------------|------------|-------------|
| S | -4.22844700 | 1.45332500 | -2.15791300 |
|---|-------------|------------|-------------|

|   |             |             |             |
|---|-------------|-------------|-------------|
| O | -4.06499800 | 1.43483200  | -3.60956000 |
| O | -5.57591100 | 1.47845400  | -1.57882500 |
| C | -3.45438500 | -0.03785200 | -1.51873900 |
| C | -2.08933200 | -0.23472700 | -1.74140900 |
| C | -1.49506700 | -1.39397100 | -1.25517500 |
| C | -2.23642400 | -2.35527300 | -0.55455100 |
| C | -3.59596900 | -2.12533100 | -0.33837400 |
| C | -4.21062700 | -0.96501500 | -0.81360000 |
| H | -1.50515900 | 0.52577900  | -2.26217100 |
| H | -0.43143000 | -1.55417200 | -1.41998300 |
| H | -4.18263400 | -2.85839900 | 0.21150200  |
| H | -5.26513400 | -0.76952700 | -0.64410600 |
| C | -1.56570800 | -3.60752500 | -0.04555300 |
| H | -2.26838600 | -4.23683300 | 0.50898600  |
| H | -1.16140700 | -4.20096300 | -0.87330300 |
| H | -0.73014400 | -3.36458200 | 0.62020100  |
| N | -3.35717300 | 2.70159700  | -1.59778200 |
| H | -2.32860100 | 2.70394600  | -2.03137500 |
| C | -3.32444700 | 2.89381900  | -0.14982600 |
| H | -2.81274600 | 2.05514500  | 0.35513000  |
| H | -4.35121500 | 2.93760300  | 0.23289000  |
| C | -2.58224400 | 4.19191900  | 0.15203100  |
| H | -3.12129600 | 5.02163200  | -0.32315200 |
| H | -1.59316700 | 4.14714100  | -0.32174400 |
| C | -2.44147300 | 4.44268300  | 1.65130600  |
| H | -1.89504300 | 3.60704200  | 2.11297300  |
| H | -3.43703600 | 4.45729600  | 2.12080000  |
| C | -1.71735100 | 5.74968900  | 1.97093400  |
| H | -0.72707600 | 5.73514400  | 1.49787300  |
| H | -2.26391400 | 6.58514100  | 1.51357900  |
| C | -1.57008500 | 5.99128000  | 3.47239500  |
| H | -1.00215200 | 5.18033100  | 3.94322000  |
| H | -1.04997200 | 6.93188400  | 3.68378400  |
| H | -2.55168200 | 6.03293100  | 3.95929200  |
| C | -0.46647900 | 4.60329800  | -3.78218500 |
| C | -0.92473000 | 3.13495300  | -3.75781700 |
| H | -1.90559800 | 3.13304700  | -4.28233500 |
| C | -0.00736800 | 2.27372700  | -4.63940100 |
| O | -0.95524500 | 2.66050300  | -2.49803200 |
| F | -1.30656800 | 5.35336900  | -3.04698200 |
| F | -0.45639200 | 5.14603800  | -5.02320800 |
| F | 0.76474300  | 4.78574700  | -3.27531400 |
| F | 0.00908200  | 2.66006600  | -5.93673600 |
| F | 1.27265800  | 2.26944800  | -4.22648100 |
| F | -0.42483700 | 0.99644800  | -4.62721600 |

## Int2

E = -1860.79147925 a.u.

-1 1

|   |             |             |             |
|---|-------------|-------------|-------------|
| S | -3.88817700 | 1.51587000  | -2.20771500 |
| O | -3.58324400 | 1.46325600  | -3.64806100 |
| O | -5.30554000 | 1.55918200  | -1.80277400 |
| C | -3.28132000 | -0.04904900 | -1.53823400 |
| C | -1.95904800 | -0.41726400 | -1.79702200 |
| C | -1.46402100 | -1.60222000 | -1.26675200 |
| C | -2.26768200 | -2.43061700 | -0.46979900 |
| C | -3.58196100 | -2.03895900 | -0.21673900 |

|   |             |             |             |
|---|-------------|-------------|-------------|
| C | -4.09267700 | -0.84989000 | -0.74595600 |
| H | -1.33151000 | 0.22733000  | -2.40843600 |
| H | -0.43503600 | -1.89279100 | -1.47101300 |
| H | -4.21780100 | -2.66912700 | 0.40234600  |
| H | -5.11537800 | -0.53623300 | -0.55889900 |
| C | -1.70952900 | -3.71382400 | 0.09558200  |
| H | -2.45820300 | -4.24097000 | 0.69486500  |
| H | -1.38172000 | -4.38827800 | -0.70365500 |
| H | -0.84108900 | -3.51972800 | 0.73532800  |
| N | -3.00244800 | 2.65808200  | -1.56470300 |
| H | -1.56627900 | 2.75298200  | -2.12606200 |
| C | -3.23169600 | 2.92614000  | -0.15381100 |
| H | -2.98093900 | 2.05212600  | 0.47943500  |
| H | -4.29039000 | 3.16032600  | 0.03626700  |
| C | -2.36381200 | 4.10605100  | 0.27407100  |
| H | -2.60713500 | 4.96460300  | -0.36565200 |
| H | -1.30981600 | 3.86509900  | 0.07972800  |
| C | -2.54972800 | 4.47405800  | 1.74411800  |
| H | -2.31544400 | 3.60267400  | 2.37395100  |
| H | -3.60716000 | 4.71301400  | 1.93223400  |
| C | -1.68376800 | 5.65445900  | 2.18219500  |
| H | -0.62877800 | 5.41618800  | 1.99271300  |
| H | -1.91852000 | 6.52488200  | 1.55522600  |
| C | -1.87418900 | 6.01422300  | 3.65498500  |
| H | -1.61901400 | 5.16468200  | 4.29938600  |
| H | -1.24656500 | 6.86162700  | 3.95199500  |
| H | -2.91790500 | 6.28081200  | 3.85913500  |
| C | -0.68799200 | 4.67732700  | -4.14239500 |
| C | -0.94214600 | 3.18402900  | -3.92005200 |
| H | -1.99561100 | 2.98863100  | -4.17764300 |
| C | -0.09338700 | 2.32155200  | -4.85230100 |
| O | -0.64752900 | 2.84589200  | -2.61756600 |
| F | -1.43632700 | 5.39948500  | -3.29838700 |
| F | -1.00655600 | 5.07413300  | -5.39235400 |
| F | 0.59263700  | 5.02973300  | -3.93715500 |
| F | -0.32765400 | 2.58742400  | -6.15312300 |
| F | 1.22652100  | 2.48430800  | -4.65415000 |
| F | -0.36220300 | 1.02425800  | -4.65910100 |

### Int3

E = -1071.16695153 a.u

-1 1

|   |             |             |             |
|---|-------------|-------------|-------------|
| S | -2.76089500 | 0.86329100  | -2.34899500 |
| O | -1.94697500 | 0.53012900  | -3.53106000 |
| O | -4.20958100 | 1.09035900  | -2.58015100 |
| C | -2.74718100 | -0.66407900 | -1.36078000 |
| C | -1.56332500 | -1.39873500 | -1.26053300 |
| C | -1.50806800 | -2.52132300 | -0.44275500 |
| C | -2.62558300 | -2.93015300 | 0.29977600  |
| C | -3.79859800 | -2.18345600 | 0.19409500  |
| C | -3.86374100 | -1.05616300 | -0.63135600 |
| H | -0.70096900 | -1.07651100 | -1.83815900 |
| H | -0.58536600 | -3.09677700 | -0.37528500 |
| H | -4.67743200 | -2.48769100 | 0.76069800  |
| H | -4.78044900 | -0.48197400 | -0.73325800 |
| C | -2.54933200 | -4.15202600 | 1.18332300  |
| H | -3.50563400 | -4.33833700 | 1.68238600  |

|   |             |             |             |
|---|-------------|-------------|-------------|
| H | -2.29296500 | -5.04705900 | 0.60427600  |
| H | -1.78332500 | -4.03565900 | 1.95915200  |
| N | -2.04490700 | 1.95574600  | -1.48821900 |
| C | -2.81739400 | 2.43296200  | -0.35810800 |
| H | -2.98371800 | 1.64252100  | 0.40565300  |
| H | -3.82028000 | 2.78798300  | -0.65342500 |
| C | -2.06412700 | 3.58042200  | 0.31016600  |
| H | -1.90877200 | 4.37084700  | -0.43658100 |
| H | -1.06605600 | 3.22204900  | 0.59681500  |
| C | -2.78646400 | 4.14670100  | 1.53053300  |
| H | -2.94145800 | 3.34644900  | 2.26999400  |
| H | -3.78986900 | 4.48991200  | 1.23673300  |
| C | -2.03835100 | 5.30180700  | 2.19514600  |
| H | -1.03578900 | 4.96047900  | 2.48695800  |
| H | -1.88715200 | 6.10293700  | 1.45896200  |
| C | -2.76719200 | 5.85858700  | 3.41767300  |
| H | -2.90391500 | 5.07942300  | 4.17689900  |
| H | -2.21793600 | 6.68639200  | 3.88041100  |
| H | -3.76230900 | 6.22733000  | 3.14219100  |

### Int4

E = -1071.05905903 a.u

0 2

|   |             |             |             |
|---|-------------|-------------|-------------|
| S | -3.24320800 | 0.14206800  | -1.10180200 |
| O | -2.02245900 | 0.46071100  | -1.83584100 |
| O | -4.54214500 | 0.60358300  | -1.57814700 |
| C | -3.31458800 | -1.60617300 | -0.84332100 |
| C | -2.13127400 | -2.33627700 | -0.82908800 |
| C | -2.19562500 | -3.70869800 | -0.60380800 |
| C | -3.42175500 | -4.34854800 | -0.39730900 |
| C | -4.59490300 | -3.58356000 | -0.42117900 |
| C | -4.55252500 | -2.21213900 | -0.64383000 |
| H | -1.18334600 | -1.83622700 | -1.00241300 |
| H | -1.27907500 | -4.29227700 | -0.59261800 |
| H | -5.55400600 | -4.07170000 | -0.26710500 |
| H | -5.45875600 | -1.61532000 | -0.67534400 |
| C | -3.49243900 | -5.83735600 | -0.17542100 |
| H | -3.91020600 | -6.33929300 | -1.05506900 |
| H | -2.50203900 | -6.25909700 | 0.01344000  |
| H | -4.13553700 | -6.07764000 | 0.67671100  |
| N | -3.03288800 | 0.72031800  | 0.47357200  |
| C | -3.00062100 | 2.17123400  | 0.50893100  |
| H | -4.04645300 | 2.51341500  | 0.44396600  |
| H | -2.48676100 | 2.57813700  | -0.37460600 |
| C | -2.35285100 | 2.64622300  | 1.80673100  |
| H | -2.97535500 | 2.32743000  | 2.65044900  |
| H | -2.35574900 | 3.74288900  | 1.80434900  |
| C | -0.92905100 | 2.10999200  | 1.99308600  |
| H | -0.98371700 | 1.02782800  | 2.16248900  |
| H | -0.50873500 | 2.55148600  | 2.90622600  |
| C | 0.01426400  | 2.38633100  | 0.81726300  |
| H | 1.00230900  | 1.98151300  | 1.06716300  |
| H | -0.32156300 | 1.83420700  | -0.07044000 |
| C | 0.14968100  | 3.87142200  | 0.48108500  |
| H | 0.44225800  | 4.44859300  | 1.36658500  |
| H | 0.90689700  | 4.03344800  | -0.29177900 |
| H | -0.79083800 | 4.29263300  | 0.10848100  |

**Int5**

E = -1071.05746534 a.u

0 2

|   |             |             |             |
|---|-------------|-------------|-------------|
| S | -3.16048100 | 0.12340800  | -1.42249400 |
| O | -2.16761600 | 0.28510500  | -2.48103800 |
| O | -4.51379200 | 0.62837700  | -1.60915100 |
| C | -3.21947200 | -1.60046000 | -0.99975900 |
| C | -2.27590000 | -2.46645400 | -1.53678700 |
| C | -2.33877500 | -3.81963000 | -1.20225500 |
| C | -3.32999000 | -4.30394500 | -0.34698000 |
| C | -4.27096400 | -3.40339400 | 0.17513300  |
| C | -4.22477400 | -2.05409700 | -0.14583800 |
| H | -1.51789500 | -2.08377200 | -2.21318400 |
| H | -1.60809000 | -4.50744600 | -1.61930100 |
| H | -5.05070500 | -3.77151300 | 0.83753400  |
| H | -4.95469700 | -1.35402400 | 0.24950600  |
| C | -3.40684200 | -5.76634500 | 0.00880200  |
| H | -4.34372000 | -6.20501200 | -0.35069100 |
| H | -2.57934200 | -6.32738700 | -0.43262500 |
| H | -3.37377500 | -5.90728100 | 1.09407300  |
| N | -2.61853400 | 0.78411900  | 0.02433800  |
| C | -2.78517300 | 2.24708300  | 0.13164800  |
| H | -3.80714200 | 2.47960300  | -0.17520200 |
| H | -2.09571500 | 2.76652300  | -0.54741600 |
| C | -2.55612000 | 2.68607400  | 1.57570500  |
| H | -3.37006200 | 2.30332200  | 2.20096400  |
| H | -2.61389800 | 3.78089400  | 1.60695300  |
| C | -1.21382100 | 2.21077900  | 2.16114800  |
| H | -1.26465700 | 1.13130700  | 2.34673200  |
| H | -1.09852800 | 2.67679900  | 3.15543000  |
| C | -0.02622600 | 2.52727800  | 1.30592400  |
| H | 0.78883500  | 1.81023900  | 1.26790400  |
| H | -1.63498800 | 0.52615500  | 0.13377700  |
| C | 0.24939700  | 3.93094100  | 0.87847500  |
| H | 0.50607500  | 4.56903300  | 1.74077100  |
| H | 1.08298900  | 3.98298500  | 0.17336200  |
| H | -0.62305800 | 4.39509000  | 0.40154600  |

**Int6**

E = -1561.98696634 a.u

0 3

|   |             |             |             |
|---|-------------|-------------|-------------|
| S | -2.26465600 | 0.64095100  | -2.23880900 |
| O | -1.21943100 | 0.08916800  | -3.08411300 |
| O | -3.65171800 | 0.73359600  | -2.66558200 |
| C | -2.24485600 | -0.29128000 | -0.71343400 |
| C | -1.07541600 | -0.96492800 | -0.34330800 |
| C | -1.03265800 | -1.63990500 | 0.87033400  |
| C | -2.13535300 | -1.64018800 | 1.73256800  |
| C | -3.29604700 | -0.95208800 | 1.33825600  |
| C | -3.36174700 | -0.28752100 | 0.10851600  |
| H | -0.22092900 | -0.95730300 | -1.01352600 |
| H | -0.12731100 | -2.16706100 | 1.15991300  |
| H | -4.16909100 | -0.96461700 | 1.98629500  |
| H | -4.26892900 | 0.21891400  | -0.20788000 |
| C | -2.07949800 | -2.37614500 | 3.04467600  |
| H | -2.94574600 | -2.14391400 | 3.66973200  |

|   |             |             |             |
|---|-------------|-------------|-------------|
| H | -2.06300600 | -3.45874700 | 2.87794300  |
| H | -1.17497500 | -2.11280600 | 3.60162900  |
| N | -1.78697900 | 2.17671300  | -1.84347700 |
| C | -2.67464600 | 2.97333400  | -0.99149900 |
| H | -2.80896600 | 2.51518900  | 0.00108200  |
| H | -3.65039200 | 3.01335000  | -1.48396600 |
| C | -2.09960400 | 4.37679300  | -0.83530100 |
| H | -2.10566700 | 4.87372000  | -1.81112200 |
| H | -1.05179800 | 4.30661600  | -0.51187600 |
| C | -2.88707600 | 5.19009000  | 0.20029000  |
| H | -3.96314200 | 5.12257700  | -0.01604200 |
| H | -2.62560400 | 6.25522700  | 0.08185000  |
| C | -2.62382800 | 4.75358000  | 1.60661400  |
| H | -1.58179800 | 4.67776800  | 1.91172200  |
| C | -3.67205400 | 4.87916800  | 2.66064700  |
| H | -4.61344900 | 4.41511300  | 2.33928100  |
| H | -3.36513000 | 4.40810000  | 3.59935600  |
| H | -3.90349300 | 5.93355100  | 2.88632900  |
| H | -0.82011400 | 2.16659800  | -1.51477500 |
| S | -2.15020000 | 1.32413900  | 2.95519200  |
| C | -1.04968400 | 1.62049500  | 1.76039900  |
| N | -0.27892300 | 1.82479000  | 0.90100300  |

**<sup>3</sup>Int7**

E = -1561.94888648 a.u

0 3

|   |             |             |             |
|---|-------------|-------------|-------------|
| S | -2.13796700 | 0.61148800  | -2.75491900 |
| O | -1.03072400 | 0.42307300  | -3.67940000 |
| O | -3.39149100 | 1.23482200  | -3.14940000 |
| C | -2.54073900 | -1.00722800 | -2.11073400 |
| C | -1.40769200 | -1.74130900 | -1.50821700 |
| C | -1.45675800 | -1.95198600 | -0.16556100 |
| C | -2.65415200 | -1.69450400 | 0.58558200  |
| C | -3.87424800 | -1.40091400 | -0.13915400 |
| C | -3.86201600 | -1.15026900 | -1.46894700 |
| H | -0.56275400 | -2.03793900 | -2.12147800 |
| H | -0.61181800 | -2.40469600 | 0.34994100  |
| H | -4.81673400 | -1.44128800 | 0.40405800  |
| H | -4.76633300 | -0.98668400 | -2.04542200 |
| C | -2.69820200 | -1.88297800 | 2.06799300  |
| H | -3.56883100 | -2.47968800 | 2.36623600  |
| H | -1.79573500 | -2.37604200 | 2.43920700  |
| H | -2.78622900 | -0.91871900 | 2.58863200  |
| N | -1.50826600 | 1.53297400  | -1.51801600 |
| C | -2.33834500 | 1.86078600  | -0.36054600 |
| H | -2.34417700 | 1.04063800  | 0.37430500  |
| H | -3.36206700 | 1.99187800  | -0.72615700 |
| C | -1.84311200 | 3.14822200  | 0.29123200  |
| H | -1.86754100 | 3.95285200  | -0.45272500 |
| H | -0.79354700 | 3.02298600  | 0.58789900  |
| C | -2.70181100 | 3.51692400  | 1.50086600  |
| H | -2.66184400 | 2.72032900  | 2.25803900  |
| H | -3.75162800 | 3.59138100  | 1.18644600  |
| C | -2.34977300 | 4.85088300  | 2.16200800  |
| H | -2.30316600 | 5.63837900  | 1.40280700  |
| C | -3.33268000 | 5.22283600  | 3.26243100  |
| H | -3.37301300 | 4.43829800  | 4.02498300  |

H -3.06079600 6.16463100 3.74636400  
H -4.33224900 5.33971900 2.82944000  
H -0.55521300 1.24358100 -1.30680400  
S -0.62749700 4.67121800 2.83017200  
C -0.43899700 6.22187300 3.49534500  
N -0.30376300 7.27858900 3.95569800

### Int8

E = -1070.8080104 a.u

1 1

S 0.84942200 -1.54363200 -0.55374600  
O -0.12516400 -2.61856100 -0.50234400  
O 2.02902500 -1.56454700 -1.39516300  
C -0.06179800 -0.05196500 -0.91956800  
C -1.44826300 -0.11536800 -1.06837400  
C -2.14325600 1.04632900 -1.39461300  
C -1.47149000 2.26199300 -1.60816600  
C -0.07431100 2.28795700 -1.48099000  
C 0.63704000 1.13793000 -1.14946400  
H -1.96067300 -1.06494000 -0.94112000  
H -3.22258600 1.00639400 -1.51564500  
H 0.46278100 3.21304300 -1.67373300  
H 1.72297600 1.15060000 -1.09164400  
C -2.22983900 3.49144000 -2.02851100  
H -3.23283400 3.51182300 -1.59503500  
H -1.70484200 4.40587800 -1.74227600  
H -2.34221900 3.50179700 -3.11855700  
N 1.44222300 -1.27174700 1.01147800  
C 0.81525000 -1.97300600 2.14333200  
H 1.57139000 -2.56935500 2.66022000  
H 0.06020100 -2.66829400 1.76358400  
C 0.18088800 -0.97962500 3.12149400  
H 0.95140400 -0.38365800 3.62177300  
H -0.34894000 -1.53533200 3.90048900  
C -0.81397900 -0.07929800 2.39073700  
H -1.45085500 0.47206100 3.13180800  
H -1.54303700 -0.63512000 1.78893200  
C -0.33435800 1.08985000 1.67619000  
H -1.01875000 1.52892500 0.94676300  
C 0.87626000 1.82739300 2.03144300  
H 0.97155600 2.77392100 1.50259200  
H 0.89940700 1.98160600 3.12162500  
H 1.73716600 1.17649000 1.81899600  
H 2.45335000 -1.39297200 0.96031900

### TS1

E = -1860.78908299 a.u

-1 1

S -4.10719100 1.45861000 -2.17587400  
O -3.90706300 1.43027900 -3.62569700  
O -5.47450200 1.49577300 -1.64009200  
C -3.38583200 -0.05741600 -1.52646600  
C -2.03123700 -0.30710800 -1.75963100  
C -1.46786100 -1.47495500 -1.25845700  
C -2.23140100 -2.39631200 -0.52814900  
C -3.57946900 -2.11648400 -0.30150000  
C -4.16167200 -0.94614900 -0.79422200

H -1.43155300 0.41932000 -2.30733400  
H -0.41267700 -1.67511100 -1.43411100  
H -4.18336500 -2.81845900 0.27002300  
H -5.20770700 -0.71340800 -0.61914800  
C -1.59567000 -3.65901700 -0.00018400  
H -2.31400300 -4.25642200 0.56943200  
H -1.21417600 -4.27972000 -0.81878200  
H -0.74947300 -3.42987700 0.65713900  
N -3.22009600 2.67103100 -1.59749400  
H -2.11301900 2.67491400 -2.04106500  
C -3.25123200 2.88481800 -0.15485100  
H -2.76257400 2.05422500 0.38721100  
H -4.29194900 2.93638400 0.19050100  
C -2.52423400 4.18796200 0.16381000  
H -3.03993600 5.00878200 -0.35109600  
H -1.51259700 4.14070700 -0.25958700  
C -2.45633100 4.46454400 1.66365000  
H -1.93161100 3.63834000 2.16593400  
H -3.47371500 4.48366700 2.08335000  
C -1.75221300 5.77913400 1.99678300  
H -0.73970700 5.76084400 1.57314400  
H -2.27806800 6.60487900 1.49931900  
C -1.67911000 6.04640900 3.49937000  
H -1.13198400 5.24593100 4.01104500  
H -1.17353500 6.99280500 3.72020000  
H -2.68352800 6.09152700 3.93685600  
C -0.51016000 4.61093800 -3.83819400  
C -0.95208600 3.14092700 -3.77824900  
H -1.96796700 3.11864900 -4.22313600  
C -0.08586800 2.27514100 -4.70081700  
O -0.89356400 2.67371400 -2.50823700  
F -1.29525200 5.35457900 -3.04088600  
F -0.60239500 5.14650200 -5.07762100  
F 0.75597500 4.80277600 -3.43066200  
F -0.13811800 2.66164100 -5.99586500  
F 1.21355100 2.27334300 -4.35416300  
F -0.50199600 0.99963200 -4.66214700

### TS2

E = -1071.02789331 a.u

0 2

S -3.37105400 0.55077100 -1.14166200  
O -2.27985000 0.99262400 -2.01015900  
O -4.75095100 0.84412200 -1.51372200  
C -3.18910700 -1.19227200 -0.86858500  
C -1.96347100 -1.79634700 -1.12127800  
C -1.82654300 -3.16311300 -0.88301900  
C -2.89780000 -3.92027200 -0.40226700  
C -4.12205200 -3.28106400 -0.16151200  
C -4.27753400 -1.92005000 -0.39177700  
H -1.14112900 -1.20442900 -1.51242700  
H -0.87445600 -3.64824500 -1.08122300  
H -4.96365200 -3.86242100 0.20727400  
H -5.22512300 -1.42000200 -0.21590200  
C -2.75802100 -5.40162500 -0.16235100  
H -3.36058800 -5.96880700 -0.88008700  
H -1.71911400 -5.72526900 -0.26486200



|   |             |             |             |
|---|-------------|-------------|-------------|
| H | -3.10271200 | -5.67112300 | 0.84096700  |
| N | -3.15462500 | 1.12841500  | 0.42261300  |
| C | -3.20920800 | 2.59766800  | 0.48021500  |
| H | -4.26477300 | 2.88934600  | 0.48200300  |
| H | -2.74728500 | 3.04585700  | -0.40951500 |
| C | -2.51167200 | 3.10237400  | 1.76314300  |
| H | -3.25153400 | 3.23357700  | 2.55773000  |
| H | -2.10516600 | 4.09604800  | 1.54791900  |
| C | -1.39752100 | 2.16153700  | 2.28378700  |
| H | -1.82684200 | 1.47121800  | 3.01655900  |
| H | -0.63798700 | 2.75474500  | 2.81273700  |
| C | -0.75677100 | 1.34412200  | 1.18108600  |
| H | -0.28538300 | 0.41985000  | 1.52735400  |
| H | -1.87158000 | 0.93134500  | 0.66762500  |
| C | 0.02955100  | 2.07987400  | 0.12506900  |
| H | 0.95270100  | 2.48820700  | 0.56118800  |
| H | 0.30490400  | 1.42272500  | -0.70397500 |
| H | -0.53470900 | 2.91877000  | -0.29454000 |

### TS3

E = -1561.94527427 a.u.

0 3

|   |             |             |             |
|---|-------------|-------------|-------------|
| S | -2.67624600 | 0.73573600  | -2.19578700 |
| O | -1.88867500 | 0.05228700  | -3.20575200 |
| O | -4.07913100 | 1.07162300  | -2.38835000 |
| C | -2.54017600 | -0.18850200 | -0.67725200 |
| C | -1.46271200 | -1.05270400 | -0.50398900 |
| C | -1.28144400 | -1.66843400 | 0.73112400  |
| C | -2.14293300 | -1.40997600 | 1.80127400  |
| C | -3.23273000 | -0.55494500 | 1.59401300  |
| C | -3.44651500 | 0.04767200  | 0.35541100  |
| H | -0.77607100 | -1.22826500 | -1.32642400 |
| H | -0.44037900 | -2.34205600 | 0.87236200  |
| H | -3.93188400 | -0.37166300 | 2.40676200  |
| H | -4.31629800 | 0.67450000  | 0.17937200  |
| C | -1.88813800 | -2.01515800 | 3.15699000  |
| H | -2.81677800 | -2.13745400 | 3.72124000  |
| H | -1.40505400 | -2.99227200 | 3.07151600  |
| H | -1.22451200 | -1.36715700 | 3.74175900  |
| N | -1.90253200 | 2.18545900  | -1.88833200 |
| C | -2.56887500 | 3.04842500  | -0.91045200 |
| H | -2.83783500 | 2.47120100  | -0.01549900 |
| H | -3.49953700 | 3.40982800  | -1.35952900 |
| C | -1.67391600 | 4.21048100  | -0.50473100 |
| H | -1.49107500 | 4.84991400  | -1.37509400 |
| H | -0.69822800 | 3.82519400  | -0.18303000 |
| C | -2.28472300 | 5.06369800  | 0.62103100  |
| H | -3.19013000 | 5.55645600  | 0.23711200  |
| H | -1.57469400 | 5.86391800  | 0.85342900  |

|   |             |            |             |
|---|-------------|------------|-------------|
| C | -2.66745200 | 4.34531000 | 1.91666300  |
| H | -2.37123800 | 4.91451600 | 2.80514100  |
| C | -4.11024200 | 3.88049300 | 2.03188600  |
| H | -4.40870600 | 3.25271500 | 1.18667100  |
| H | -4.28984400 | 3.32413400 | 2.95750100  |
| H | -4.77157100 | 4.75692500 | 2.03740900  |
| H | -0.91973700 | 2.00762600 | -1.66675100 |
| S | -1.54155500 | 2.66233000 | 2.25297900  |
| C | -0.32810300 | 1.57975100 | 1.38795700  |
| N | 0.32006200  | 1.33406200 | 0.43909500  |

### TS4

E = -1070.80800768 a.u.

1 1

|   |             |            |             |
|---|-------------|------------|-------------|
| S | -3.53433000 | 1.84273300 | -1.31378100 |
| O | -4.49717300 | 0.75677600 | -1.28568600 |
| O | -2.33829000 | 1.83894600 | -2.13193800 |
| C | -4.45304200 | 3.32775800 | -1.68500800 |
| C | -5.84065900 | 3.26126500 | -1.81627900 |
| C | -6.54205000 | 4.42152200 | -2.13544100 |
| C | -5.87540200 | 5.63796400 | -2.35852400 |
| C | -4.47658200 | 5.66665800 | -2.24854900 |
| C | -3.75906200 | 4.51860900 | -1.92390900 |
| H | -6.34967200 | 2.31073100 | -1.68250900 |
| H | -7.62265700 | 4.37924800 | -2.24361000 |
| H | -3.94371000 | 6.59248600 | -2.44928600 |
| H | -2.67254900 | 4.53290200 | -1.87941800 |
| C | -6.64055400 | 6.86576400 | -2.77162200 |
| H | -7.64240500 | 6.88000600 | -2.33533400 |
| H | -6.11876600 | 7.78135500 | -2.48304400 |
| H | -6.75577300 | 6.88033000 | -3.86131000 |
| N | -2.97236200 | 2.11386700 | 0.26386700  |
| C | -3.62000500 | 1.41216300 | 1.38307400  |
| H | -2.88238800 | 0.79019700 | 1.89674800  |
| H | -4.38905200 | 0.74014300 | 0.98954500  |
| C | -4.23613100 | 2.40834400 | 2.37017300  |
| H | -3.45473400 | 2.98866800 | 2.87189500  |
| H | -4.77389200 | 1.85677200 | 3.14658200  |
| C | -5.21768100 | 3.32825100 | 1.64452300  |
| H | -5.83745400 | 3.89250300 | 2.39054600  |
| H | -5.95910100 | 2.78584100 | 1.04621900  |
| C | -4.71887900 | 4.48713600 | 0.92781100  |
| H | -5.38715200 | 4.92360300 | 0.18197600  |
| C | -3.50439900 | 5.21521000 | 1.28755300  |
| H | -3.41704600 | 6.17666000 | 0.78445200  |
| H | -3.44623300 | 5.32890900 | 2.38017100  |
| H | -2.65259300 | 4.56910800 | 1.02439100  |
| H | -1.96024900 | 1.99325300 | 0.23218100  |

## 11. References

- [1] Q. Wang, P. Tian, Z.-Y. Cao, H. Zhang and C. Jiang, Copper-Catalyzed Remote Direct Thiocyanation of Alkyl C(sp<sup>3</sup>)-H Bonds, *Adv. Synth. Catal.*, 2020, **362**, 3851-3856.
- [2] Q.-Q. Min, J.-W. Yang, M.-J. Pang, G.-Z. Ao and F. Liu, Copper-catalyzed, N-directed remote C(sp<sup>3</sup>)-H azidation and thiocyanation, *Org. Chem. Front.*, 2021, **8**, 249-253.
- [3] E. A. Wappes, S. C. Fosu, T. C. Chopko and D. A. Nagib, Triiodide-Mediated  $\delta$ -Amination of Secondary C-H Bonds, *Angew. Chem. Int. Ed.*, 2016, **55**, 9974-9978.
- [4] N. Tang, X. Wu and C. Zhu, Practical, metal-free remote heteroarylation of amides via unactivated C(sp<sup>3</sup>)-H bond functionalization, *Chem. Sci.*, 2019, **10**, 6915-6919.
- [5] Y. Zhu, J. Shi and W. Yu, Photoinduced Site-Selective C(sp<sup>3</sup>)-H Chlorination of Aliphatic Amides, *Org. Lett.*, 2020, **22**, 8899-8903.
- [6] Y. Zhu, J.-J. Wang, D. Wu and W. Yu, Visible-Light-Driven Remote C-H Chlorination of Aliphatic Sulfonamides with Sodium Hypochlorite, *Asian J. Org. Chem.*, 2020, **9**, 1650-1654.
- [7] A. Modak, E. N. Pinter and S. P. Cook, Copper-Catalyzed, N-Directed Csp<sup>3</sup>-H Trifluoromethylthiolation (-SCF<sub>3</sub>) and Trifluoromethylselenation (-SeCF<sub>3</sub>), *J. Am. Chem. Soc.*, 2019, **141**, 18405-18410.
- [8] Z. Tonga, O. L. Garrya, P. J. Smitha, Y. Jianga, S. J. Mansfielda and E. A. Anderson, Au(I)-Catalyzed Oxidative Functionalization of Yndiamides, *Org. Lett.*, 2021, **23**, 4888-4892.
- [9] X.-B. Yan, L. Li, W.-Q. Wu, L. Xu, K. Li, Y.-C. Liu and H. Shi, Ni-catalyzed hydroalkylation of olefins with N-sulfonyl amines, *Nat. Commun.*, 2021, **12**, 5881.
- [10] X. Chen, Q. Wang, Z. Zhang, Z.-J. Niu, W.-Y. Shi, X.-P. Gong, R.-Q. Jiao, M.-H. Gao, X.-Y. Liu and Y.-M. Liang, Copper-Catalyzed Hydrogen Atom Transfer and Aryl Migration Strategy for the Arylalkylation of Activated Alkenes, *Org. Lett.*, 2022, **24**, 4338-4343.
- [11] L.-J. Zhong, Z.-Q. Xiong, X.-H. Ouyang, Y. Li, R.-J. Song, Q. Sun, X. Lu and J.-H. Li, Intermolecular 1,2-Difunctionalization of Alkenes Enabled by Fluoroamide-Directed Remote Benzyl C(sp<sup>3</sup>)-H Functionalization, *J. Am. Chem. Soc.*, 2022, **144**, 339-348.
- [12] W.-F. Zheng, P. P. Bora, G.-J. Sun and Q. Kang, Rhodium-Catalyzed Regio- and Stereoselective [2 + 2] Cycloaddition of Allenamides, *Org. Lett.*, 2016, **18**, 3694-3697.
- [13] H. Zhang, Y. Zhou, P. Tian and C. Jiang, Copper-Catalyzed Amide Radical-Directed Cyanation of Unactivated Csp<sup>3</sup>-H Bonds, *Org. Lett.*, 2019, **21**, 1921-1925.
- [14] A. N. Herron, C.-P. Hsu and J.-Q. Yu,  $\delta$ -C-H Halogenation Reactions Enabled by a Nitrogen-Centered Radical Precursor, *Org. Lett.*, 2022, **24**, 3652-3656.
- [15] N. R. Paz, D. Rodríguez-Sosa, H. Valdes, R. Marticorena, D. Melian, M. B. Copano, C. C. Gonzalez and A. J. Herrera, Chemoselective Intramolecular Functionalization of Methyl Groups in Nonconstrained Molecules Promoted by N-Iodosulfonamides, *Org. Lett.*, 2015, **17**, 2370-2373.
- [16] M. Zhu, K. Fujita and R. Yamaguchi, Simple and Versatile Catalytic System for N-Alkylation of Sulfonamides with Various Alcohols, *Org. Lett.*, 2010, **12**, 1336-1339.

- [17] C. Zhao, Y. Li, Y. Dong, M. Li, D. Xia, S. Gao, Q. Zhang, Q. Liu, W. Guan and J. Fu, Divergent regioselective Heck-type reaction of unactivated alkenes and N-fluoro-sulfonamides, *Nat. Commun.*, 2022, **13**, 6297.
- [18] Y. Qin, Y. Han, Y. Tang, J. Wei and M. Yang, A general method for site-selective Csp<sup>3</sup>-S bond formation via cooperative catalysis, *Chem. Sci.*, 2020, **11**, 1276-1282.
- [19] K.-J. Xiao, L. Chu, G. Chen and J.-Q. Yu, Kinetic Resolution of Benzylamines via Palladium (II)-Catalyzed C-H Cross-Coupling, *J. Am. Chem. Soc.*, 2016, **138**, 7796-7800.
- [20] S. Shi, X. Yang, M. Tang, J. Hu and T.-P. Loh, Direct Synthesis of  $\alpha$ -Amino Nitriles from Sulfonamides via Base-Mediated C-H Cyanation, *Org. Lett.*, 2021, **23**, 4018-4022.
- [21] Gaussian 16, Revision A.03, M. J. Frisch, G. W. Trucks, H. B. Schlegel, G. E. Scuseria, M. A. Robb, J. R. Cheeseman, G. Scalmani, V. Barone, G. A. Petersson, H. Nakatsuji, X. Li, M. Caricato, A. V. Marenich, J. Bloino, B. G. Janesko, R. Gomperts, B. Mennucci, H. P. Hratchian, J. V. Ortiz, A. F. Izmaylov, J. L. Sonnenberg, D. Williams-Young, F. Ding, F. Lipparini, F. Egidi, J. Goings, B. Peng, A. Petrone, T. Henderson, D. Ranasinghe, V. G. Zakrzewski, J. Gao, N. Rega, G. Zheng, W. Liang, M. Hada, M. Ehara, K. Toyota, R. Fukuda, J. Hasegawa, M. Ishida, T. Nakajima, Y. Honda, O. Kitao, H. Nakai, T. Vreven, K. Throssell, J. A. Montgomery, Jr., J. E. Peralta, F. Ogliaro, M. J. Bearpark, J. J. Heyd, E. N. Brothers, K. N. Kudin, V. N. Staroverov, T. A. Keith, R. Kobayashi, J. Normand, K. Raghavachari, A. P. Rendell, J. C. Burant, S. S. Iyengar, J. Tomasi, M. Cossi, J. M. Millam, M. Klene, C. Adamo, R. Cammi, J. W. Ochterski, R. L. Martin, K. Morokuma, O. Farkas, J. B. Foresman, and D. J. Fox, Gaussian, Inc., Wallingford CT, 2016.
- [22] Y. Zhao and D. G. Truhlar, The M06 suite of density functionals for main group thermochemistry, thermochemical kinetics, noncovalent interactions, excited states, and transition elements: two new functionals and systematic testing of four M06-class functionals and 12 other functionals, *Theor Chem Account.*, 2008, **120**, 215.
- [23] A. V. Marenich, C. J. Cramer and D. G. Truhlar, Universal Solvation Model Based on Solute Electron Density and on a Continuum Model of the Solvent Defined by the Bulk Dielectric Constant and Atomic Surface Tensions, *J. Phys. Chem. B.*, 2009, **113**, 6378.
